# Supplementary material
Source: PubMed Central journal article supplement (PMC6517266)
Supplement: EMS82106-supplement-Supplementary_Information.pdf [file EMS82106-supplement-Supplementary_Information.pdf]

Supplementary Information

# Synthesis and breakdown of universal metabolic precursors promoted by iron

Kamila B. Muchowska, Sreejith J. Varma, Joseph Moran\*

Université de Strasbourg, CNRS, ISIS UMR 7006, F-67000 Strasbourg, France  
moran@unistra.fr

**Content:**

Materials and Methods  
Figures S1 to S29  
Tables S1 to S4

## Materials and Methods

**General information.** All reactions were carried out in 10 mL Pyrex glass culture tubes under inert atmosphere (30 s argon purge) unless otherwise noted.

GC-MS analysis was performed on a GC System 7820A (G4320) coupled to an MSD block 5977E (G7036A). An Agilent High Resolution Gas Chromatography Column (PN 19091S – 433UI, HP – 5MS UI, 28 m×0.250 mm, 0.25 Micron, SN USD 489634H) was used. Hydrogen (99.999 % purity) was the carrier gas, supplied at a constant flow rate of 1.5 mL min<sup>-1</sup>. Samples were prepared in ethyl acetate (200 μL sample volume). The analysis was carried out on a 1 μL injection volume (splitless mode). The injection port temperature was 250 °C, and the column oven temperature program was: 60 °C for 1 min, then increased to 310 °C with a 30 °C min<sup>-1</sup> ramp, followed by a 3-min hold (total running time 12.33 min). The mass spectrometer was turned on after a 2-min delay and was operated at the electron ionization mode with quadrupole temperature of 150 °C. Data was acquired in the full-scan mode (50-500). Data analysis and integration were performed using *Agilent MassHunter Workstation v.B.06.00* software.

<sup>1</sup>H NMR spectra were recorded on a Bruker Avance400 (400 MHz) spectrometer at ambient temperature in a H<sub>2</sub>O:D<sub>2</sub>O mixture (6:1) as solvent, with sodium 3-(trimethylsilyl)-1-propanesulfonate (DSS) as the internal standard (CH<sub>3</sub> peak at 0 ppm). Water suppression was achieved using the Bruker ZGESGP pulse program. Relaxation delay D1 was set to 87 s, with time domain size TD = 32768 and sweep width SWH = 4789.27 Hz (11.963 ppm). 32 scans were acquired for each sample. Integration was performed using *MestReNova v6.0.2* software.

**Materials.** Unless otherwise noted, all reagents and solvents were purchased from commercial suppliers and used without further purification. Hydroxyketoglutarate and oxopentenedioate were prepared using a literature procedure.<sup>1</sup> Water was obtained from a Milli-Q purification system (18 MΩcm) and was purged with argon before use. All glassware and stir bars were pre-washed with aqua regia, followed by distilled water and acetone, and oven dried to prevent any cross-contamination by metal salts.

**Product identification.** To facilitate GC-MS analysis, a literature derivatization procedure<sup>2,3</sup> was applied to the sample to convert carboxy groups to ethyl esters, hydroxy groups to ethyl carbonates, amino groups to ethyl carbamates, ketones to diethyl ketals, and aldehydes to acetals. A 700 μL aliquot of the reaction mixture was basified using ~50 mg solid KOH (Merck EMSURE) and centrifuged (6000 rpm, 3 min). To 600 μL of the supernatant was added EtOH (300 μL) and pyridine (40 μL), followed by ethyl chloroformate (ECF, 40 μL). After vortex mixing for 30 s, a second 40 μL portion of ECF was added and vortex mixing was continued for another 30 s. To this, CHCl<sub>3</sub> (200 μL) was added, followed by vortex mixing (10 s). Finally, saturated aqueous NaHCO<sub>3</sub> (600 μL) was added and the mixture was vortex mixed again for 10 s. The CHCl<sub>3</sub> layer was separated and dried over anhydrous Na<sub>2</sub>SO<sub>4</sub>. 50 μL of the dry CHCl<sub>3</sub> layer was added with 150 μL of ethyl acetate to a vial and subjected to GC-MS analysis. Reaction products derivatized to ethyl esters were identified by comparing the mass spectra and retention times to those of analogously derivatized authentic samples, as shown below and also described elsewhere.<sup>2</sup>

*N.b.:* Unlike citrate,<sup>2</sup> isocitrate at 40 mM (a much higher concentration than the one used in this study) undergoes derivatisation-induced dehydration to aconitate in less than 1% yield. At lower concentrations, more representative of this study, dehydration is negligible (right).

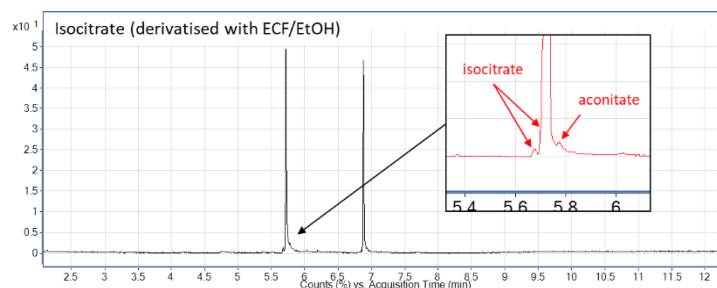

Formate and acetate were determined using an NMR procedure and a GC-MS procedure, both reported in the literature.<sup>3</sup>

- a) NMR procedure: to a 1.5 mL plastic microtube was added ~1 mL of the reaction mixture and ~50 mg solid KOH (Merck EMSURE). The resulting thick suspension was centrifuged at 10 000 rpm for 20 min. To 600  $\mu$ L of the supernatant was added 100  $\mu$ L of 0.05 M solution of internal standard (DSS in D<sub>2</sub>O). The solution was analyzed by NMR using the Bruker ZGESGP pulse program, as described above.
- b) GC-MS detection of formate and acetate as their amides with *N*-methylphenylethylamine: To a 120  $\mu$ L aliquot of a reaction mixture in a 1.5 mL plastic microtube were added: 50  $\mu$ L of 0.12 M solution of 1-hydroxybenzotriazole in H<sub>2</sub>O, 75  $\mu$ L of 0.08 M 1-ethyl-3-(3-dimethyl-aminopropyl)carbodiimide solution (EDC) in acetonitrile, and 75  $\mu$ L of 0.06 M *N*-methylphenylethylamine (MPEA) in acetonitrile. The resulting mixture was vortex mixed for 30 s and incubated at 60 °C for 45 min. After cooling to room temperature, 200  $\mu$ L of CHCl<sub>3</sub> was added to the mixture and vortex mixed for 30 s. The CHCl<sub>3</sub> layer was removed and dried over anhydrous MgSO<sub>4</sub>. 50  $\mu$ L of the CHCl<sub>3</sub> supernatant was added to a vial together with 150  $\mu$ L of EtOAc, and analysed by GC-MS.

**Product quantification and error analysis.** Carboxylic acids and amino acids were quantified according to a literature procedure,<sup>2</sup> using 6-point calibration curves prepared from ECF/EtOH-derivatized solutions of authentic samples (0.006 M, 0.013 M, 0.020 M, 0.027 M, 0.033 M and 0.040 M) as described above.

Each data point was obtained from three independent measurements and the correlation line was obtained from the least-squares fitting (intercept = 0). Error bars on graphs are shown as  $\pm$  standard deviation for each data point. For the linear fits, overall percentage error of the response factor corresponds to  $\pm$  standard deviation for each slope value. For the polynomial fits, 95% confidence envelopes are shown.

Calibration lines for pyruvate, malate, fumarate, succinate,  $\alpha$ -ketoglutarate, isocitrate, cis-aconitate, tricarballylate and alanine are identical to those we previously reported for the same analytical setup.<sup>2</sup>

Calibration lines for glyoxylate, glycolate, oxalate, malonate, levulinate, mesaconate, hydroxyketoglutarate/oxopentenedioate (HKG/OPD), glycine, aspartate and glutamate are shown below (Figures S2, S10).

Response factors corresponding to calibration lines for all the compounds detected by the GC-MS in this study are listed in the Table S1.

Yields were calculated by comparing the GC peak area against the calibration line. Each reaction was performed at least twice, and reported yields are an average of those two runs, with an error corresponding to  $\pm$  standard deviation.

Formate and acetate were quantified by NMR with DSS as standard, following a procedure we reported before.<sup>3</sup> Equations corresponding to these calibration lines are listed in Table S1.

Hydroxyketoglutarate and oxopentenedioate (HKG/OPD) were quantified together (due to rapid interconversion of the two compounds during derivatization) as obtained in an aqueous reaction mixture (see Synthetic Procedures below). The concentration of HKG/OPD in the reaction mixture was determined by NMR (ZGESGP pulse program, 200 mL reaction mixture + 500 mL 0.0360 M solution of sodium fumarate in D<sub>2</sub>O as internal standard) to be 0.0775 M. From this, 6 solutions were prepared by dilution, for subsequent ECF/EtOH derivatization and calibration on the GC-MS as described above for other carboxylic acids.

Mass spectra of all the compounds detected in this study through the derivatization with ECF/EtOH are shown in Figure S3.

## Synthetic procedures

*General procedure (qualitative metal screen):* to a 10 mL Pyrex pressure tube were added sodium pyruvate (1 equiv, 0.1 mmol, 11 mg), sodium glyoxylate (2.0 equiv, 0.20 mmol, 22 mg), transition metal salt (2.0 equiv, 0.20 mmol, 40 mg of MnCl<sub>2</sub>·4H<sub>2</sub>O or 40 mg of FeCl<sub>2</sub>·4H<sub>2</sub>O, or 48 mg of CoCl<sub>2</sub>·6H<sub>2</sub>O, or 48 mg of NiCl<sub>2</sub>·6H<sub>2</sub>O, or 34 mg of CuCl<sub>2</sub>·6H<sub>2</sub>O, or 27 mg of ZnCl<sub>2</sub>), and 3 mL of MilliQ water. The contents of the tube were flushed with argon. The tube was then sealed, and the reaction mixture stirred at 70 °C (1000 rpm, external heating block) for 3 h, followed by the KOH workup and ECF/EtOH derivatization, as described above.

*General procedure (Fe<sup>2+</sup>-promoted reactions):* to a 10 mL Pyrex pressure tube were added sodium pyruvate (1 equiv, 0.20 mmol, 22 mg), sodium glyoxylate (2.0 equiv, 0.40 mmol, 44 mg), FeCl<sub>2</sub>·4H<sub>2</sub>O (2.0 equiv, 0.40 mmol, 80 mg), and 6 mL of MilliQ water. The contents of the tube were flushed with argon. The tube was then sealed, and the reaction mixture stirred at 70 °C (1000 rpm, external heating block) for up to 48 h, followed by the KOH workup and ECF/EtOH derivatization, as described above.

*Reductive amination of glyoxylate/pyruvate network intermediates:* to a 10 mL Pyrex pressure tube were added sodium pyruvate (1.0 equiv, 0.10 mmol, 11 mg), sodium glyoxylate (2.0 equiv, 0.20 mmol, 22 mg), FeCl<sub>2</sub>·4H<sub>2</sub>O (2.0 equiv, 0.20 mmol, 40 mg), and 3 mL of MilliQ water. The contents of the tube were flushed with argon. The tube was then sealed, and the reaction mixture stirred at 70 °C for 1 h (1000 rpm, external heating block). Then, to the reaction mixture were added hydroxylamine hydrochloride (6.0 equiv, 0.60 mmol, 42 mg) and Fe<sup>0</sup> powder (10 equiv, 1.0 mmol, 56 mg). The tube was sealed and stirring was continued at 70 °C for 1 h, followed by the KOH workup and ECF/EtOH derivatization, as described above.

*Hydroxyketoglutarate:* prepared using a literature procedure (1) from oxaloacetic acid (1.00 equiv, 0.902 mmol, 119 mg) in 9.88 mL of 1.0 M potassium phosphate buffer (pH 7.15) and glyoxylic acid (1.20 equiv, 1.08 mmol, added as 119 μL 50% w/w aq. solution). The reaction mixture was stirred for 3 h at 25 °C, yielding a 0.0775 M solution of hydroxyketoglutarate (86%, NMR yield). <sup>1</sup>H NMR (400 MHz, H<sub>2</sub>O+D<sub>2</sub>O) δ 4.26 (dd, *J* = 8.6, 3.4 Hz, 1H), 3.09 (dd, *J* = 17.8, 3.4 Hz, 1H), 2.95 (dd, *J* = 17.8, 8.5 Hz, 1H).

**Time-point experiment (unlabeled compounds).** The experiment was performed in two replicas, in parallel. 700 mL aliquots of the reaction mixtures were drawn at the following time points: 5 min (substrates added and vortex mixed for 30 s), 1 h, 3 h, 7 h, 10 h, 24 h, 48 h. The results were normalized against a “0 h” mixture of sodium pyruvate (1.0 equiv, 0.20 mmol, 22 mg) and sodium glyoxylate (2.0 equiv, 0.40 mmol, 44 mg) in water (3 mL), without Fe<sup>2+</sup> added, and derivatized with ECF/EtOH using the procedure described above. Reported percentage values are scaled against the number of carbon atoms in each compound, to account for the total carbon mass balance of the system (Table S2). GC chromatograms of the time-point experiment are shown in Figure S4, and mass spectra of all compounds detected at t = 24 h (the highest complexity) are shown in Figure S5.

The reaction mixture pH change over time was measured with an AquaLytic AL10pH handheld pH meter and found to equal ~4.45 at t = “0 h” and ~5.65 at t = 24 h.

**Time-point experiment (with pyruvate-2-<sup>13</sup>C).** The experiment was performed in two replicas, in parallel, using sodium pyruvate-2-<sup>13</sup>C. 700 mL aliquots of the reaction mixtures were drawn at the following time points: 5 min (substrates added and vortex mixed for 30 s), 1 h, 3 h, 7 h, 10 h, 24 h, 48 h. The results were normalized against a “0 h” mixture of sodium pyruvate-2-<sup>13</sup>C (1.0 equiv, 0.20 mmol, 22 mg) and sodium glyoxylate (2.0 equiv, 0.40 mmol, 44 mg) in water (3 mL), without Fe<sup>2+</sup> added, derivatized with ECF/EtOH using the procedure described above. Reported percentage values are scaled against the number of carbon atoms in each compound, to account for the total carbon mass balance of the system (Table S4) and are shown in Figure S15.

The <sup>13</sup>C label present in pyruvate was found to be carried over to the following intermediates: levulinate, malonate, malate, fumarate, succinate, α-ketoglutarate, hydroxyketoglutarate/oxopentenedioate, isocitrate, aconitate, tricarballoylate, and acetate.

Oxalate, glycolate and formate remained label-free, meaning these compounds are derived from glyoxylate.

See Figure S16 for relevant GC chromatograms and mass spectra, and Figure S20 for a graphical depiction of the <sup>13</sup>C label propagation in the network. Additionally, see below for the detection of formate and acetate.

**Detection of formate and acetate.** Formate and acetate were detected in the reaction mixtures at the 48 h time-point, using NMR as well as GC-MS (derivatization with ECD/MPEA to amides<sup>3</sup>). See Product identification section for sample preparation details.

Results obtained for unlabeled starting materials are shown in Figure S7 (GC-MS) and Figure S8 (<sup>1</sup>H NMR), for <sup>13</sup>C-labeled pyruvates – in Figure S18, Figure S25 and Figure S27; for <sup>13</sup>C<sub>2</sub>-labeled glyoxylate – in Figure S29.

**Reductive amination of ketoacids with hydroxylamine.** Reductive amination was performed according to the procedure described above on 0.10 mmol of each ketoacid (sodium glyoxylate: 11 mg; sodium pyruvate: 11 mg; oxaloacetic acid: 13 mg; α-ketoglutarate: 15 mg), 0.1 mmol of hydroxylamine hydrochloride (1 equiv, 7 mg) and 1.0 mmol of Fe(0) powder (10 equiv, 56 mg). The reaction was carried out at 100 °C over 16 h to ensure completion. Obtained chromatograms and mass spectra of ECF/EtOH derivatized reaction mixtures are shown in Figure S9. See Table 3 for product yields.

**Detection of glycine, alanine, aspartic acid and glutamic acid in the Fe<sup>2+</sup>-promoted reaction mixture.** Reductive amination was performed according to the procedure described above. Following KOH workup and ECF/EtOH derivatization, four amino acids were detected as their

ethyl esters (glycine, alanine, aspartic acid and glutamic acid). A GC chromatogram of a typical reaction mixture as well as relevant mass spectra are shown in Figure S8. Mass spectra of authentic amino acids derivatized with ECF/EtOH are shown in Figure S11.

**Control experiments with Fe<sup>2+</sup> (without glyoxylate).** Control experiments were performed on individual intermediates detected in the reaction network: glyoxylate, glycolate, pyruvate, oxalate, oxaloacetate, malonate, malate, fumarate, succinate, mesaconate, hydroxyketoglutarate/oxopentenedioate (HKG/OPD),  $\alpha$ -ketoglutarate, isocitrate and aconitate (Figure S13).

The general procedure was used (except for HKG/OPD): 1.0 equiv (0.1 mmol) of a chosen intermediate, FeCl<sub>2</sub>·4H<sub>2</sub>O (2.0 equiv, 0.20 mmol, 40 mg) and 3 mL of MilliQ water. The contents of the tube were flushed with argon. The tube was then sealed, and the reaction mixture stirred at 70 °C (1000 rpm, external heating block) for 16 h, followed by the KOH workup and ECF/EtOH derivatization, as described above.

HKG/OPD was prepared using the procedure described above. From the reaction mixture 3 mL were taken and combined with FeCl<sub>3</sub>·6H<sub>2</sub>O (2.0 equiv, 0.20 mmol, 54 mg). The contents of the tube were flushed with argon. The tube was then sealed, and the reaction mixture stirred at 70 °C (1000 rpm, external heating block) for 16 h, followed by the KOH workup and ECF/EtOH derivatization, as described above.

**Control experiments with Fe<sup>2+</sup> and glyoxylate.** Control experiments with Fe<sup>2+</sup> and glyoxylate were performed on individual intermediates detected in the reaction network: glycolate, pyruvate, oxalate, oxaloacetate, malonate, malate, fumarate, succinate, mesaconate, hydroxyketoglutarate/oxopentenedioate (HKG-OPD),  $\alpha$ -ketoglutarate, isocitrate and aconitate (Figure S14).

The general procedure was used: 1 equiv (0.1 mmol) of a chosen intermediate, sodium glyoxylate (2.0 equiv, 0.20 mmol, 22 mg), FeCl<sub>2</sub>·4H<sub>2</sub>O (2.0 equiv, 0.20 mmol, 40 mg) and 3 mL of MilliQ water. The contents of the tube were flushed with argon. The tube was then sealed, and the reaction mixture stirred at 70 °C (1000 rpm, external heating block) for 16 h, followed by the KOH workup and ECF/EtOH derivatization, as described above.

**Control experiments suggesting oxidation of malate to oxaloacetate.** A control experiment was performed to trap oxaloacetate (undetectable via derivatization by ECF/EtOH) as aspartate, through *in situ* reductive amination with hydroxylamine and Fe(0).

Two experiments were performed: with Fe<sup>2+</sup> and Fe<sup>3+</sup>. Aspartic acid was detected in both cases, as shown in Figure S12 (see Figure S11 for an MS spectrum of an authentic sample of aspartate). General reductive amination procedure was used: malic acid (1.0 equiv, 0.10 mmol, 13 mg) and iron salt (2.0 equiv, 0.20 mmol, 40 mg of FeCl<sub>2</sub>·4H<sub>2</sub>O or 54 mg of FeCl<sub>3</sub>·6H<sub>2</sub>O), and 3 mL of MilliQ water. The contents of the tube were flushed with argon. The tube was then sealed, and the reaction mixture stirred at 70 °C for 1 h (1000 rpm, external heating block). Then, to the reaction mixture were added hydroxylamine hydrochloride (6.0 equiv, 0.60 mmol, 42 mg) and Fe<sup>0</sup> powder (10 equiv, 1.0 mmol, 56 mg). The tube was sealed and stirring was continued at 70 °C for 1 h, followed by the KOH workup and ECF/EtOH derivatization, as described above.

Another indirect proof of malate oxidation is the presence of acetate detected in the reaction mixture comprising of malic acid and iron salts heated at 70 °C over 16 h.

Oxaloacetate is unstable in solution in the presence of transition metal salts, and decarboxylates to pyruvate, which, in turn, decarboxylates to acetate, easily detected by NMR (Figure S19). General procedure was used: malic acid (1.0 equiv, 0.10 mmol, 13 mg) and iron salt (2.0 equiv, 0.20 mmol, 40 mg of FeCl<sub>2</sub>·4H<sub>2</sub>O or 54 mg of FeCl<sub>3</sub>·6H<sub>2</sub>O), and 3 mL of MilliQ water. The contents of the

tube were flushed with argon. The tube was then sealed, and the reaction mixture stirred at 70 °C for 16 h (1000 rpm, external heating block) followed by the KOH workup and NMR sample preparation, as described above.

**Control experiment: hydroxyketoglutarate/oxopentenedioate + Fe<sup>3+</sup>.** A control experiment was performed to evidence oxidative decarboxylations of HKG/OPD with Fe<sup>3+</sup> species as oxidant. The results, highlighting the presence of fumarate and succinate, are shown in Figure S18.

HKG/OPD was prepared using the procedure described above. From the reaction mixture 3 mL were taken and combined with FeCl<sub>3</sub>·6H<sub>2</sub>O (2.0 equiv, 0.20 mmol, 54 mg). The contents of the tube were flushed with argon. The tube was then sealed, and the reaction mixture stirred at 70 °C (1000 rpm, external heating block) for 16 h, followed by the KOH workup and ECF/EtOH derivatization, as described above.

### **Additional <sup>13</sup>C labelling experiments.**

- 1) *Experiment with sodium pyruvate-1-<sup>13</sup>C*: the reaction was performed in two replicas, in parallel, following the general procedure described above. A 700 mL aliquot of each reaction mixture was drawn after 24 h and derivatized with ECF/EtOH, according to the procedure described above. After 48 h, another 700 mL aliquot from each reaction mixture was drawn and derivatized with ECD/MPEA, following the procedure described above, to detect formate and acetate. The <sup>13</sup>C label present in pyruvate was found to be carried over to the following intermediates: lactate, α-ketoglutarate, hydroxyketoglutarate/oxopentenedioate, and mesaconate. See Figure S21 for the visualization of the <sup>13</sup>C label distribution in the network, and Figure S24 and S25 for relevant GC chromatograms and mass spectra.
- 2) *Experiment with sodium pyruvate-3-<sup>13</sup>C*: the reaction was performed in two replicas, in parallel, following the general procedure described above. A 700 mL aliquot of each reaction mixture was drawn after 24 h and derivatized with ECF/EtOH, according to the procedure described above. After 48 h, another 700 mL aliquot from each reaction mixture was drawn and derivatized with ECD/MPEA, following the procedure described above, to detect formate and acetate. The <sup>13</sup>C label present in pyruvate was found to be carried over to the following intermediates: acetate, levulinate, malonate, lactate, fumarate, succinate, malate, α-ketoglutarate, isocitrate, aconitate, tricarballoylate, hydroxyketoglutarate/oxopentenedioate, and mesaconate. See Figure S22 for the visualization of the <sup>13</sup>C label distribution in the network, and Figure S26 and S27 for relevant GC chromatograms and mass spectra.
- 3) *Experiment with sodium glyoxylate-1,2-<sup>13</sup>C<sub>2</sub>*: the reaction was performed in a single replica, following the general procedure described above. A 700 mL aliquot of the reaction mixture was drawn after 24 h and derivatized with ECF/EtOH, according to the procedure described above. After 48 h, another 700 mL aliquot from each reaction mixture was drawn and derivatized with ECD/MPEA, following the procedure described above, to detect formate and acetate. The <sup>13</sup>C label present in pyruvate was found to be carried over to the following intermediates: formate, oxalate, glycolate, malonate, levulinate, fumarate, succinate, malate, α-ketoglutarate, hydroxyketoglutarate/oxopentenedioate, isocitrate, aconitate, tricarballoylate and mesaconate. See Figure S23 for the visualization of the <sup>13</sup>C label distribution in the network, and Figure S28 and S29 for relevant GC chromatograms and mass spectra.

### Supplementary references

1. G. Springsteen, J. Yerabolu, J. Nelson, C. Rhea & R. Krishnamurthy, Linked cycles of oxidative decarboxylation of glyoxylate as protometabolic analogs of the citric acid cycle, *Nature Communications* **9**, 91 (2013).
2. K. B. Muchowska *et al.*, Metals promote sequences of the reverse Krebs cycle, *Nature Ecology & Evolution* **1**, 1716–1721 (2017).
3. S. J. Varma, K. B. Muchowska, P. Chatelain & J. Moran, Native iron reduces CO<sub>2</sub> to intermediates and end-products of the acetyl-CoA pathway, *Nature Ecology & Evolution* **2**, 1019–1024 (2018).



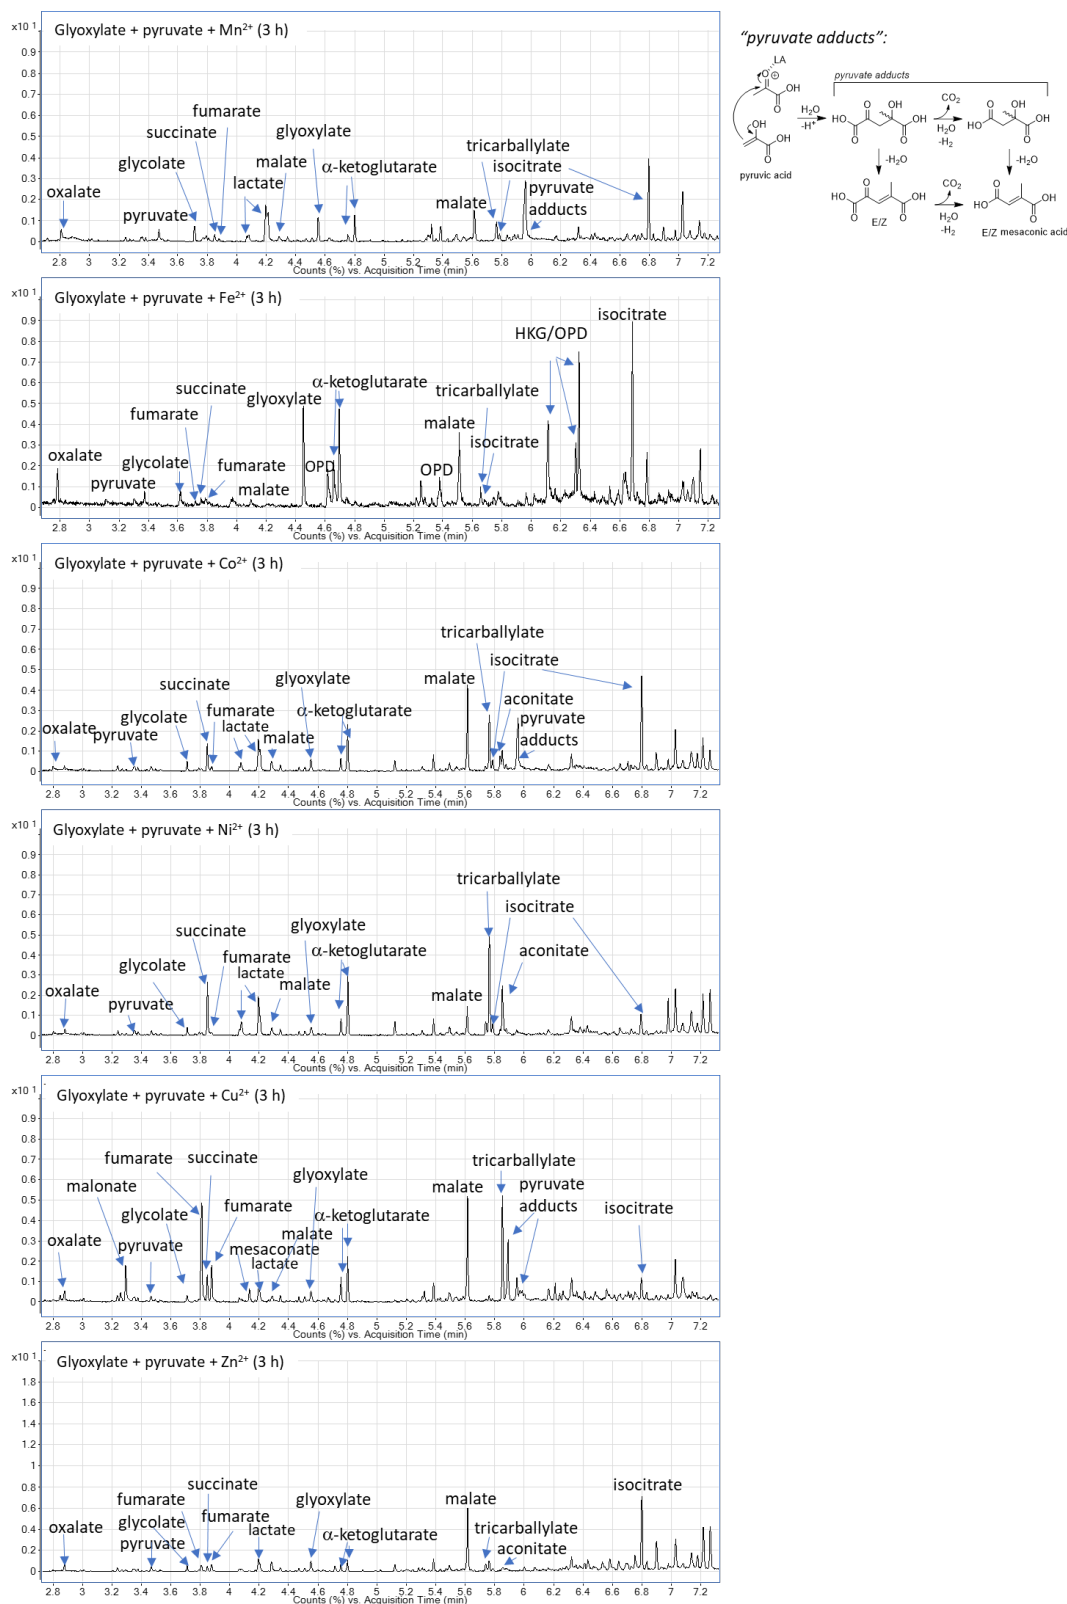

**Figure S1.**

GC chromatograms showing a reaction network arising from pyruvate and glyoxylate, promoted by transition metal ions at 70 °C (qualitative screen).

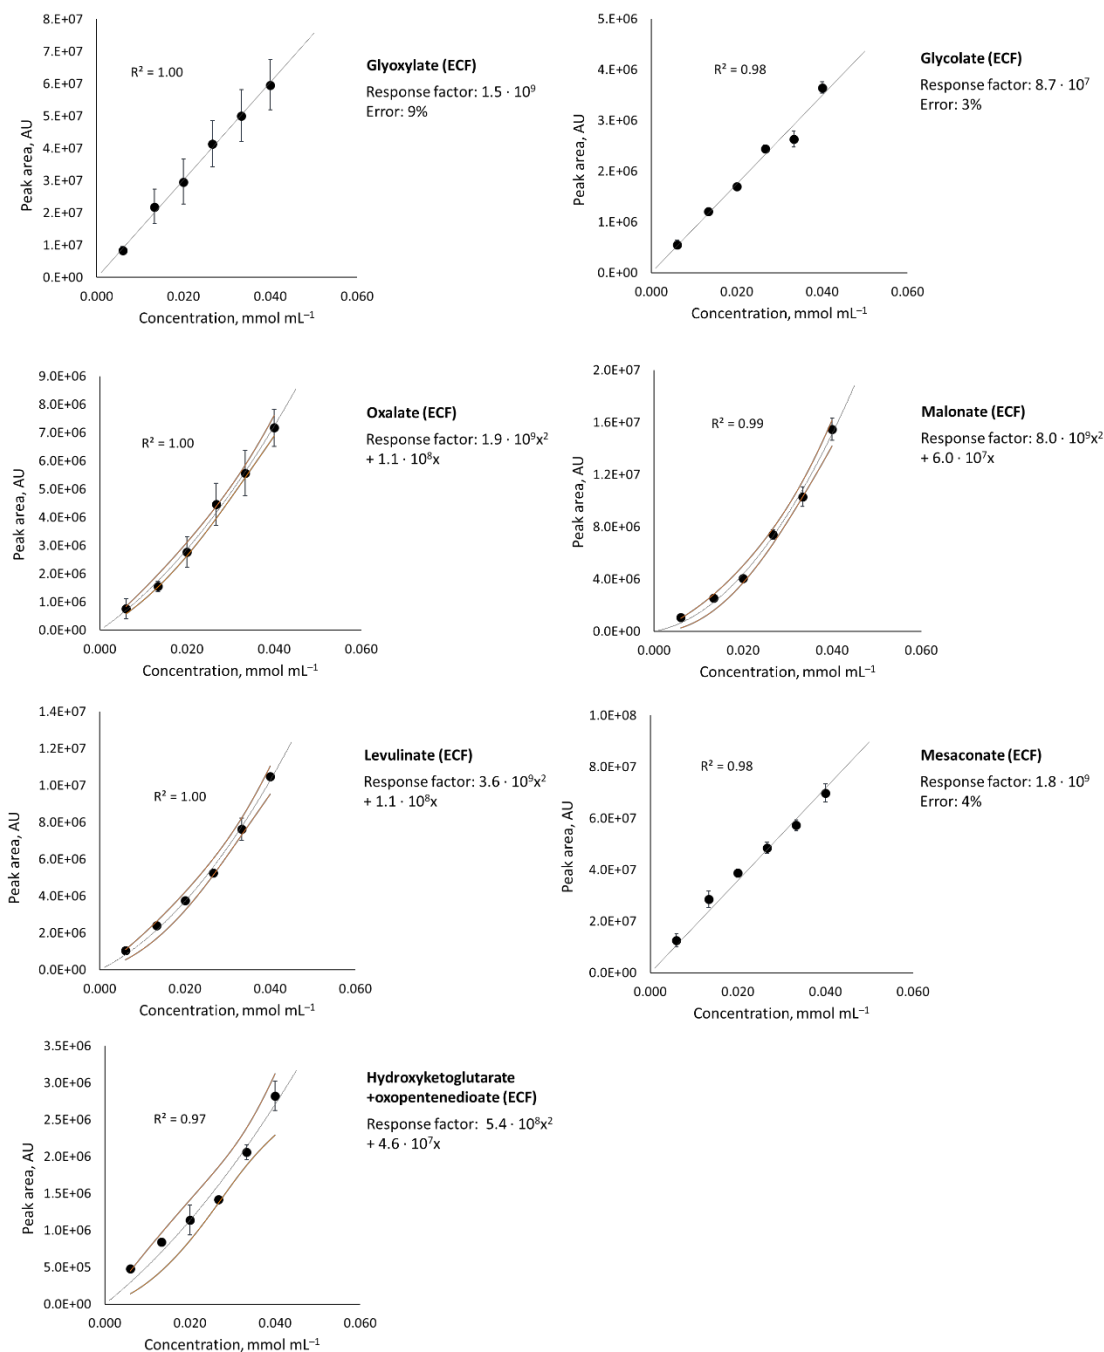

**Figure S2.**

Correlation between the concentration of an aqueous solution of carboxylic acids (glyoxylic, glycolic, oxalic, malonic, levulinic, mesaconic and hydroxyketoglutaric + oxopentenedioic) and the measured gas chromatography peak area. 95% confidence bounds computed for 2<sup>nd</sup> degree polynomial fits (*OriginPro*) are shown as orange lines.

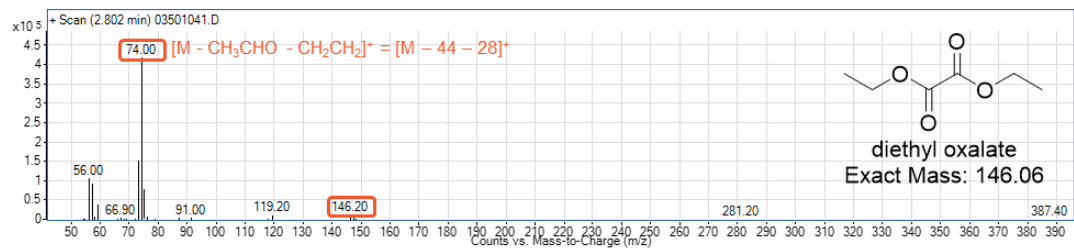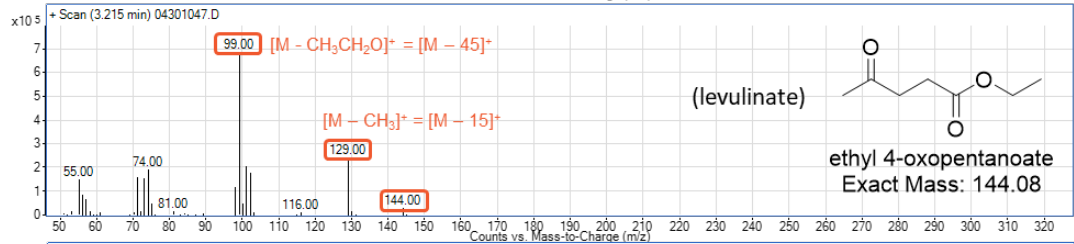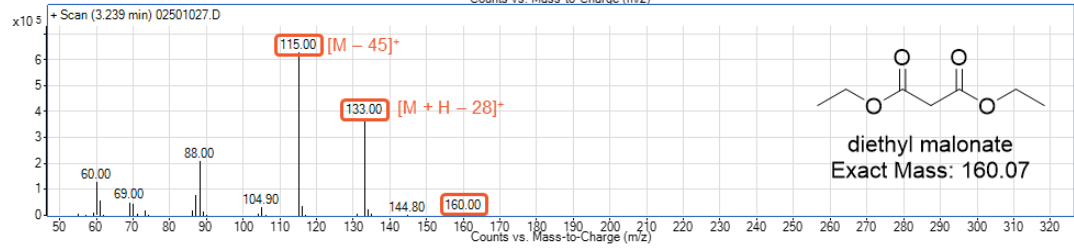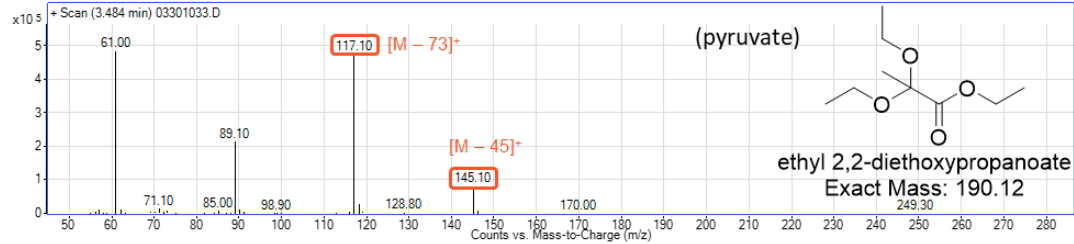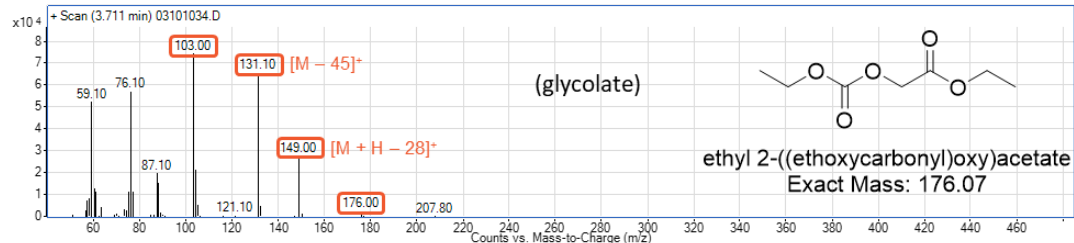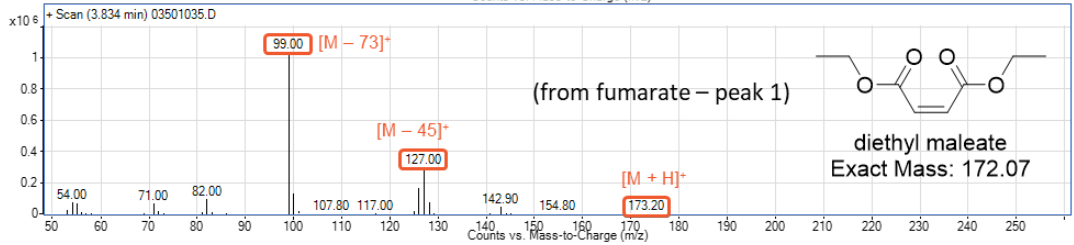

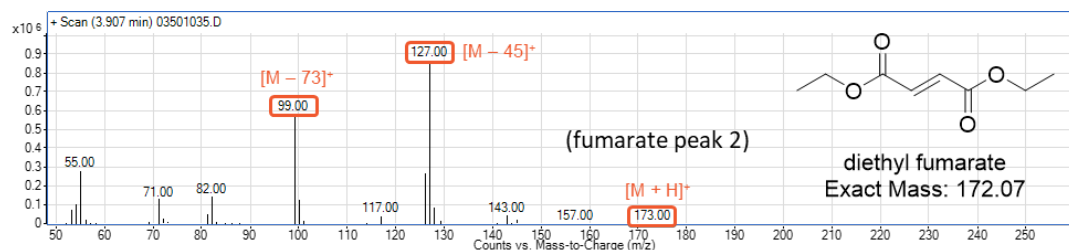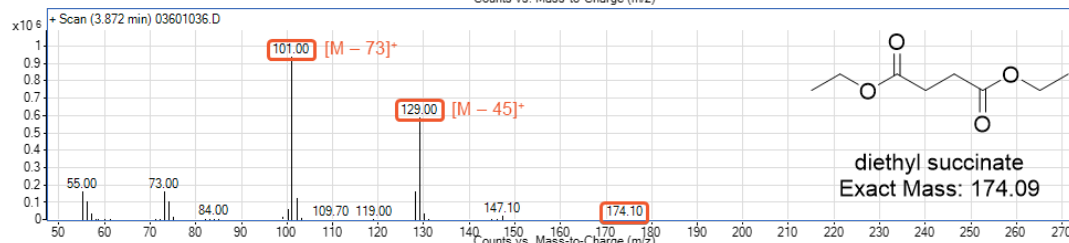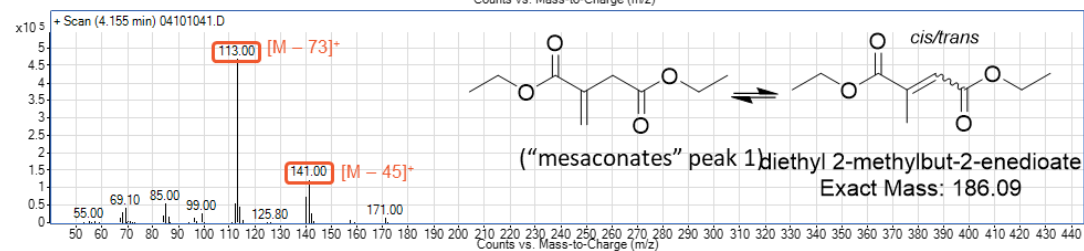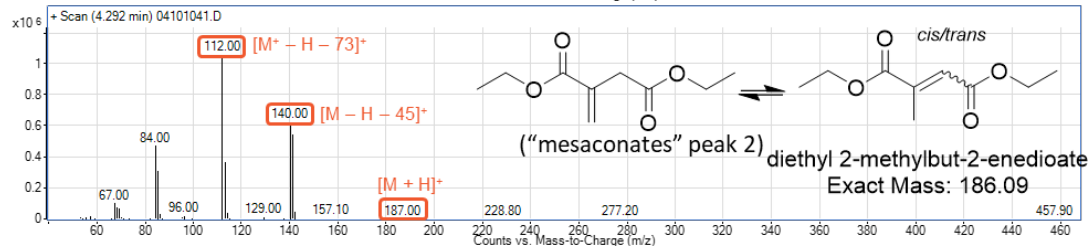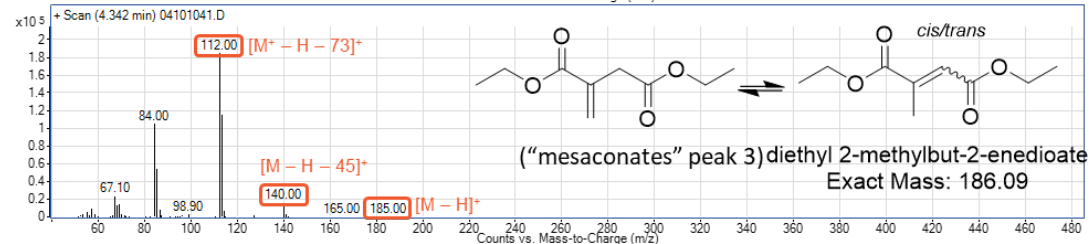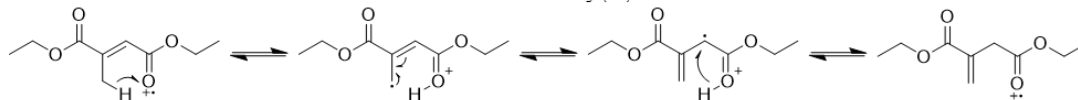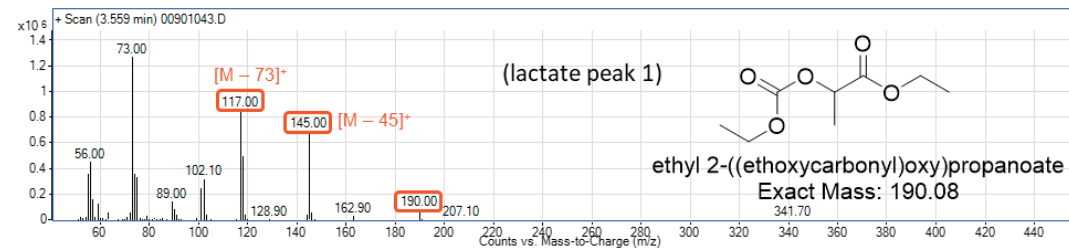

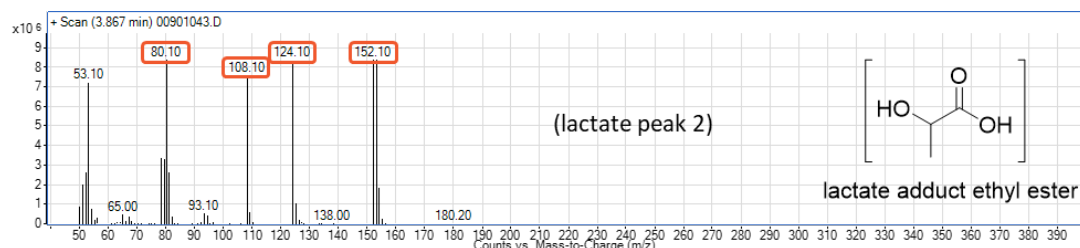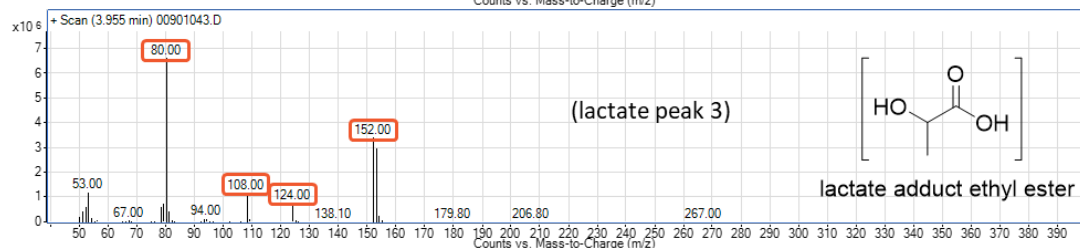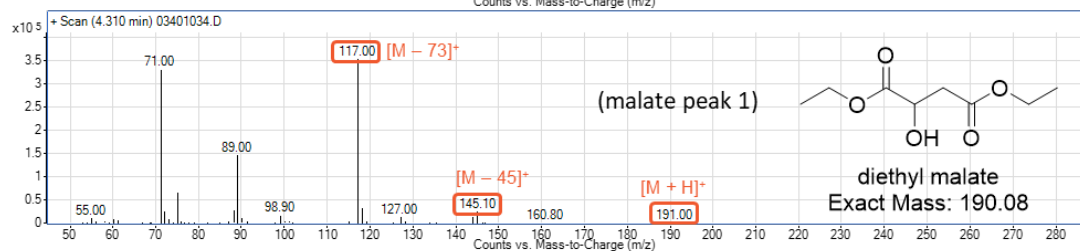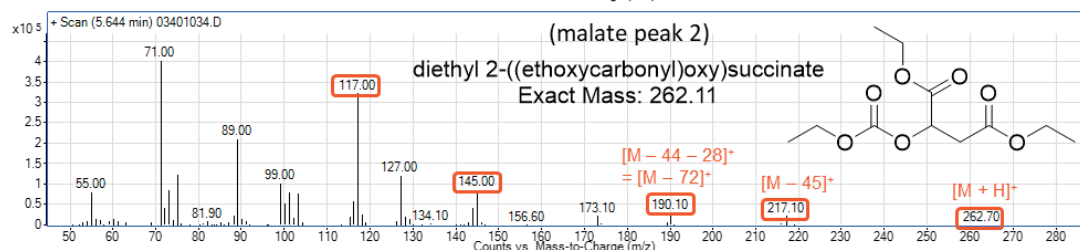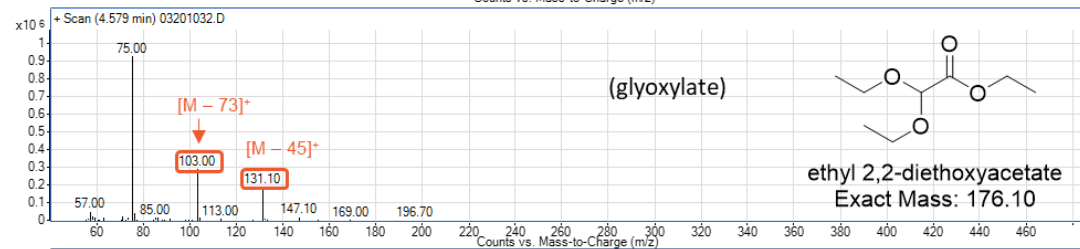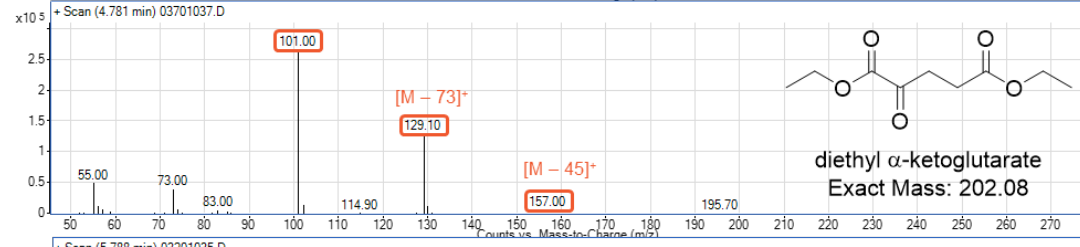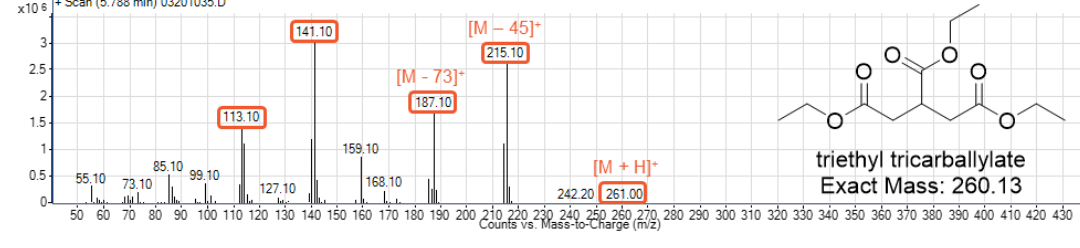

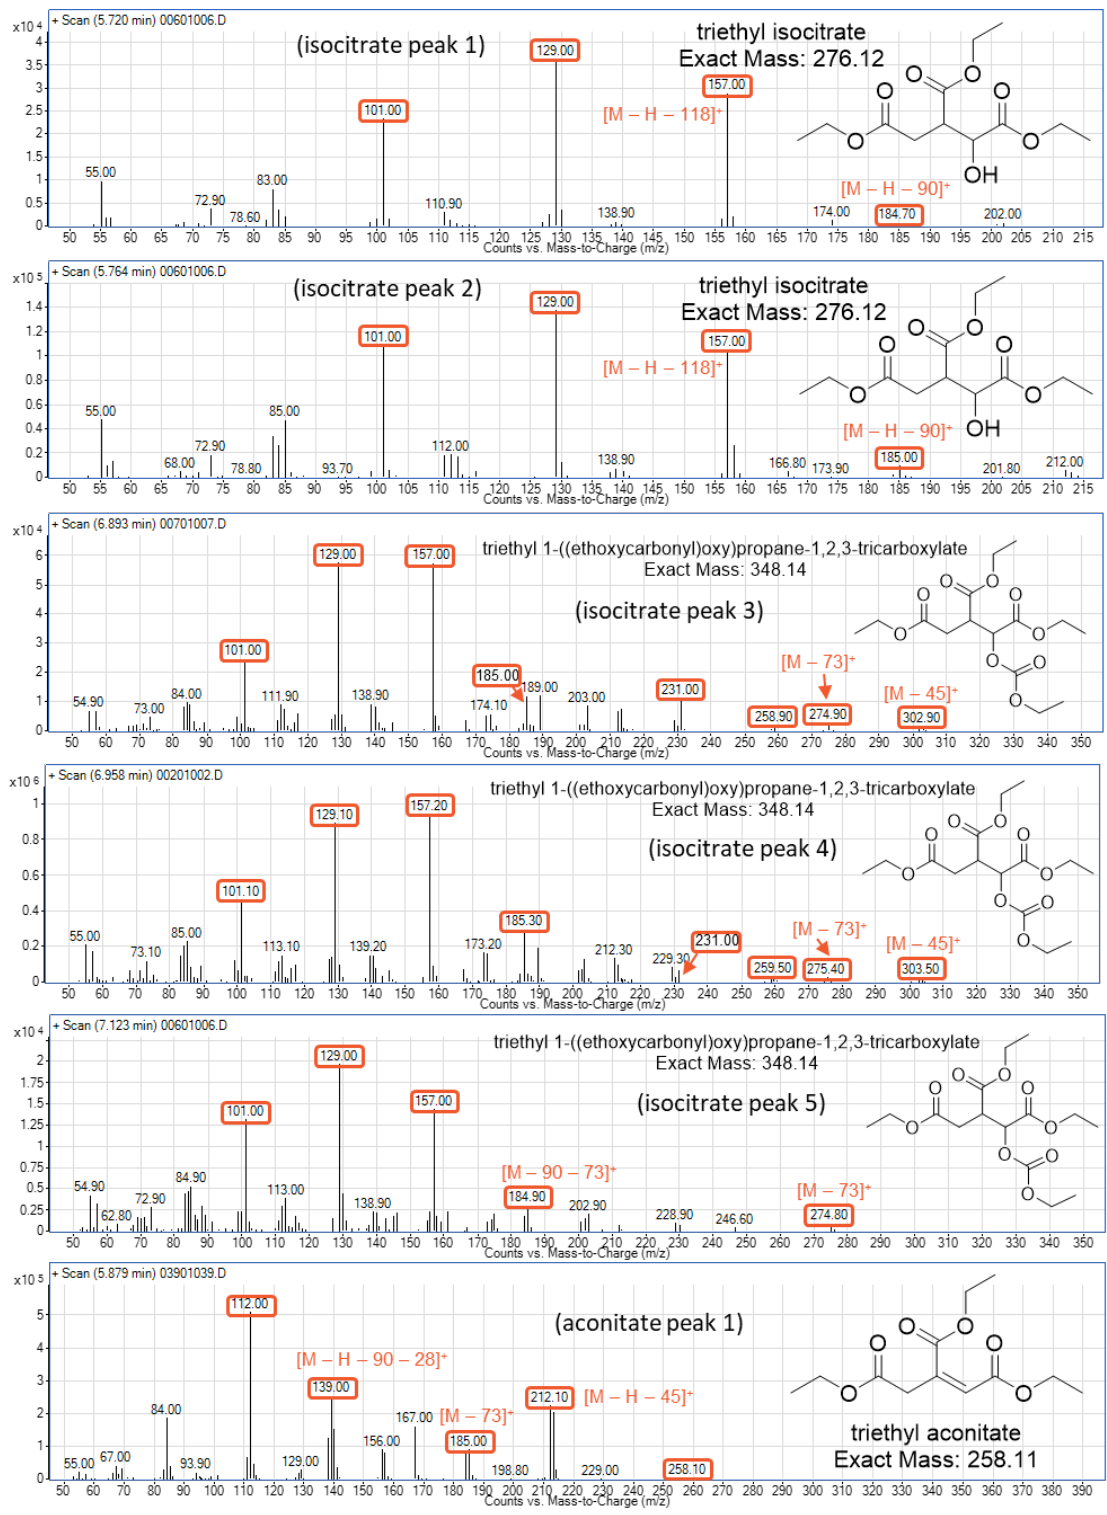

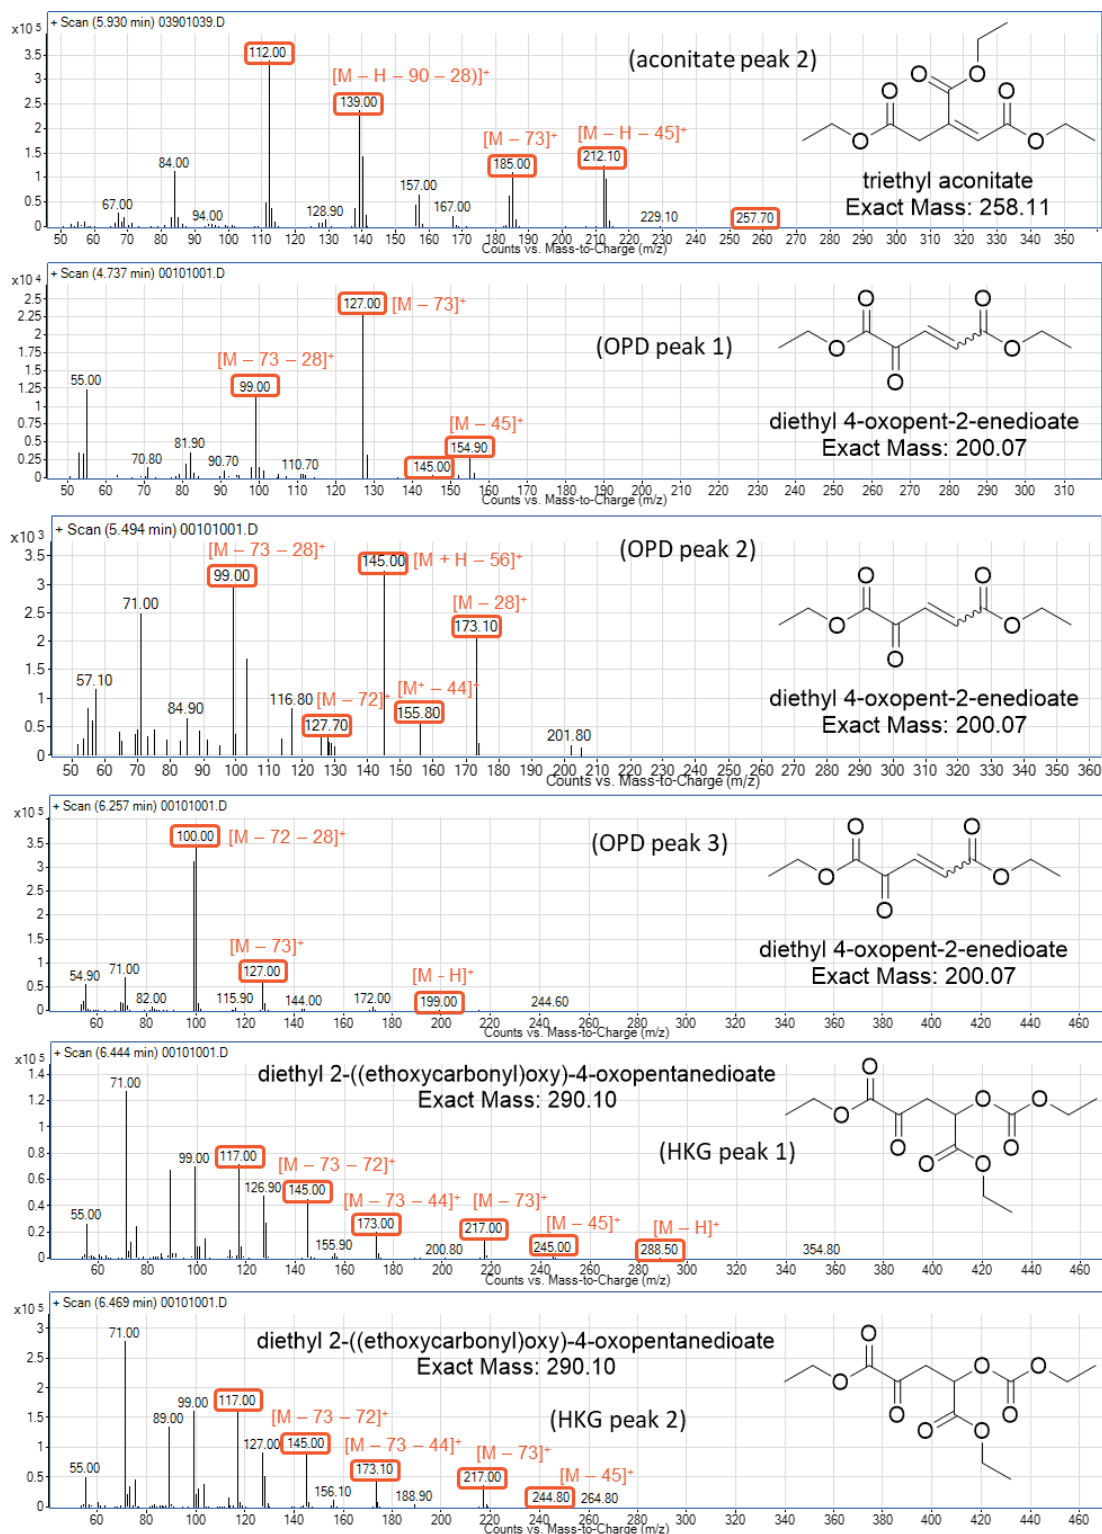

**Figure S3.**

Mass spectra of all ECF/EtOH-derivatized compounds detected in this study (authentic samples). Characteristic (“fingerprint”) peaks are highlighted in red.

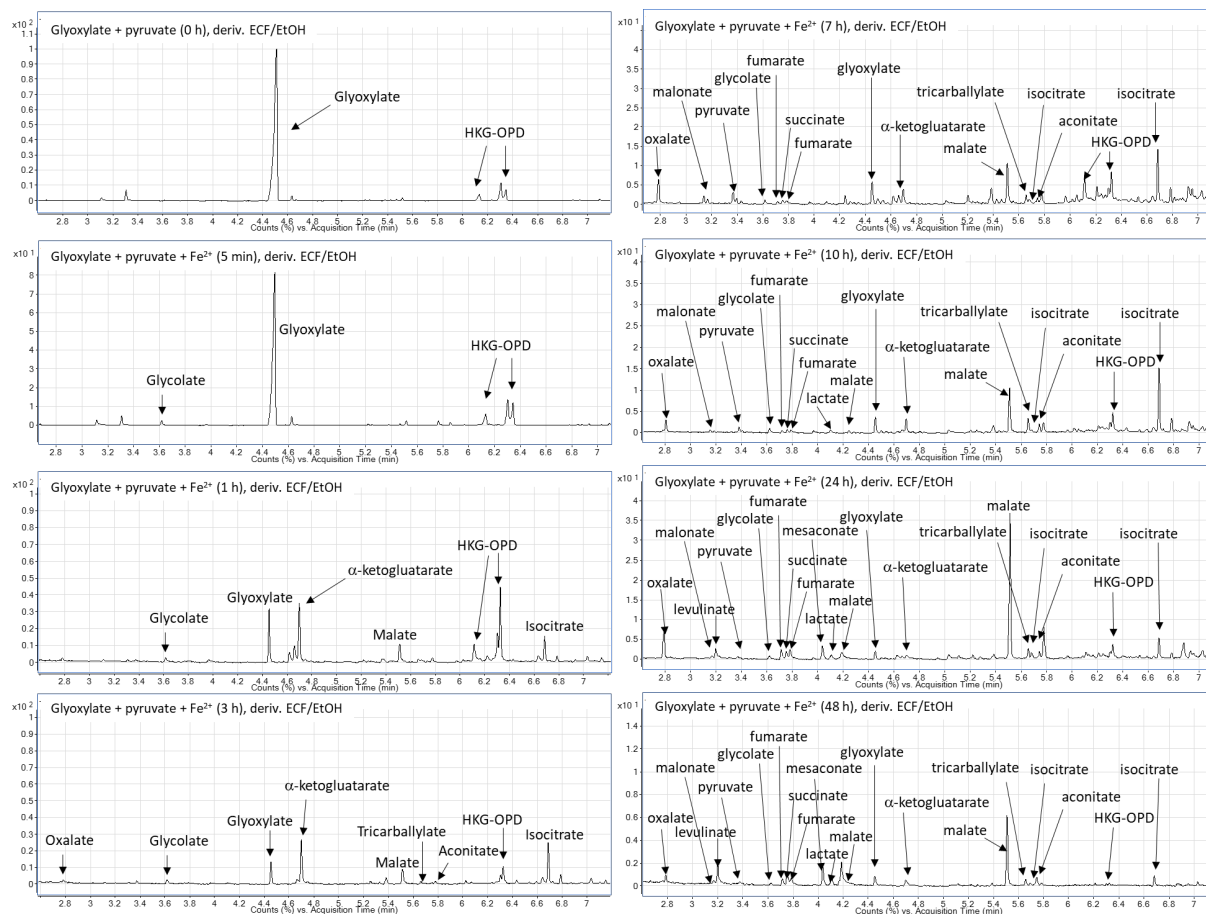

**Figure S4.**

GC chromatograms showing evolution over time of a reaction network arising from pyruvate and glyoxylate, promoted by  $\text{Fe}^{2+}$  at  $70^\circ\text{C}$ . Peaks of major interest are captioned.



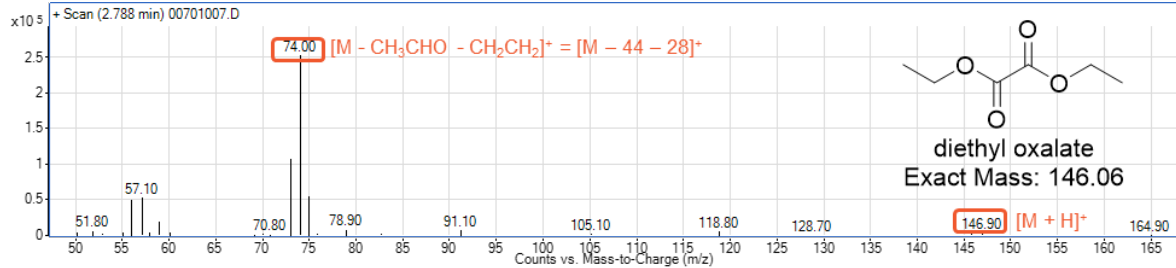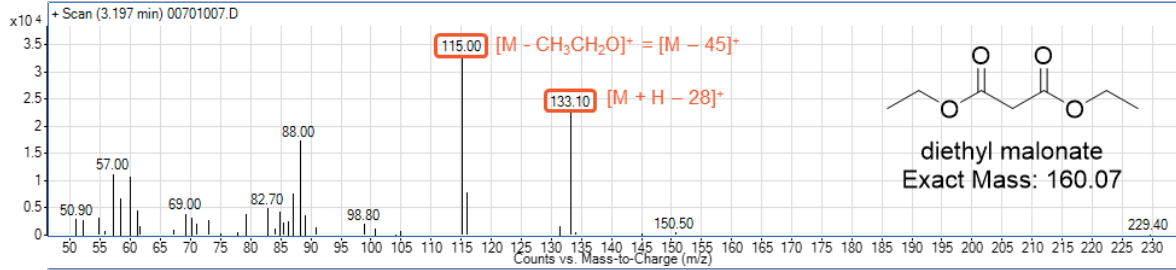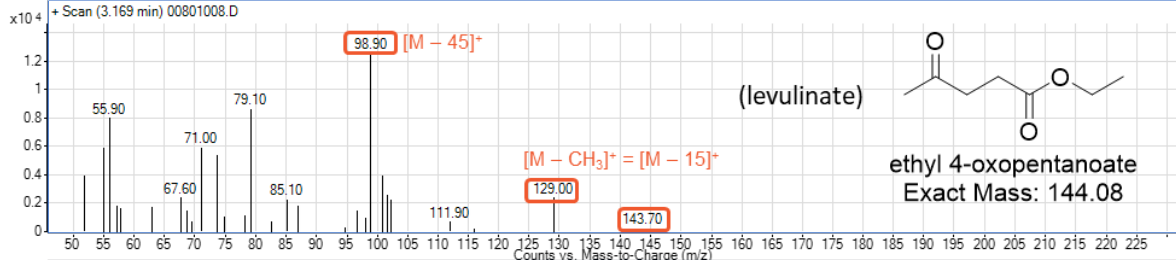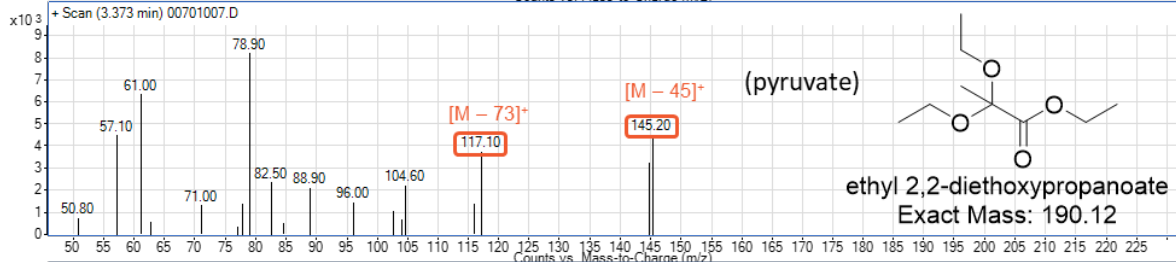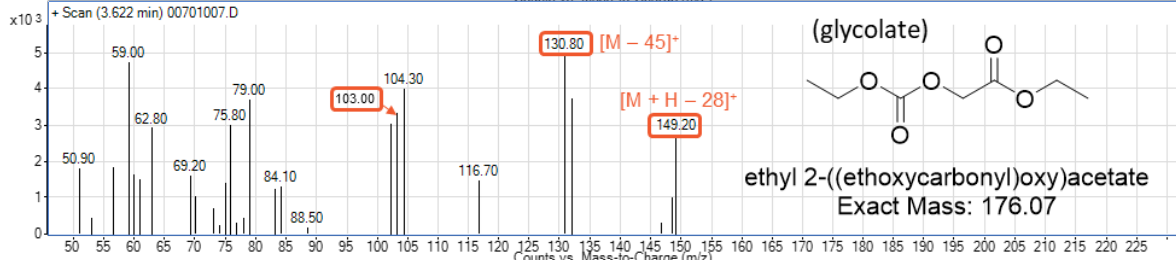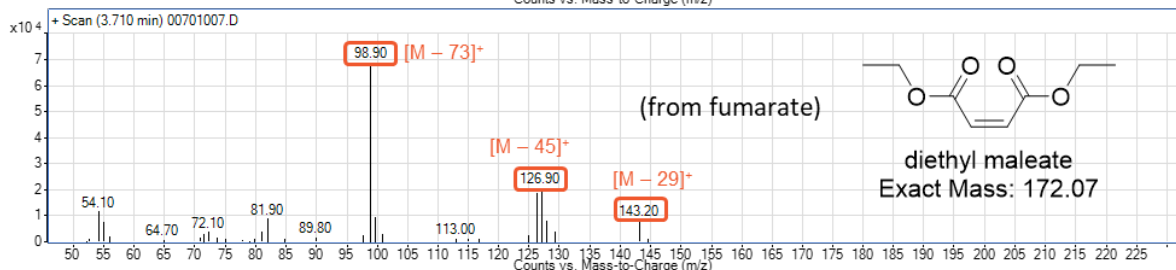

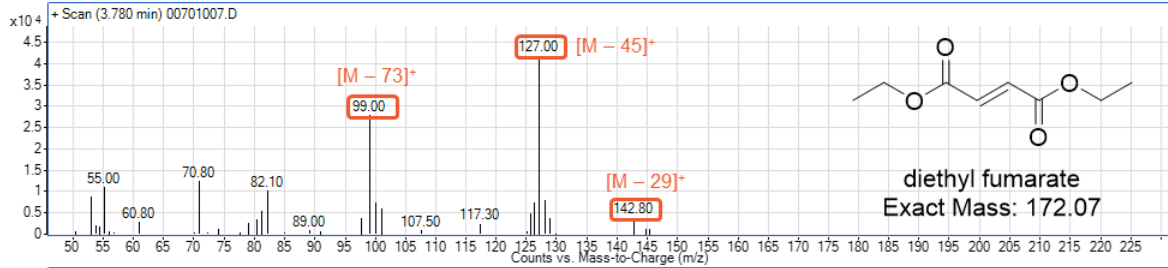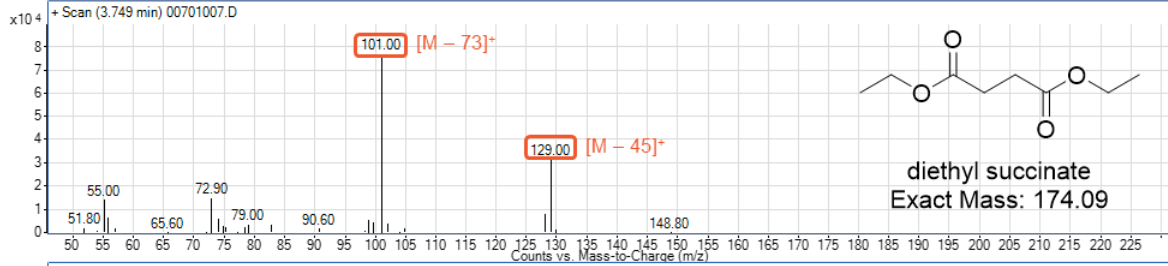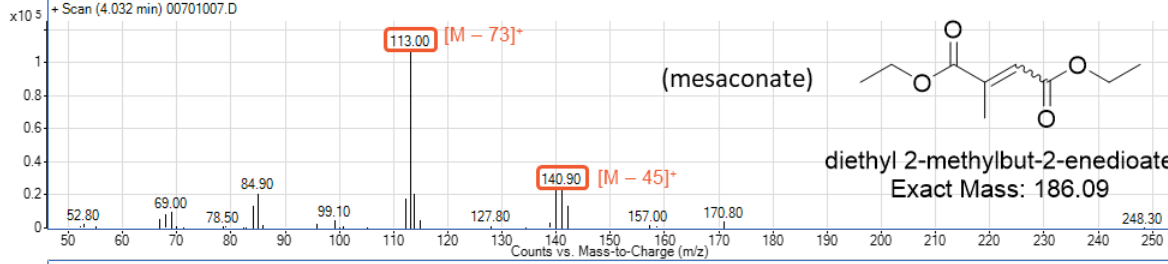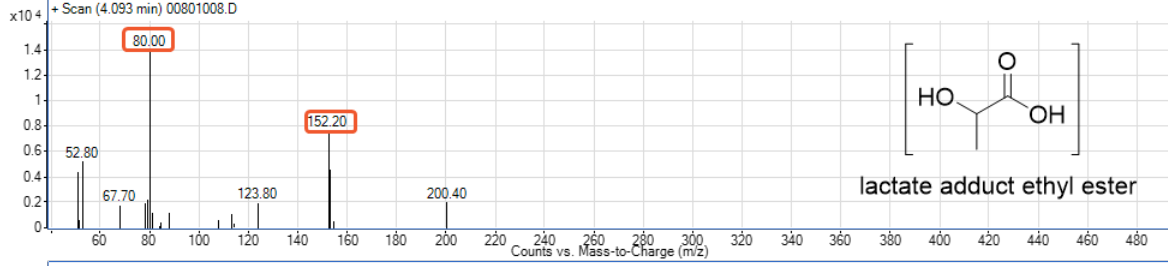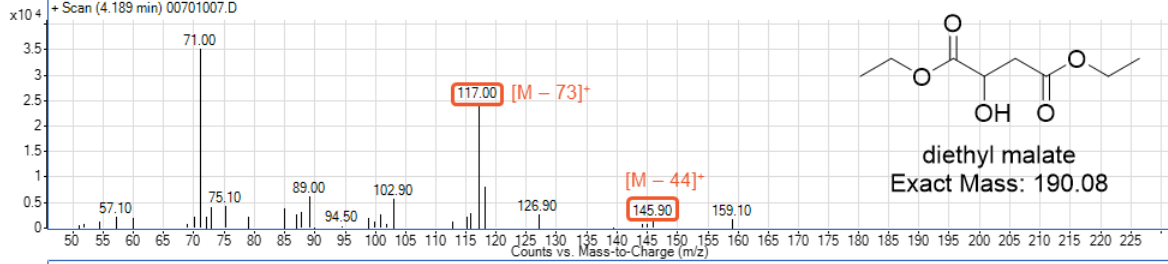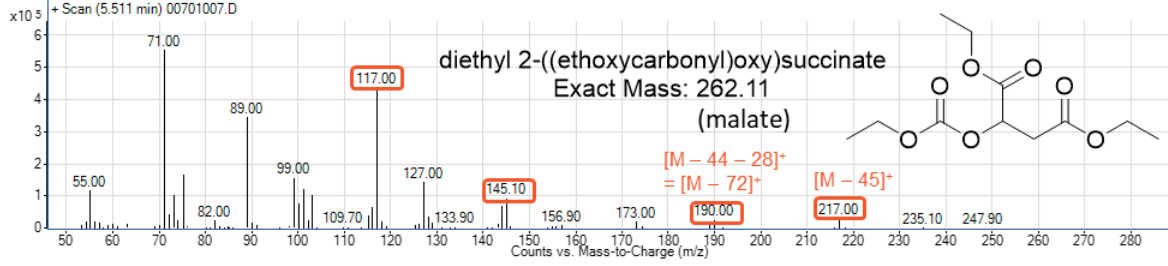

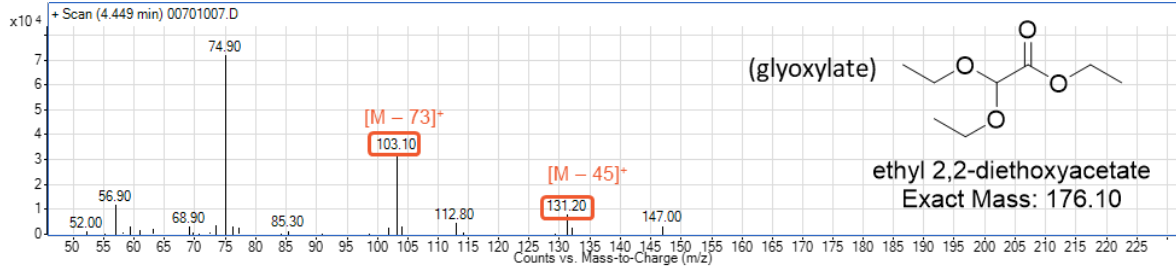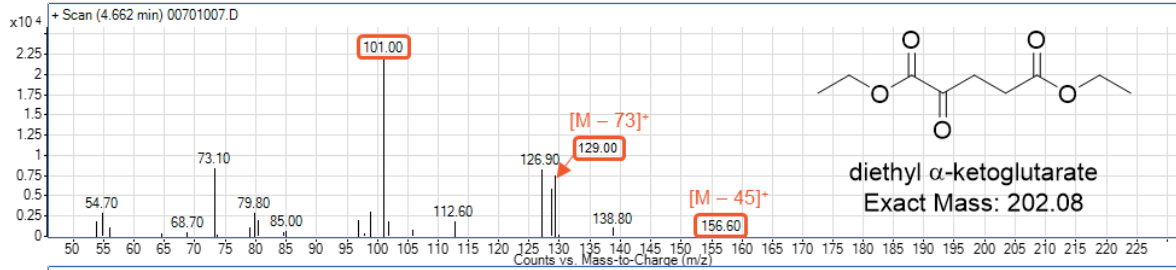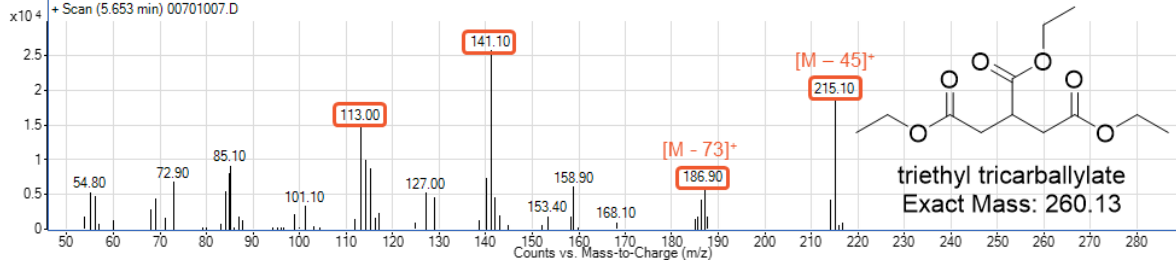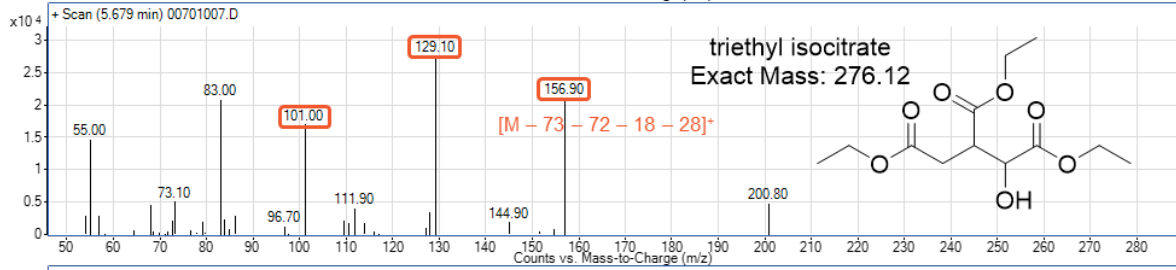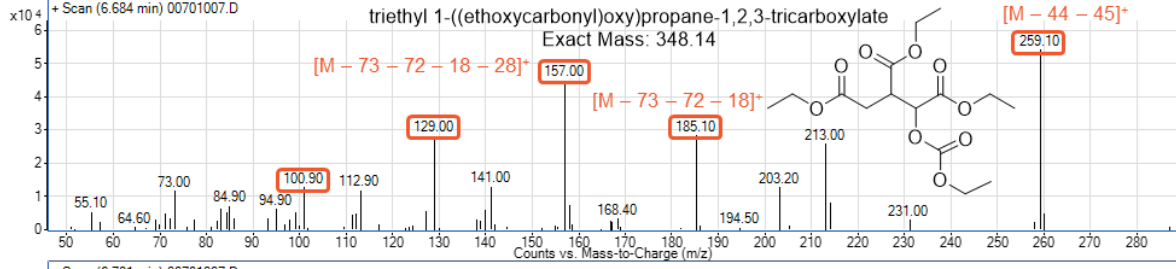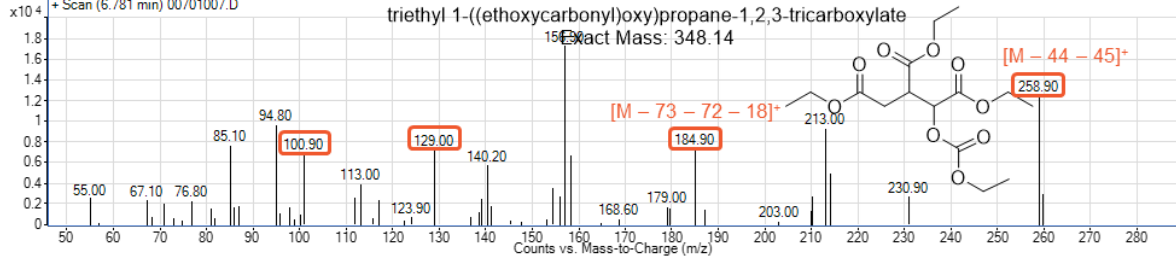

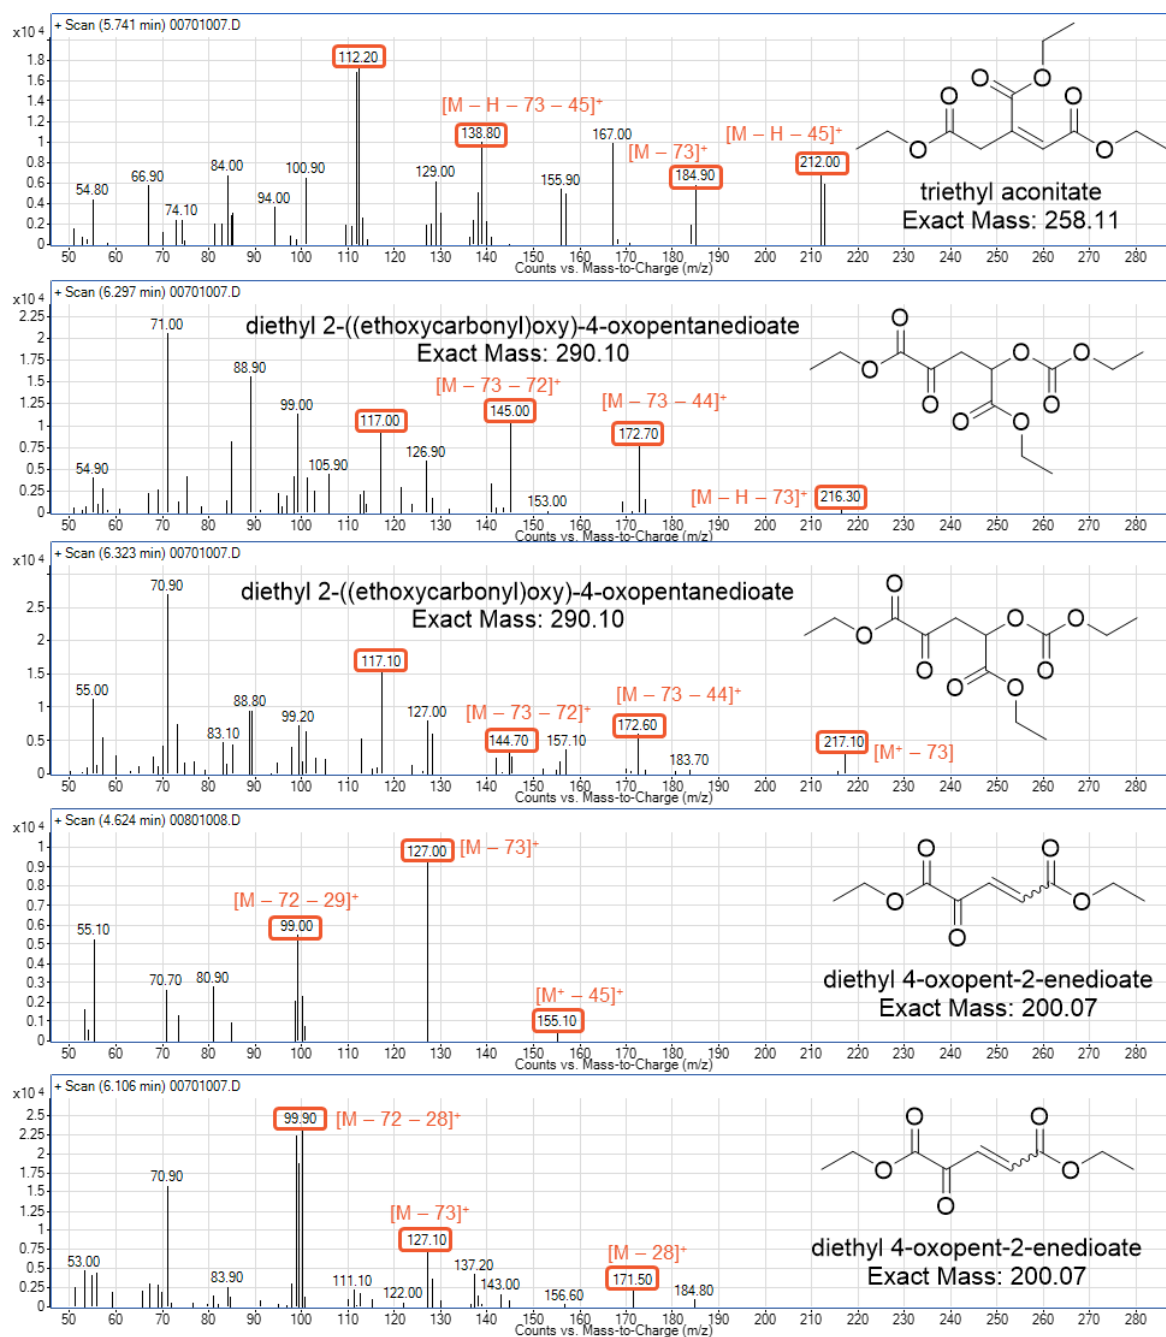

**Figure S5.**

Mass spectra of all ECF/EtOH-derivatized compounds detected at  $t = 24$  h in the reaction network arising from pyruvate and glyoxylate, promoted by  $\text{Fe}^{2+}$  at  $70^\circ\text{C}$ . Characteristic (“fingerprint”) peaks are highlighted in red.

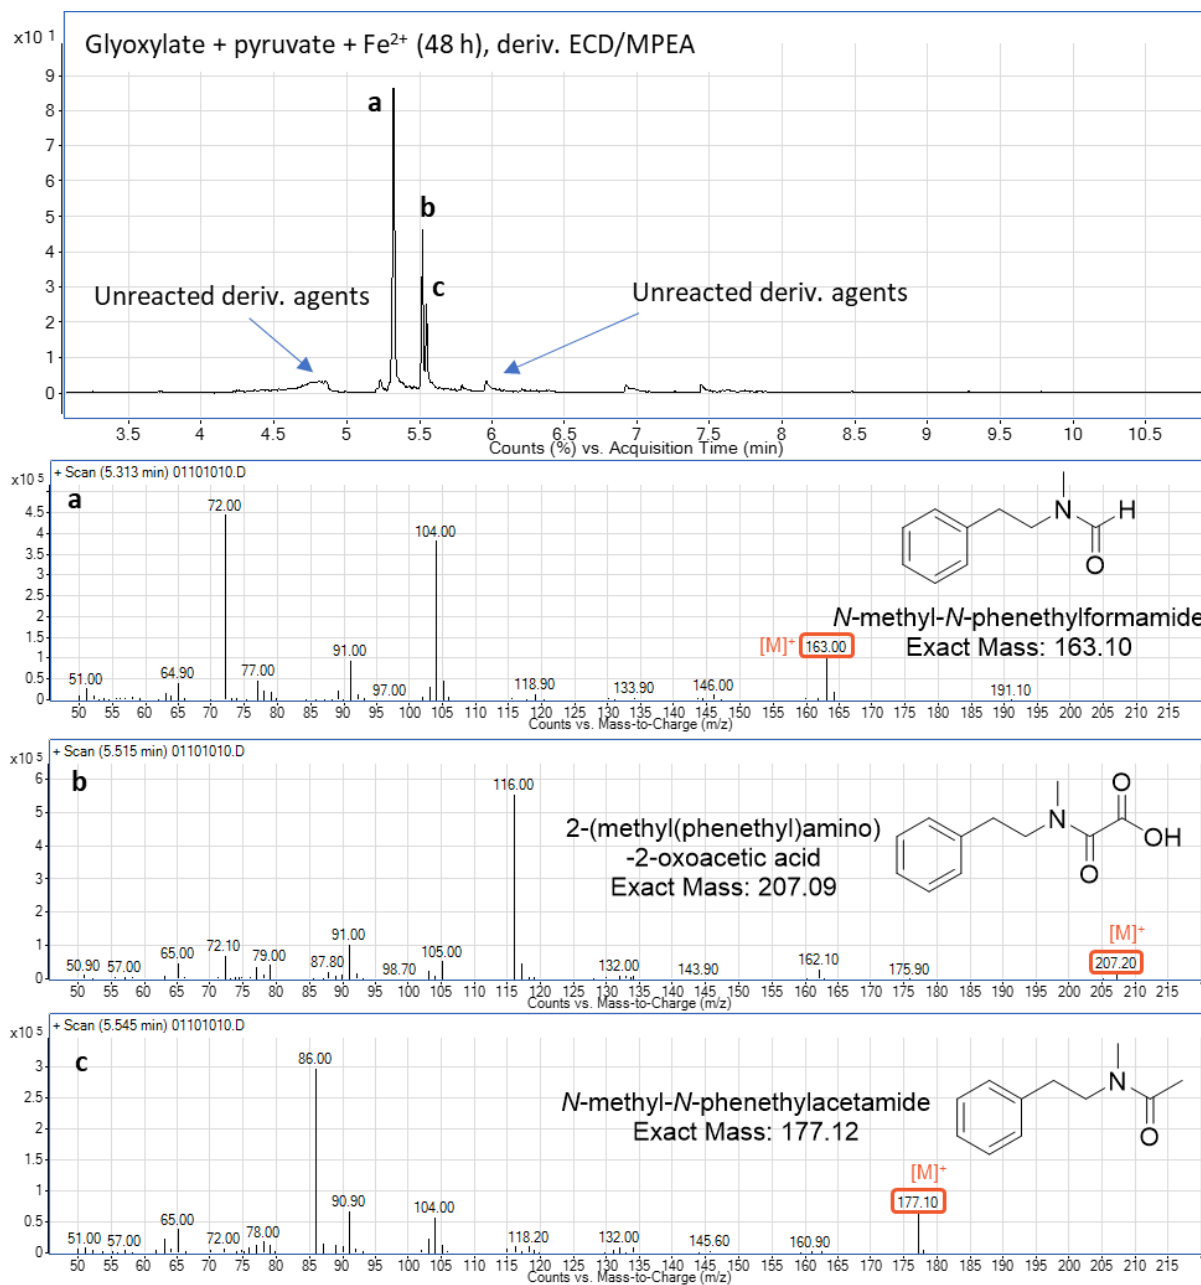

**Figure S6**

GC chromatogram and mass spectra confirming the presence of formate, oxalate and acetate, detected as their *N*-methyl-*N*-phenethylamides, after derivatization of a typical reaction mixture with ECD/MPEA after 48 h reaction time.

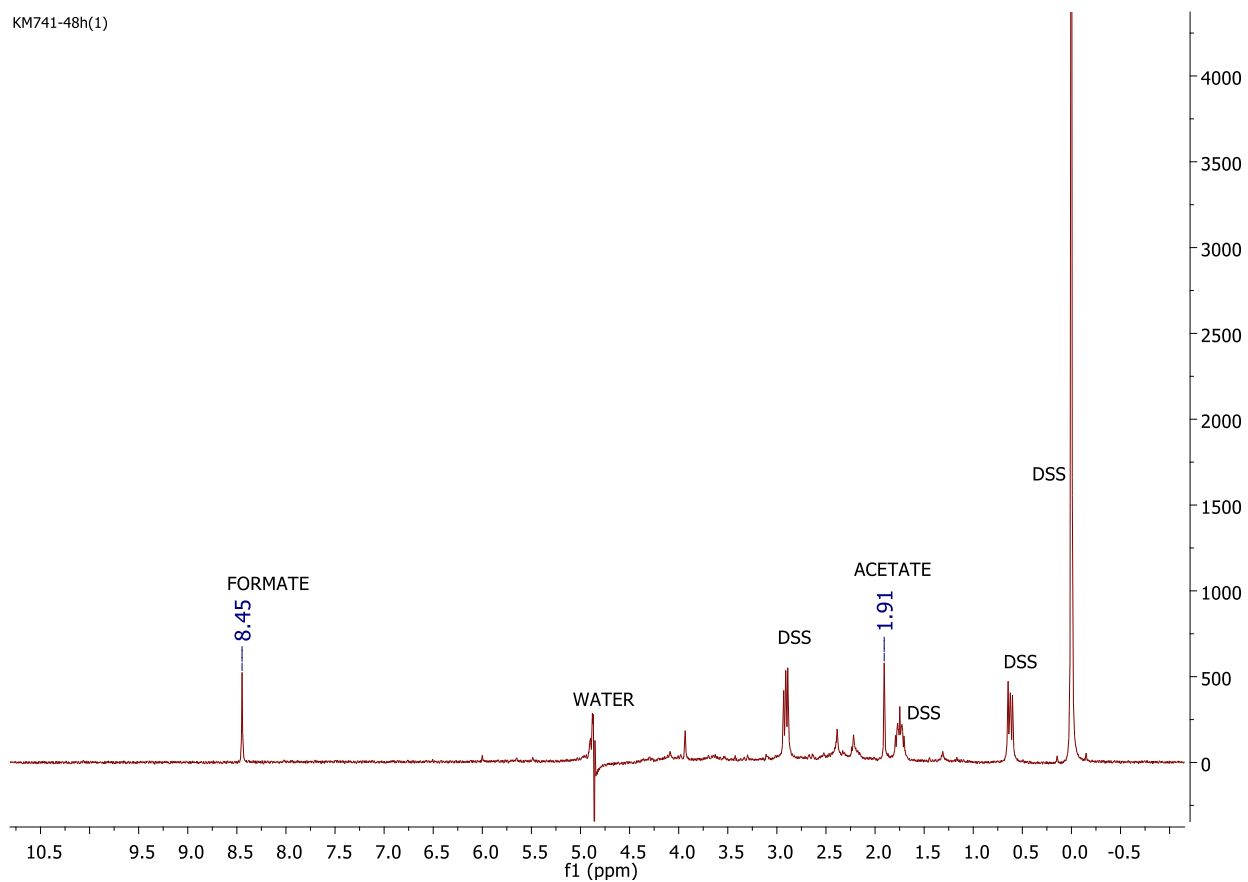

**Figure S7.**

<sup>1</sup>H NMR spectrum of a typical reaction mixture after 48 h, confirming the presence of formate and acetate (DSS was used as standard).

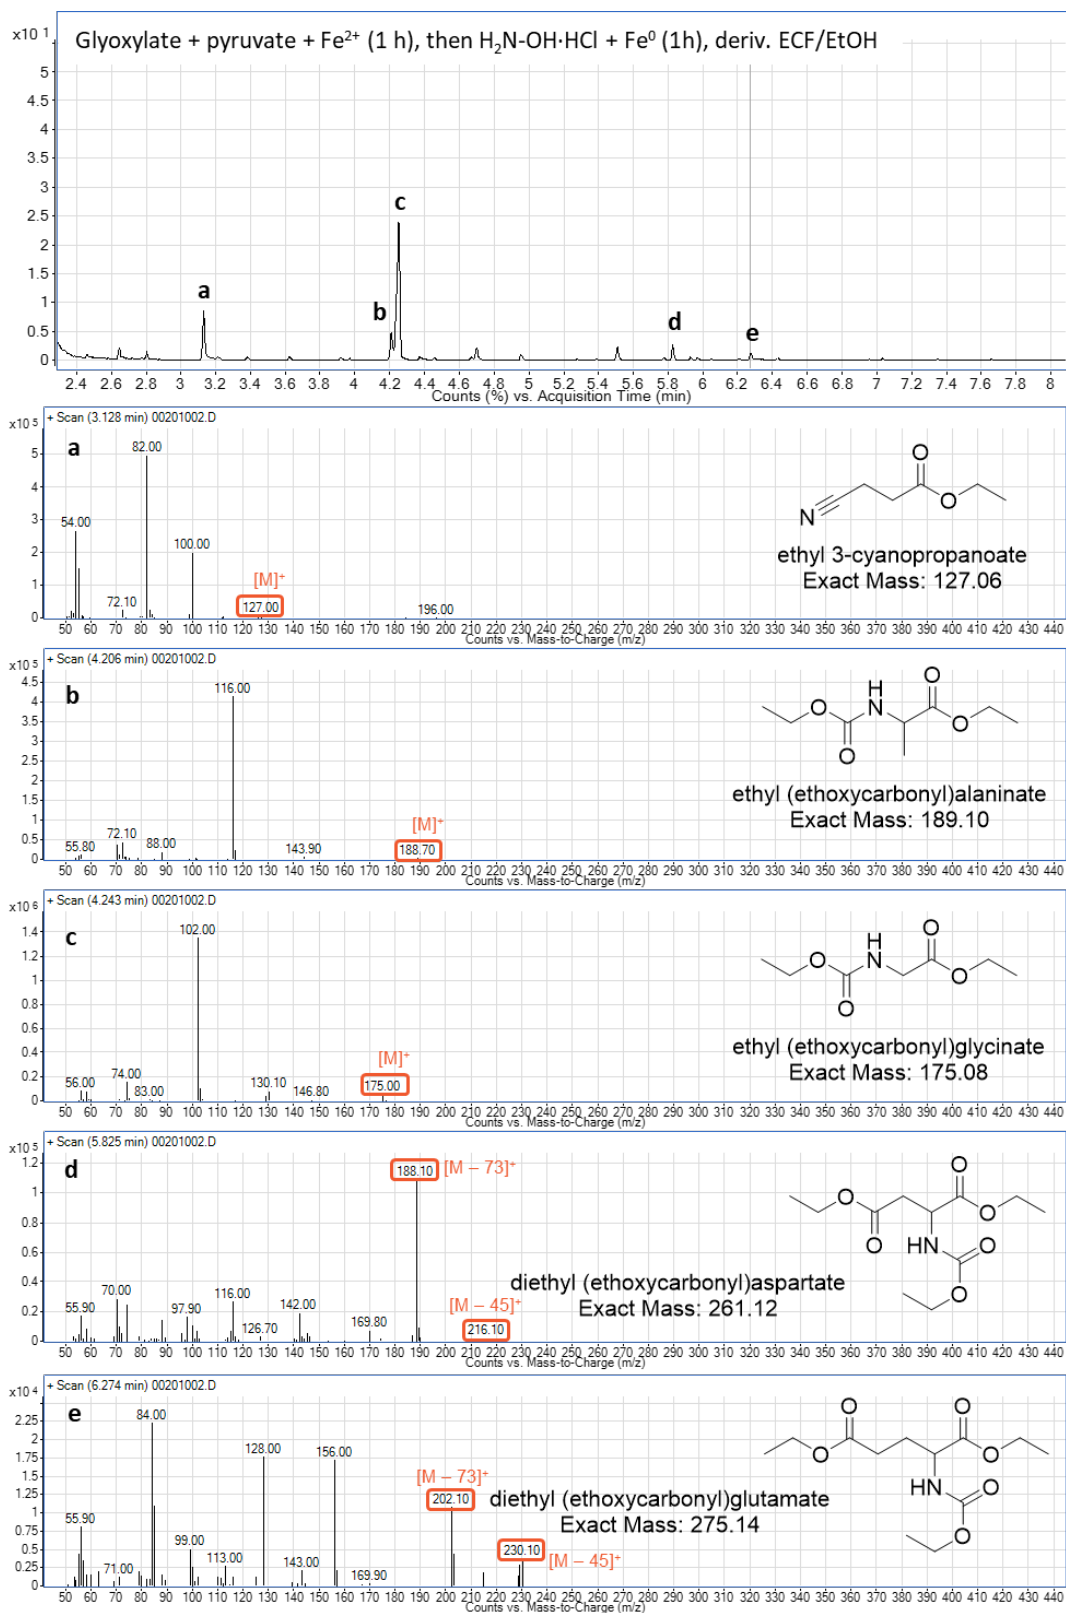

**Figure S8.**

GC chromatogram and mass spectra confirming the presence of glycine, alanine, aspartic acid and glutamic acid, after derivatization of a reaction mixture with ECF/EtOH.

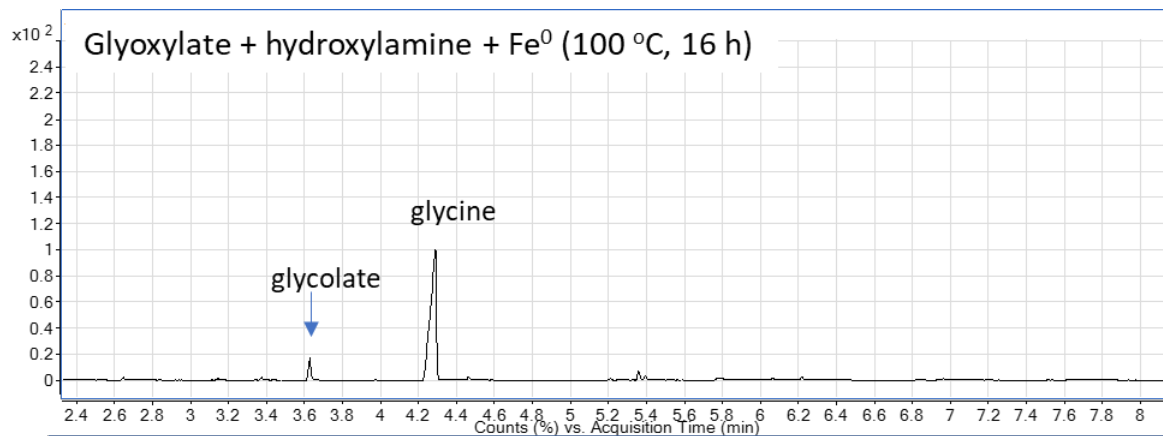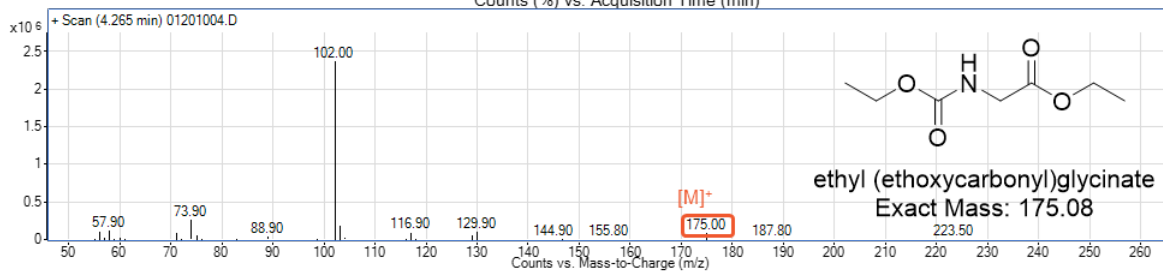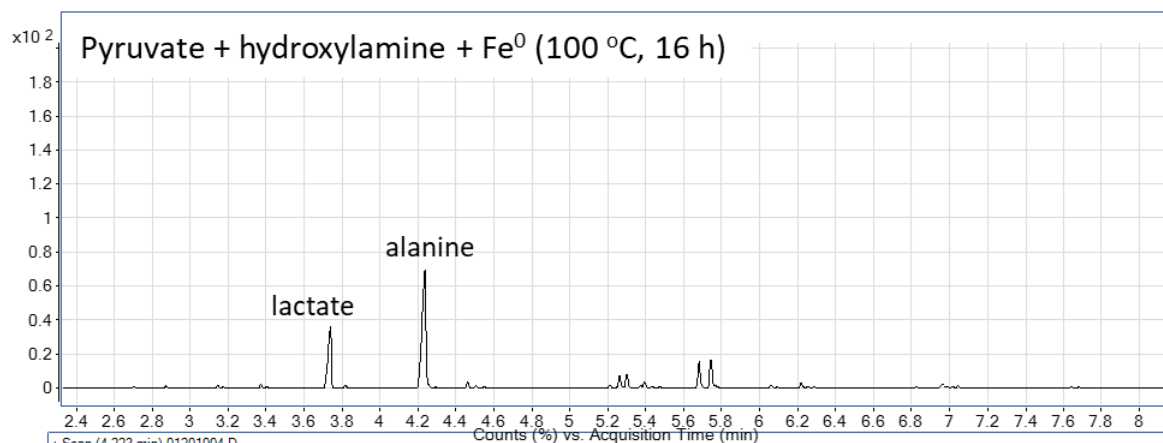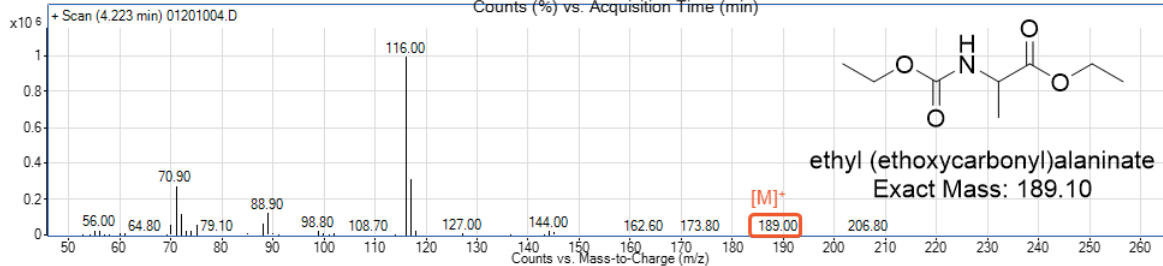



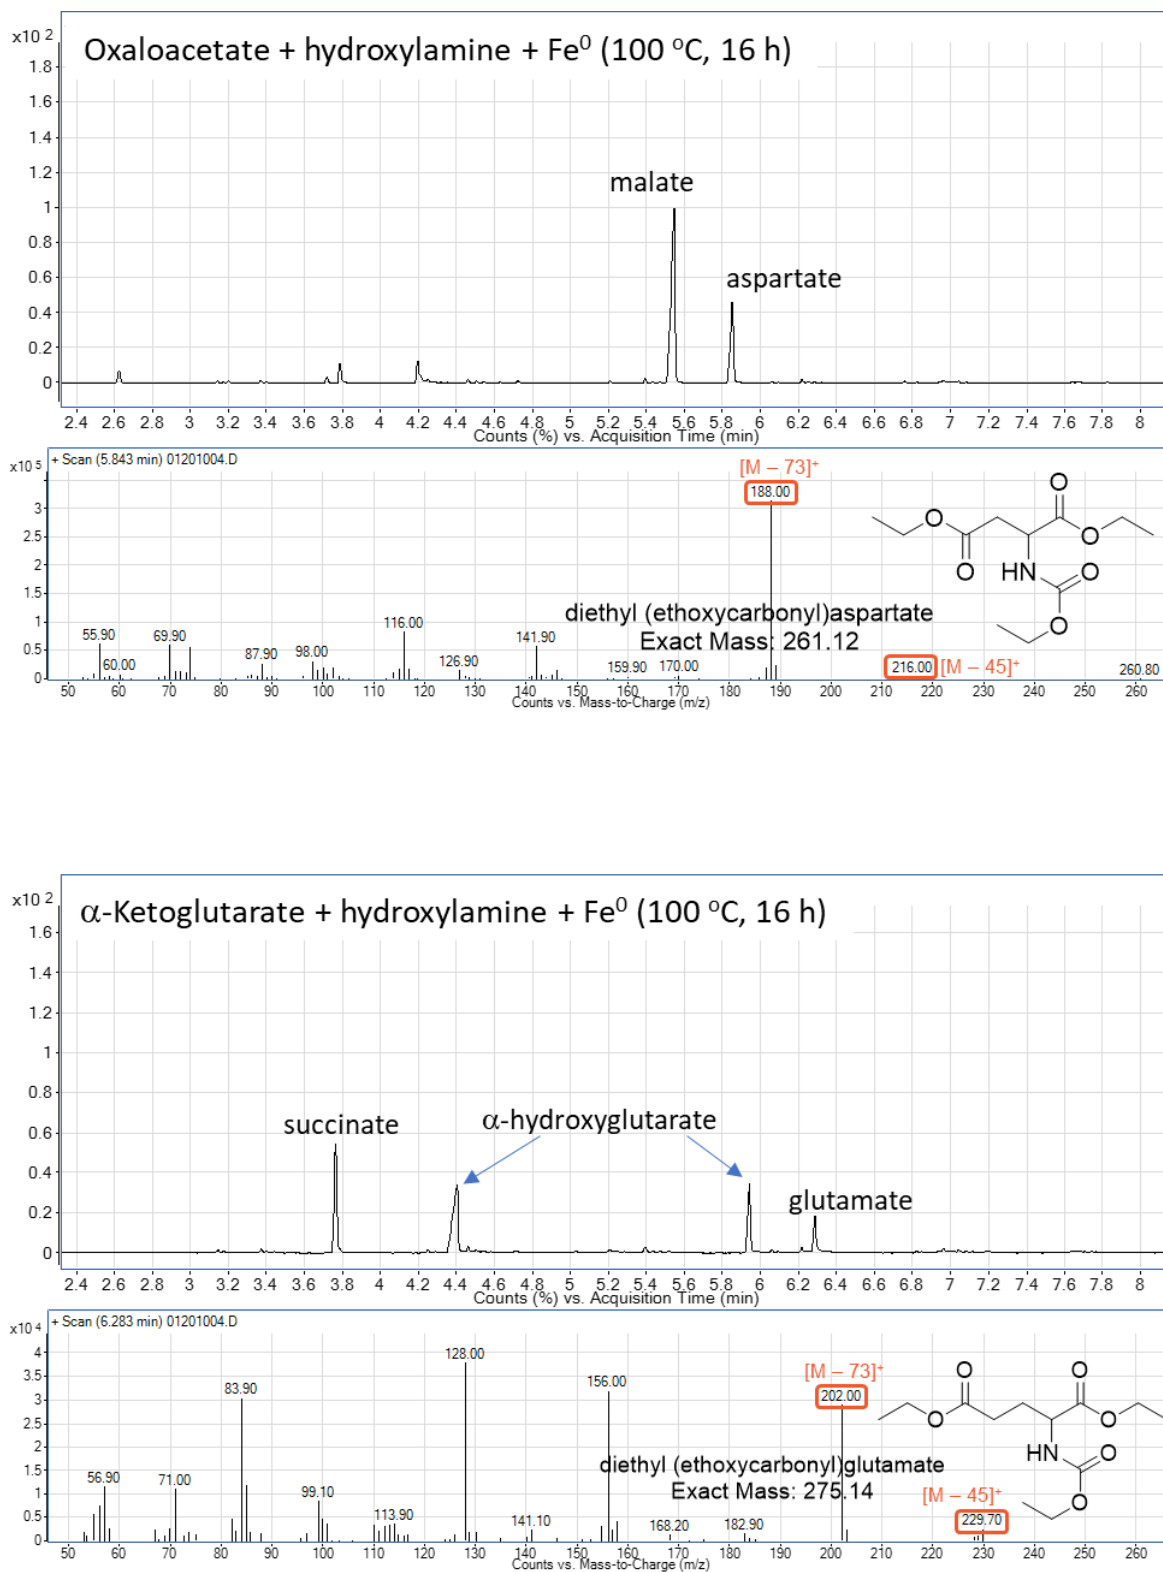

**Figure S9.**

GC chromatograms and mass spectra of ECF/EtOH-derivatized amino acids arising from different ketoacids, hydroxylamine and Fe<sup>0</sup> at 100 °C after 16 h.

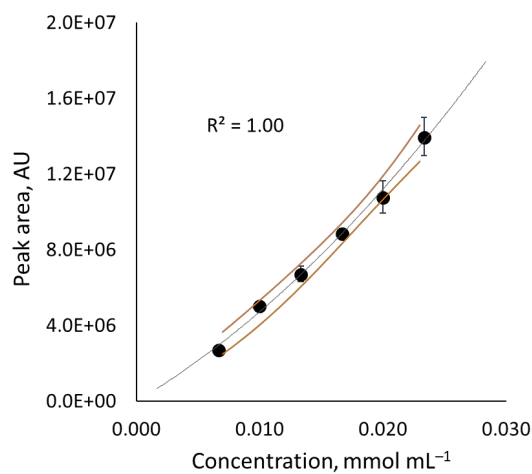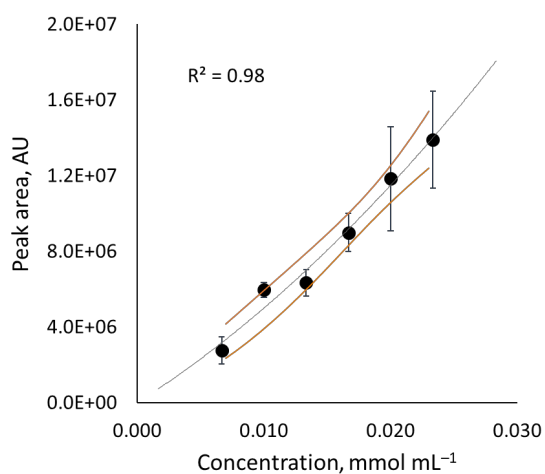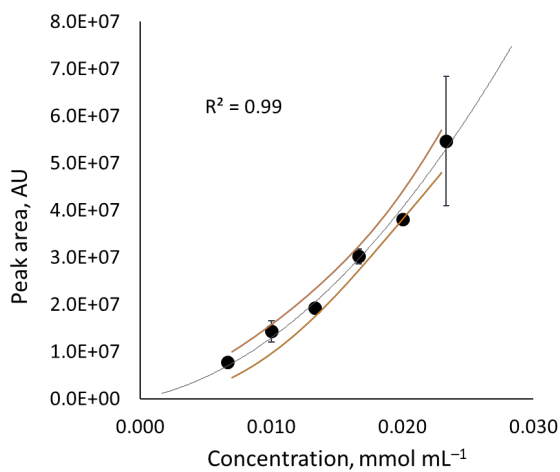

**Figure S10.**

Correlation between the concentration of an aqueous solution of amino acids (glycine, aspartic acid and glutamic acid) and the measured gas chromatography peak area. 95% confidence bounds computed for 2<sup>nd</sup> degree polynomial fits (*OriginPro*) are shown as orange lines.

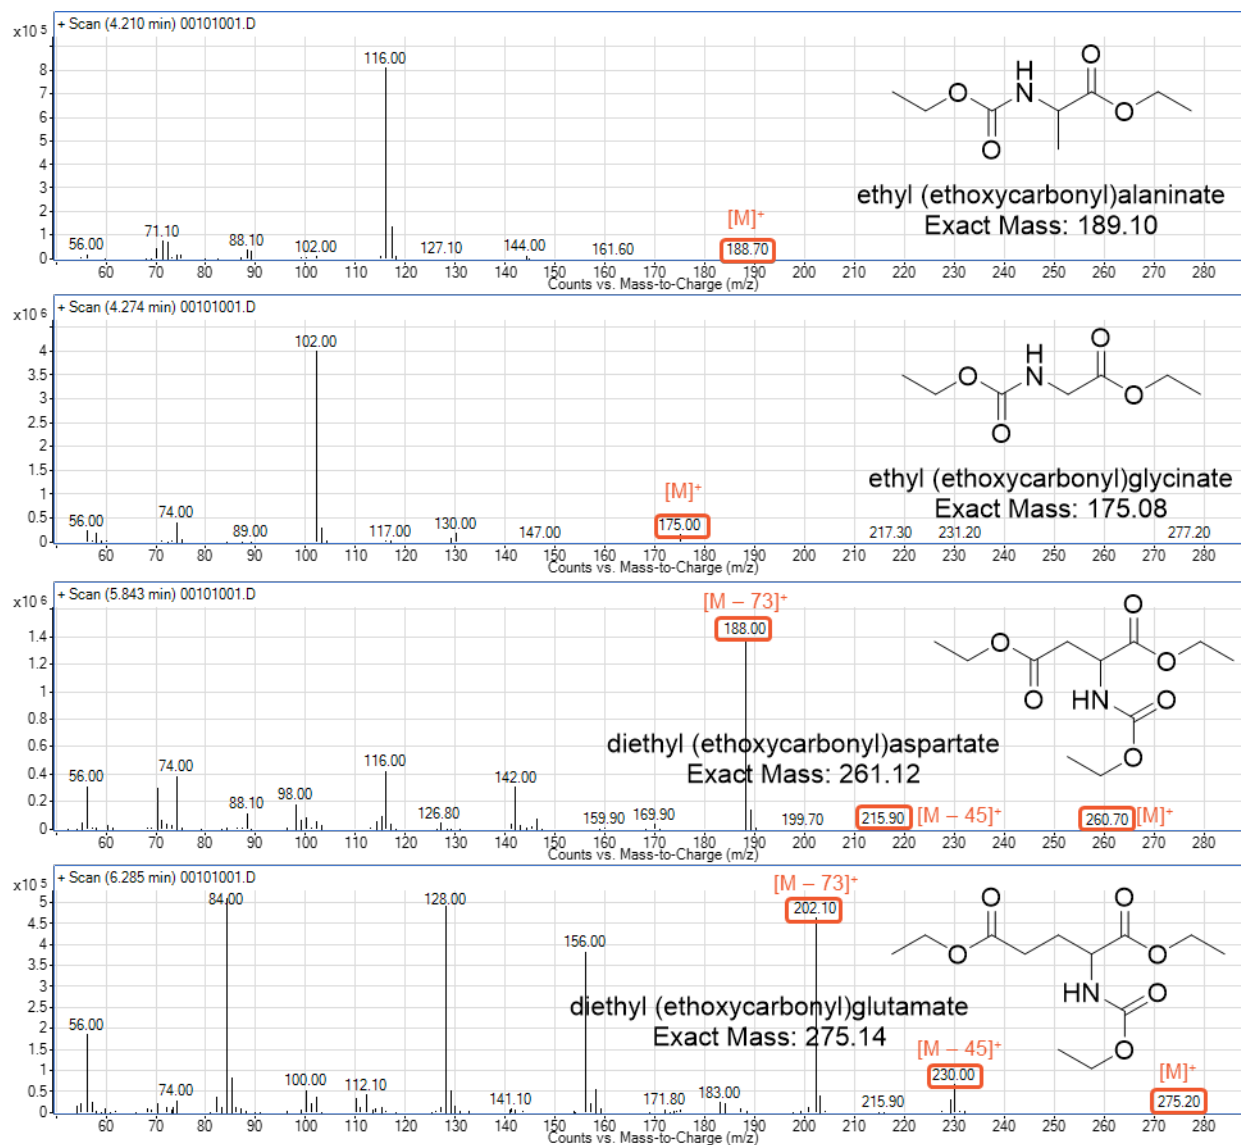

**Figure S11.**

Mass spectra of authentic samples of glycine, alanine, aspartic acid and glutamic acid, after derivatization with ECF/EtOH.

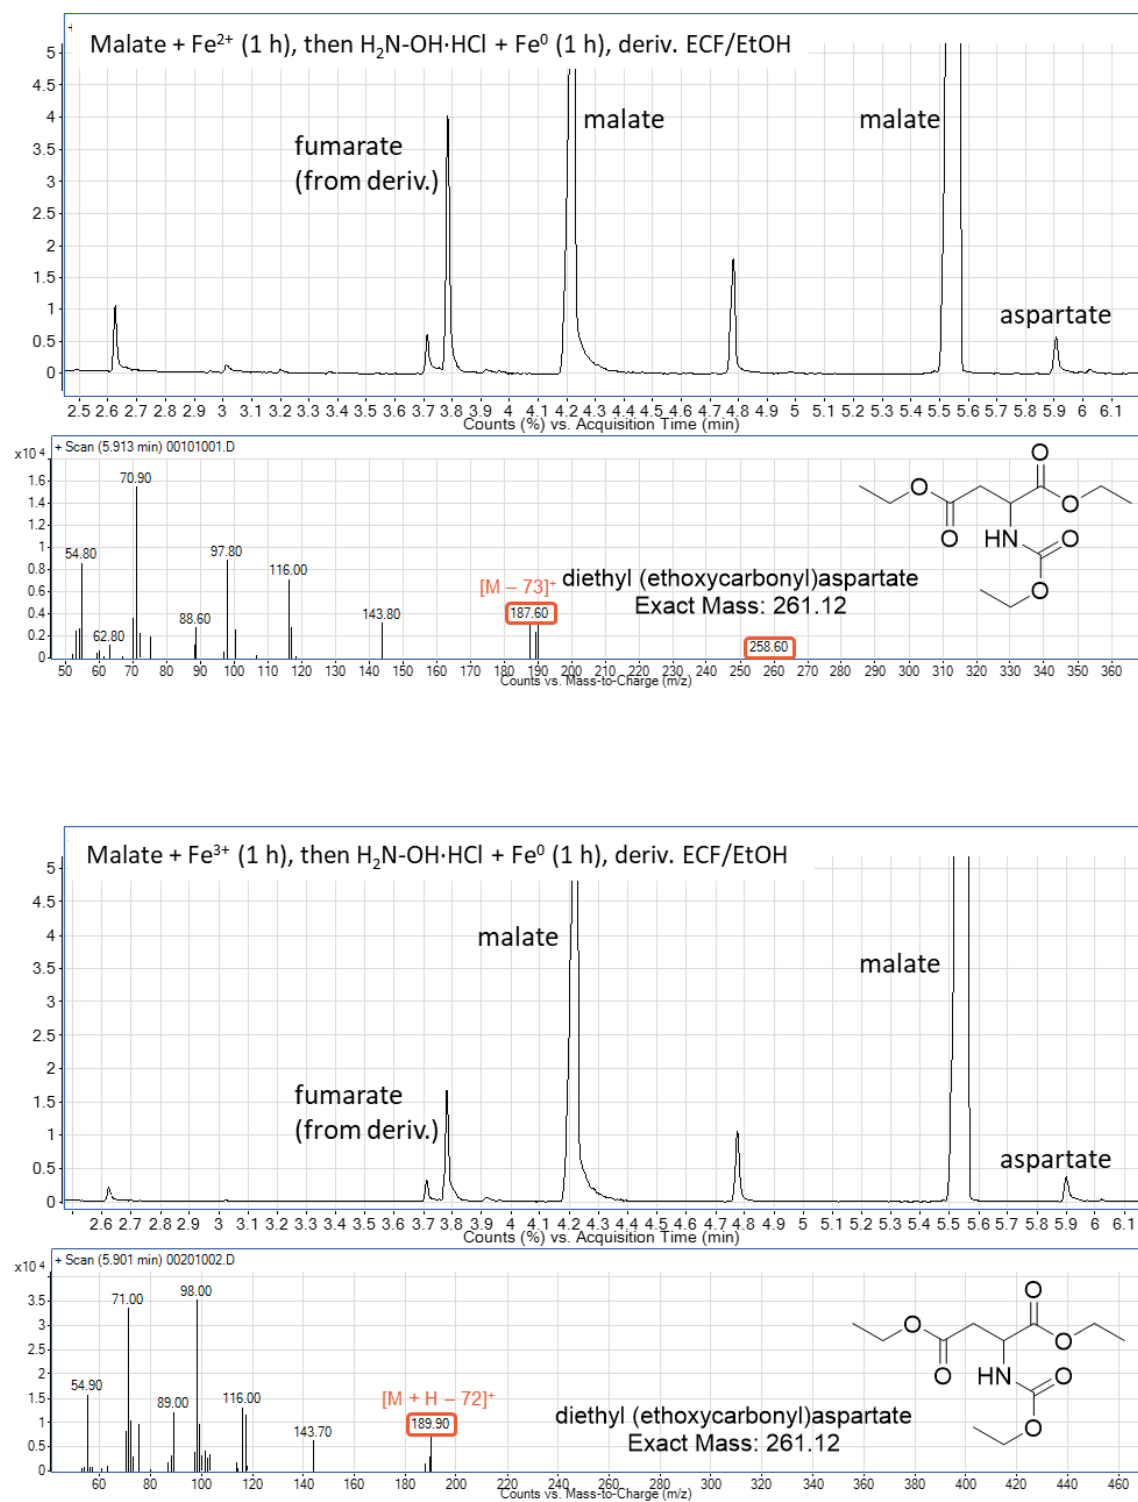

**Figure S12**

GC chromatograms of control reactions (malate + Fe<sup>2+</sup> or Fe<sup>3+</sup>, then reductive amination with hydroxylamine), after derivatization of the reaction mixture with ECF/EtOH.

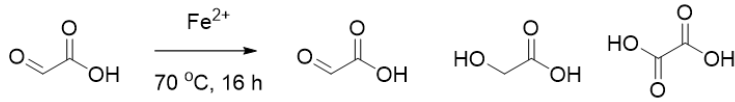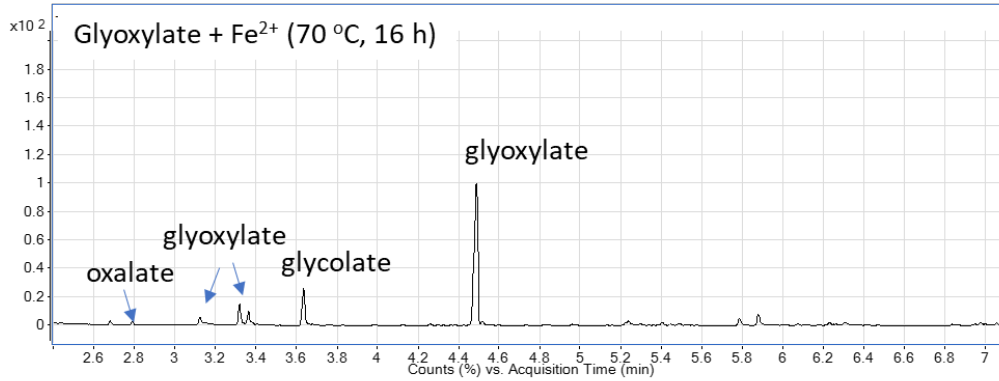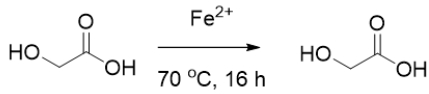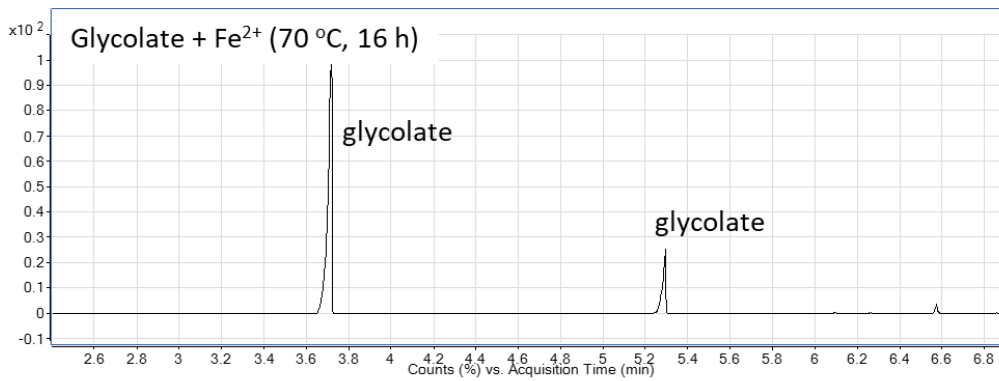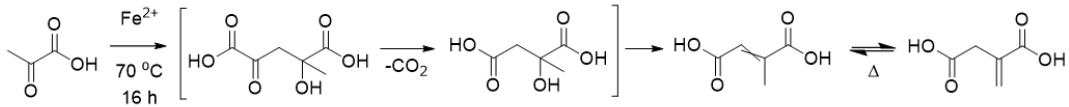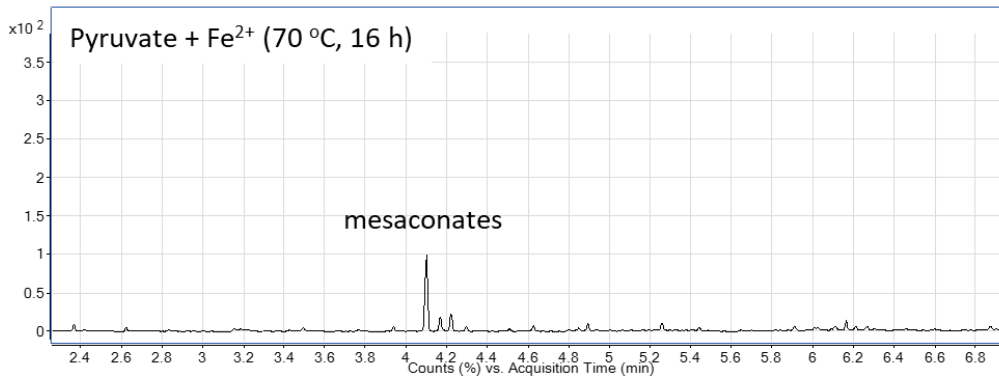

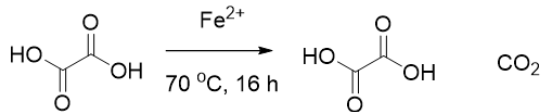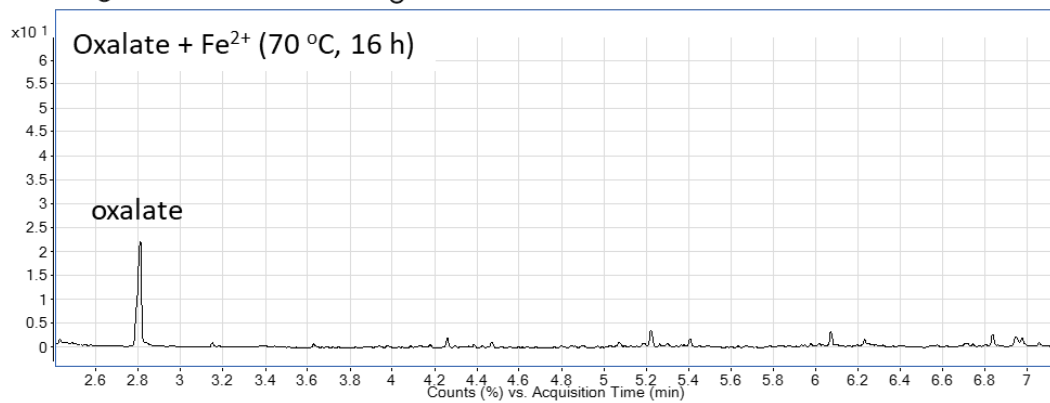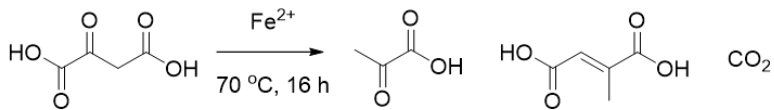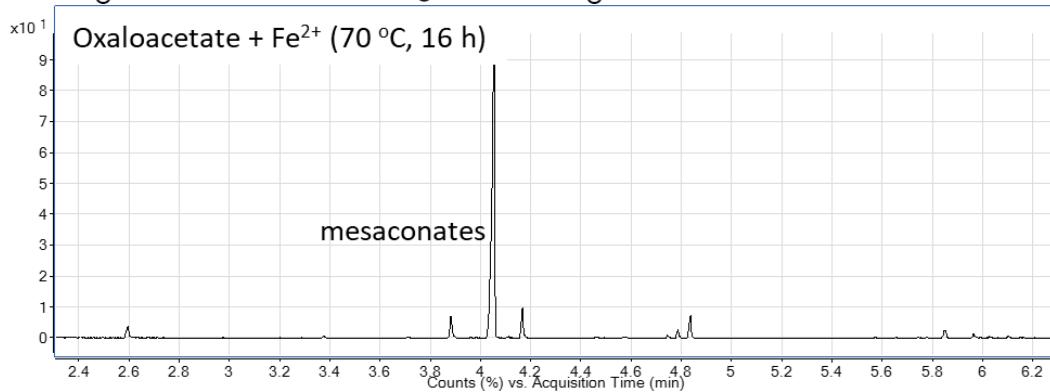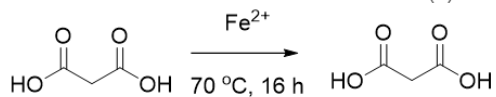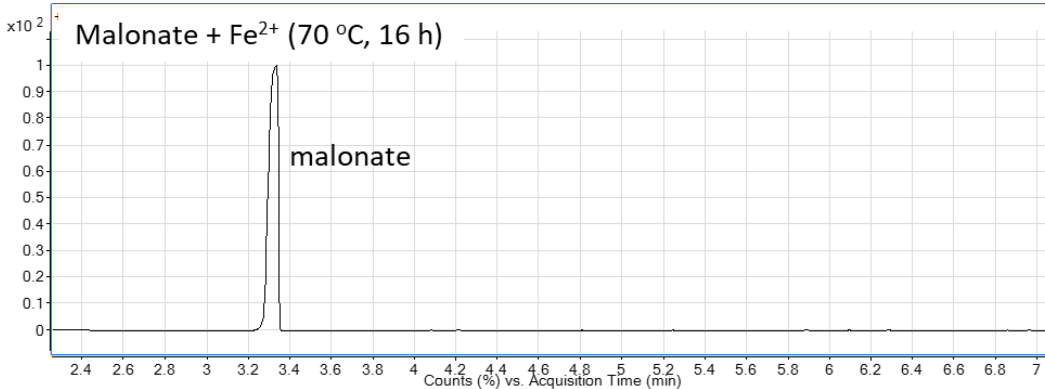

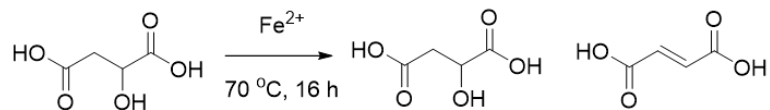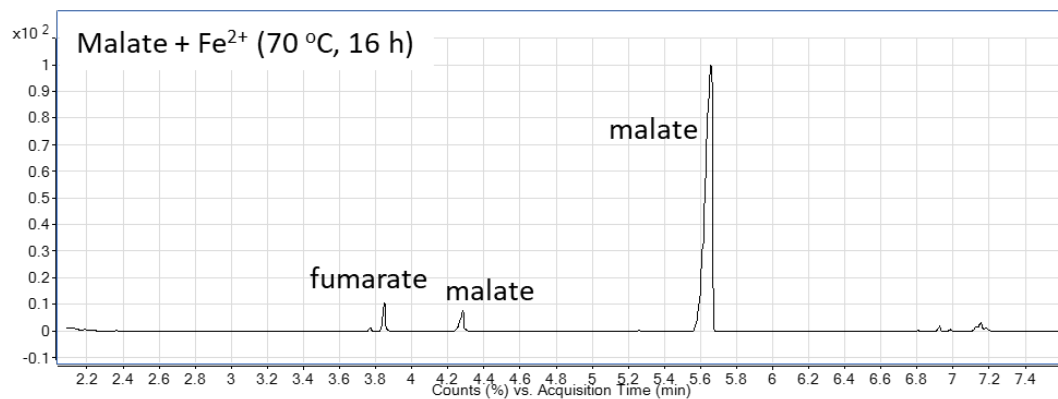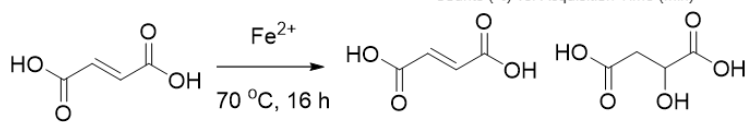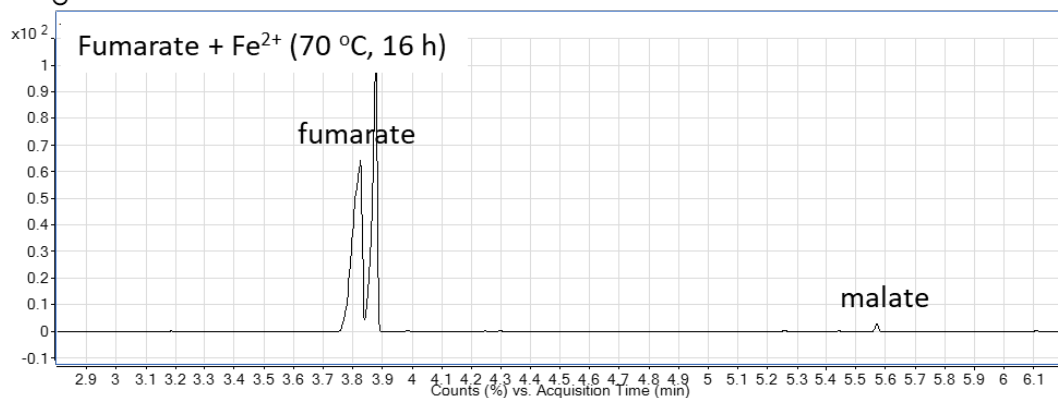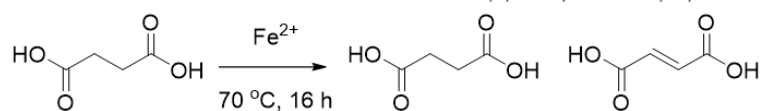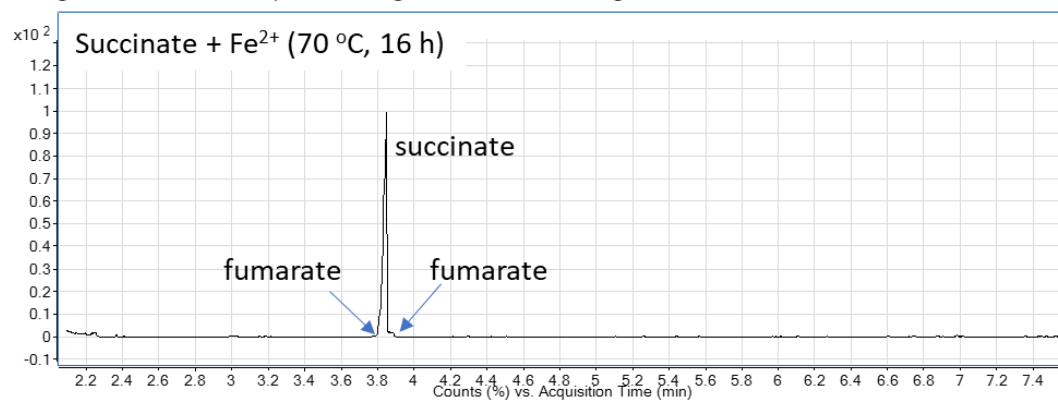





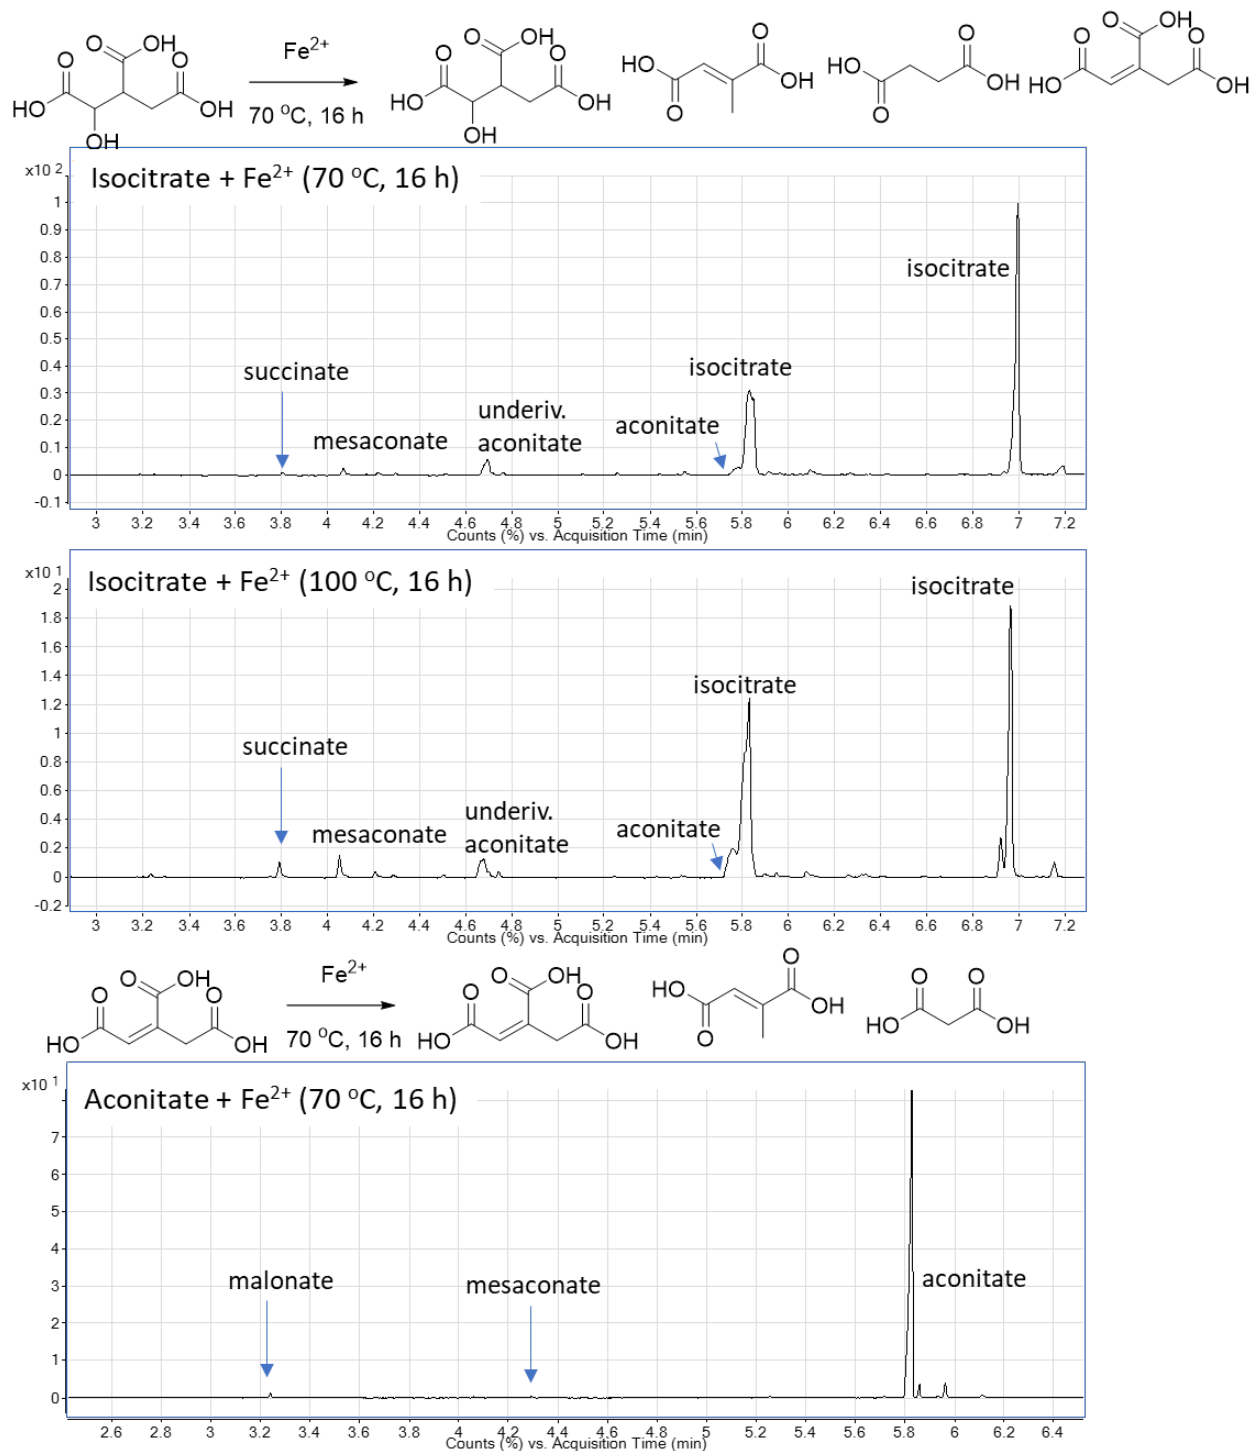

**Figure S13.**

Reaction scheme and GC chromatograms of control reactions (intermediate + Fe<sup>2+</sup>), after derivatization of the reaction mixture with ECF/EtOH.

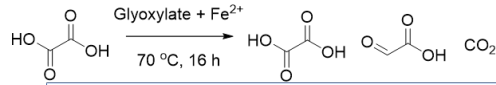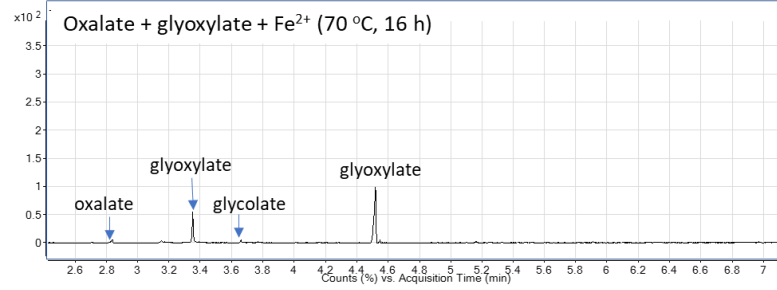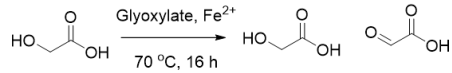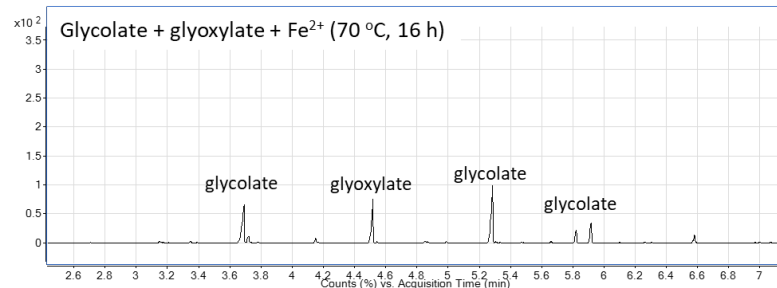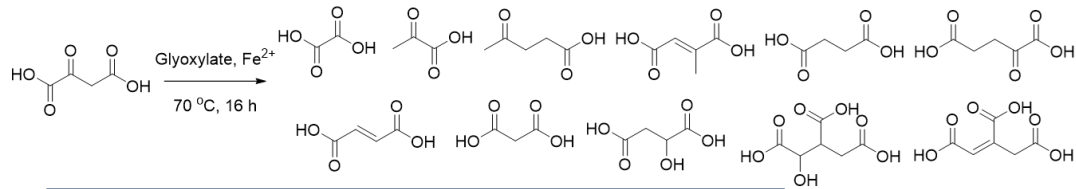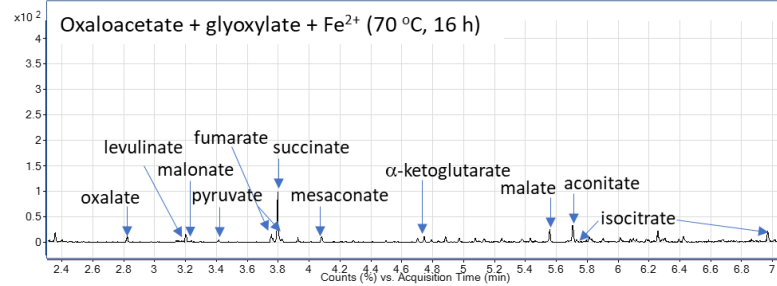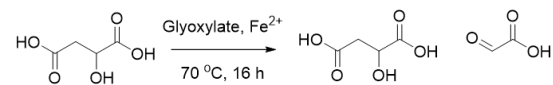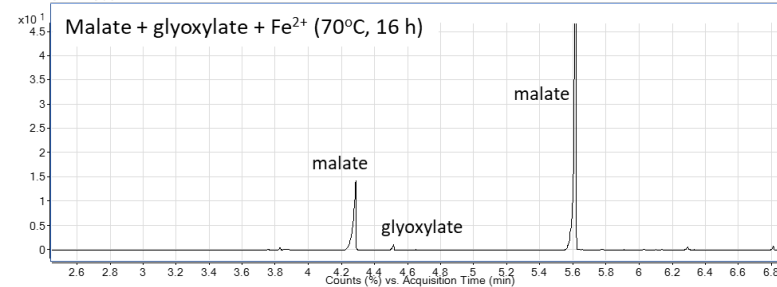

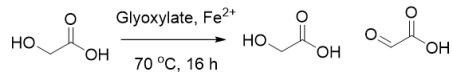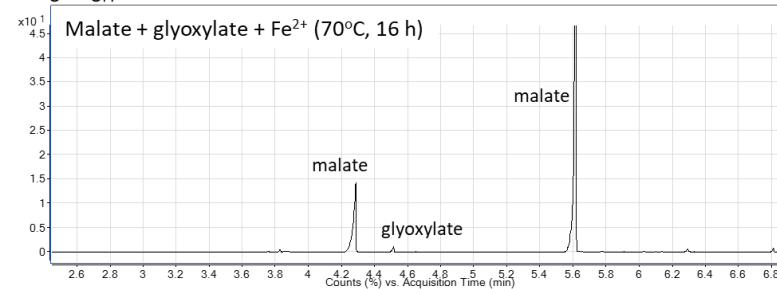



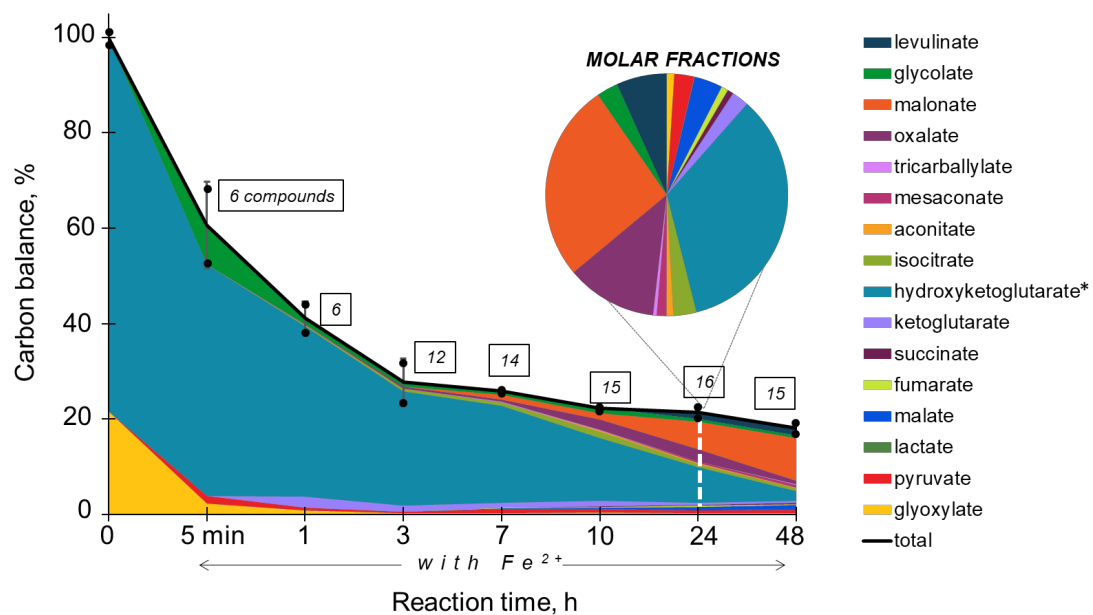

**Figure S15.**

Evolution over time of a reaction network arising from pyruvate-2-<sup>13</sup>C and glyoxylate, promoted by Fe<sup>2+</sup> at 70 °C. Carbon balance refers to the % of carbon atoms observed in solution relative to 0 h and is reported as the average of two independent runs. Product distribution at 24 h is shown in a pie chart. Error bars correspond to the standard deviation. \*Values for hydroxyketoglutarate also include oxopentanedioate.

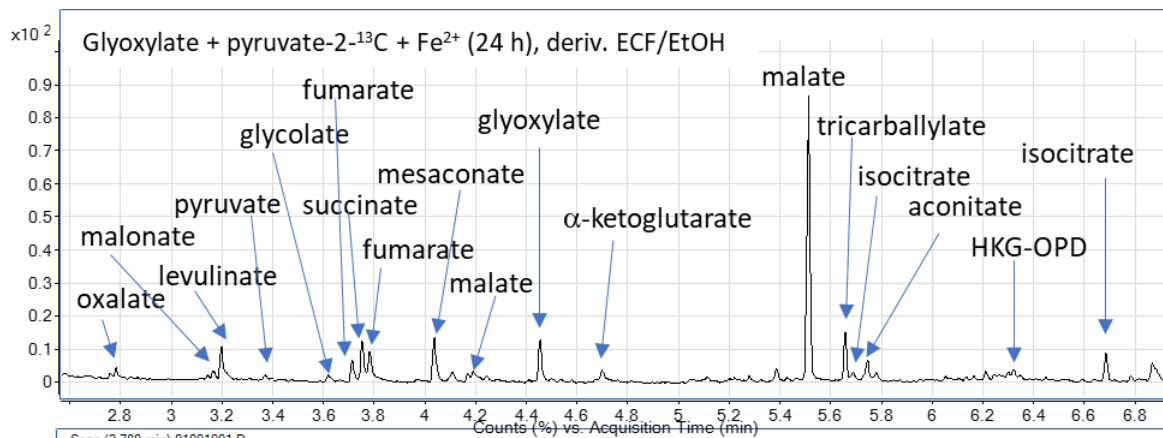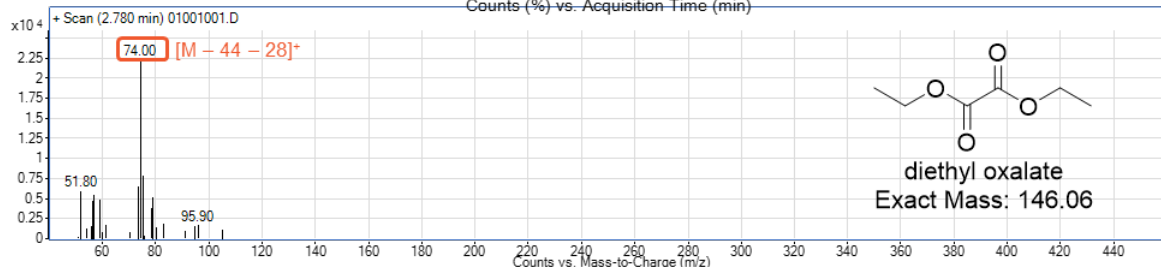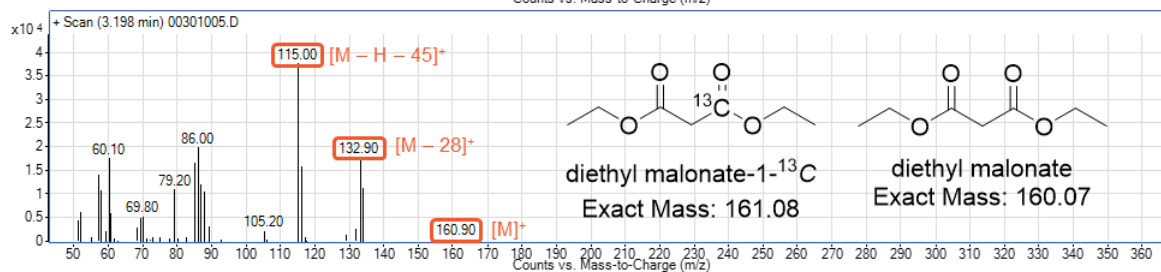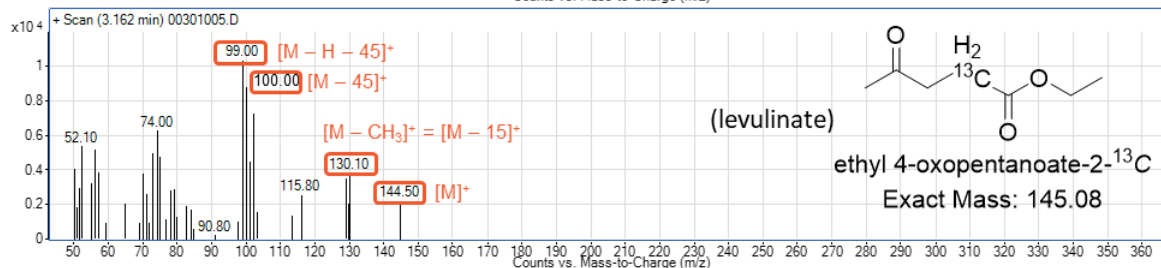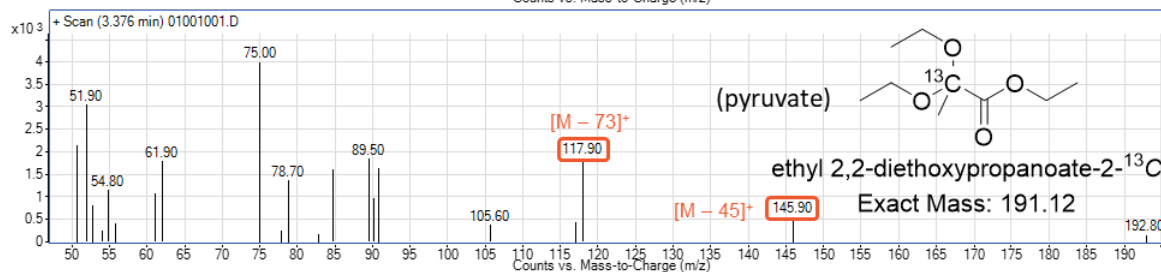

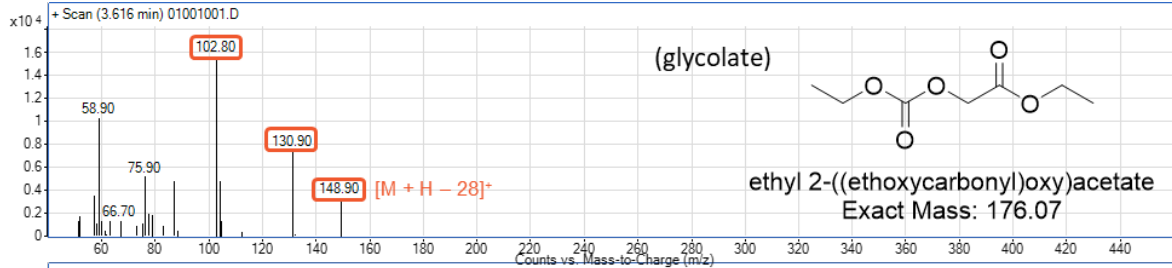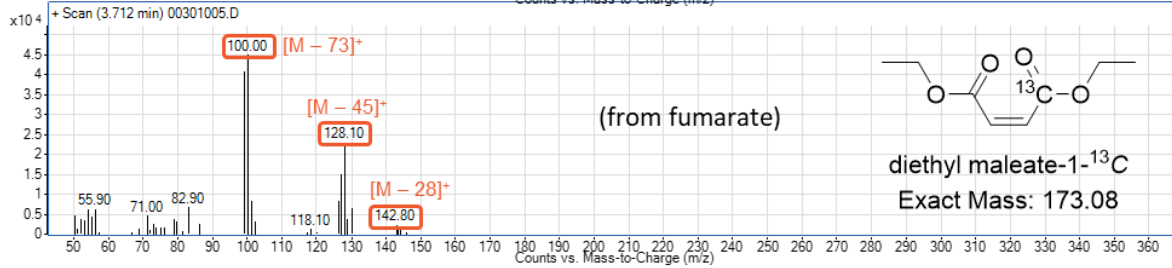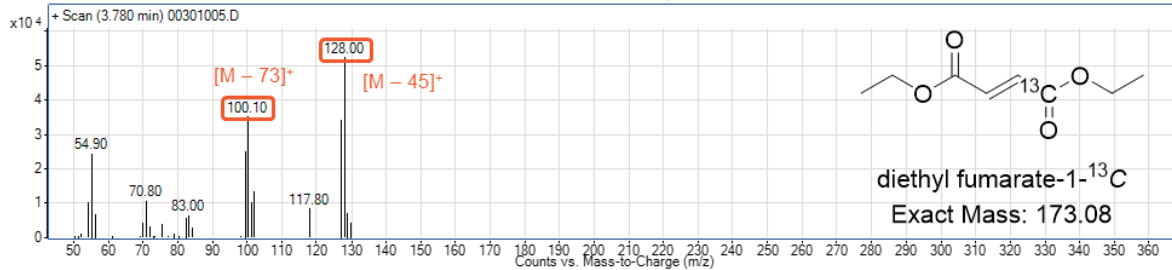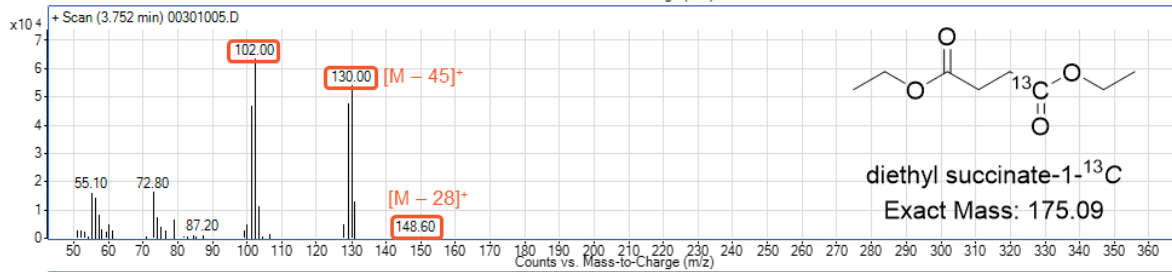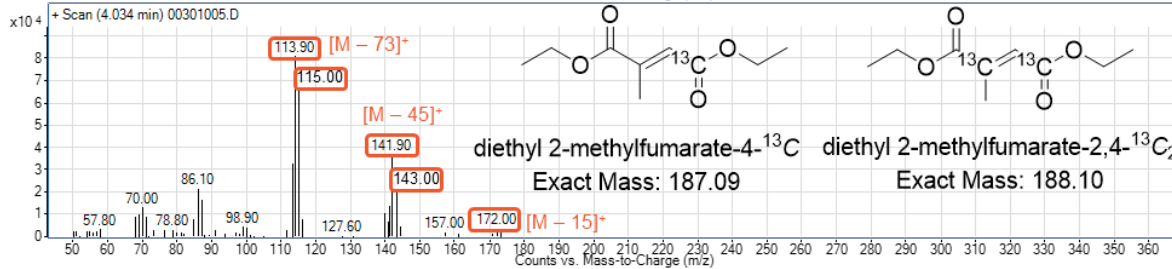

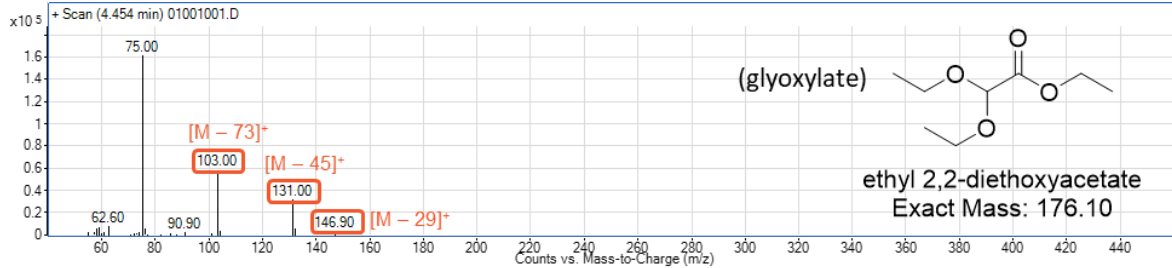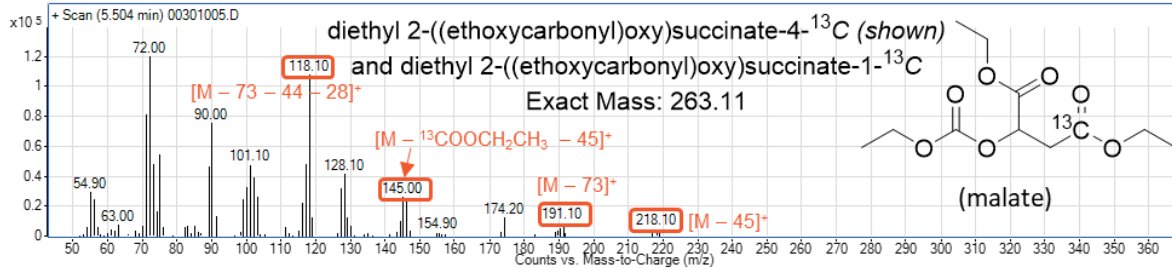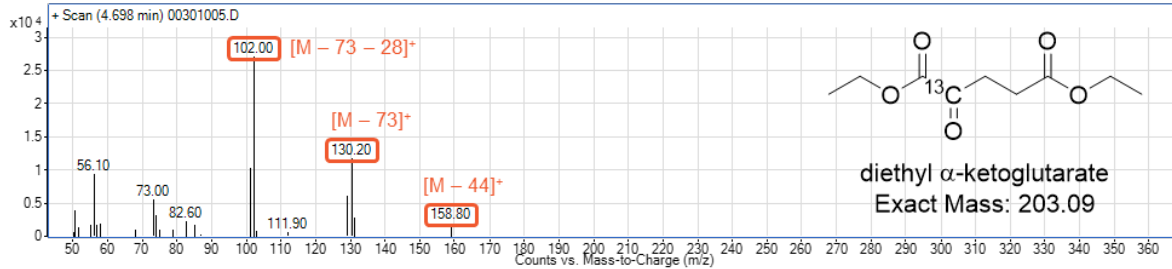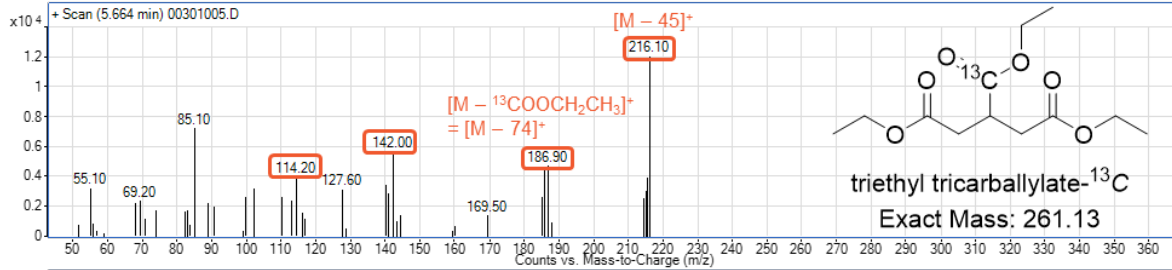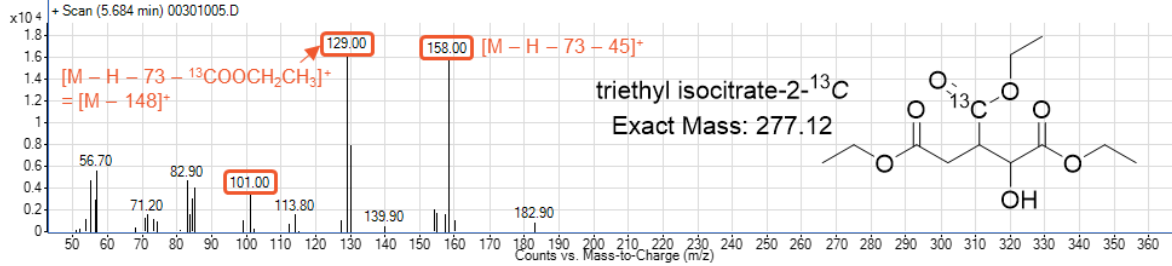



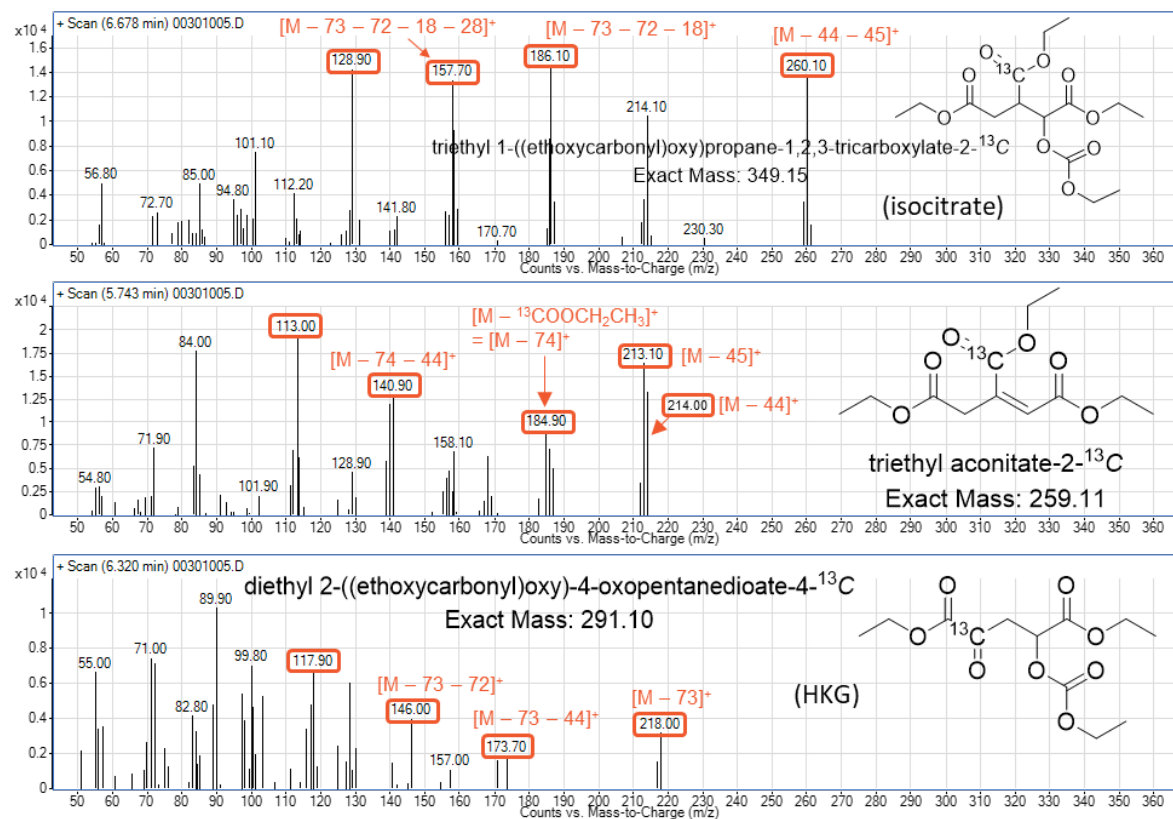

**Figure S16.**

GC chromatogram and mass spectra of ECF/EtOH-derivatized compounds detected at  $t = 24$  h in the reaction network arising from pyruvate-2-<sup>13</sup>C and glyoxylate, promoted by Fe<sup>2+</sup> at 70 °C. Characteristic (“fingerprint”) peaks are highlighted in red.

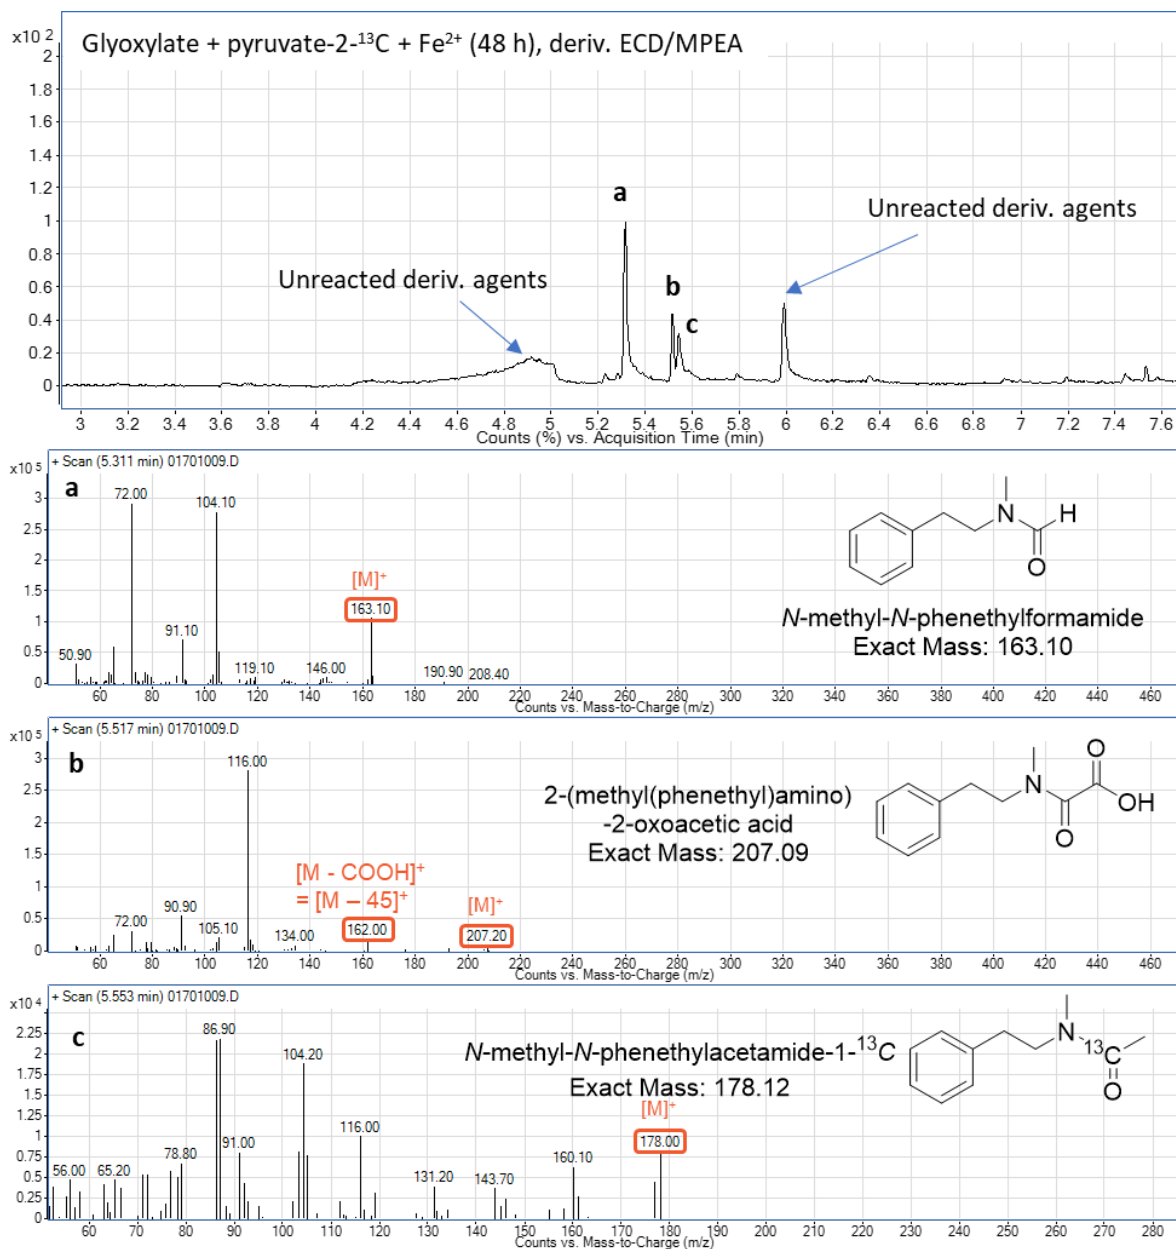

**Figure S17.**

GC chromatogram and mass spectra confirming the presence of formate, oxalate and acetate, detected as their *N*-methyl-*N*-phenethylamides, after derivatization of a typical <sup>13</sup>C-labeled reaction mixture (pyruvate-1-<sup>13</sup>C + glyoxylate) with ECD/MPEA after 48 h reaction time.

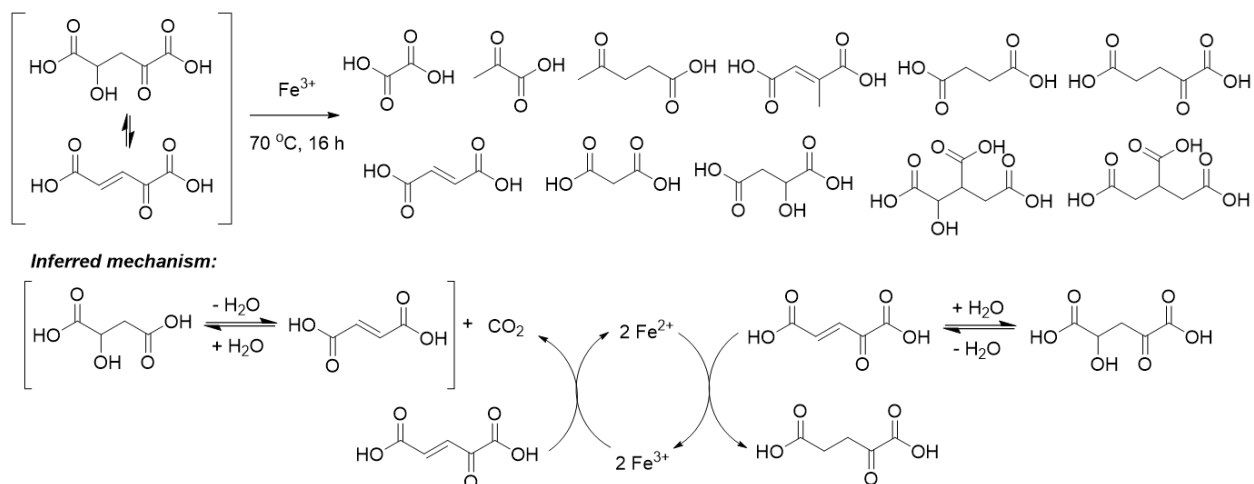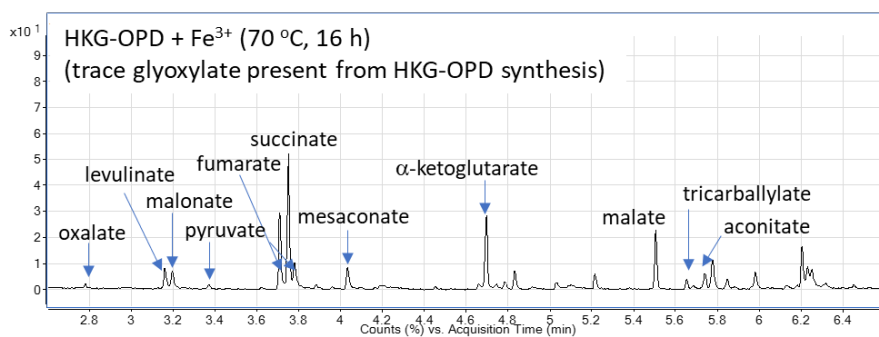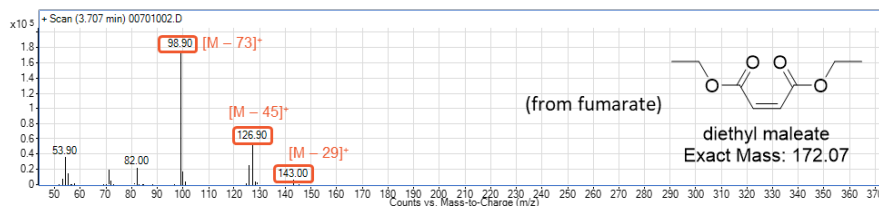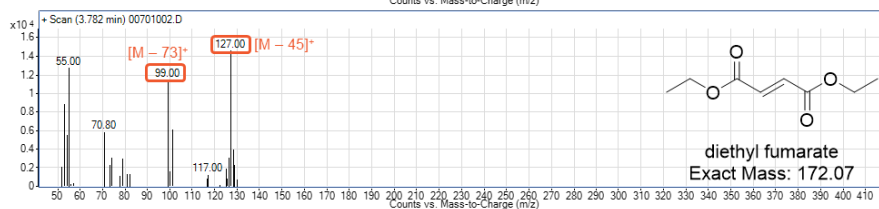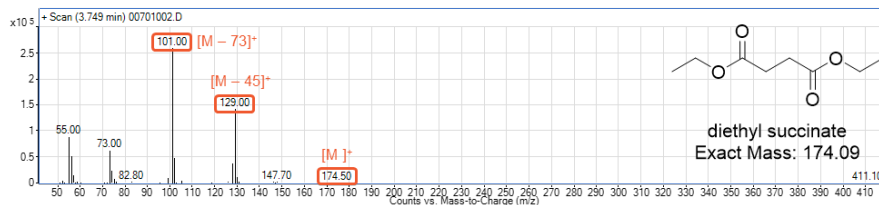

**Figure S18.**

Reaction scheme and GC chromatograms of a control reaction (HKG/OPD +  $\text{Fe}^{3+}$ ), after derivatization of the reaction mixture with ECF/EtOH.

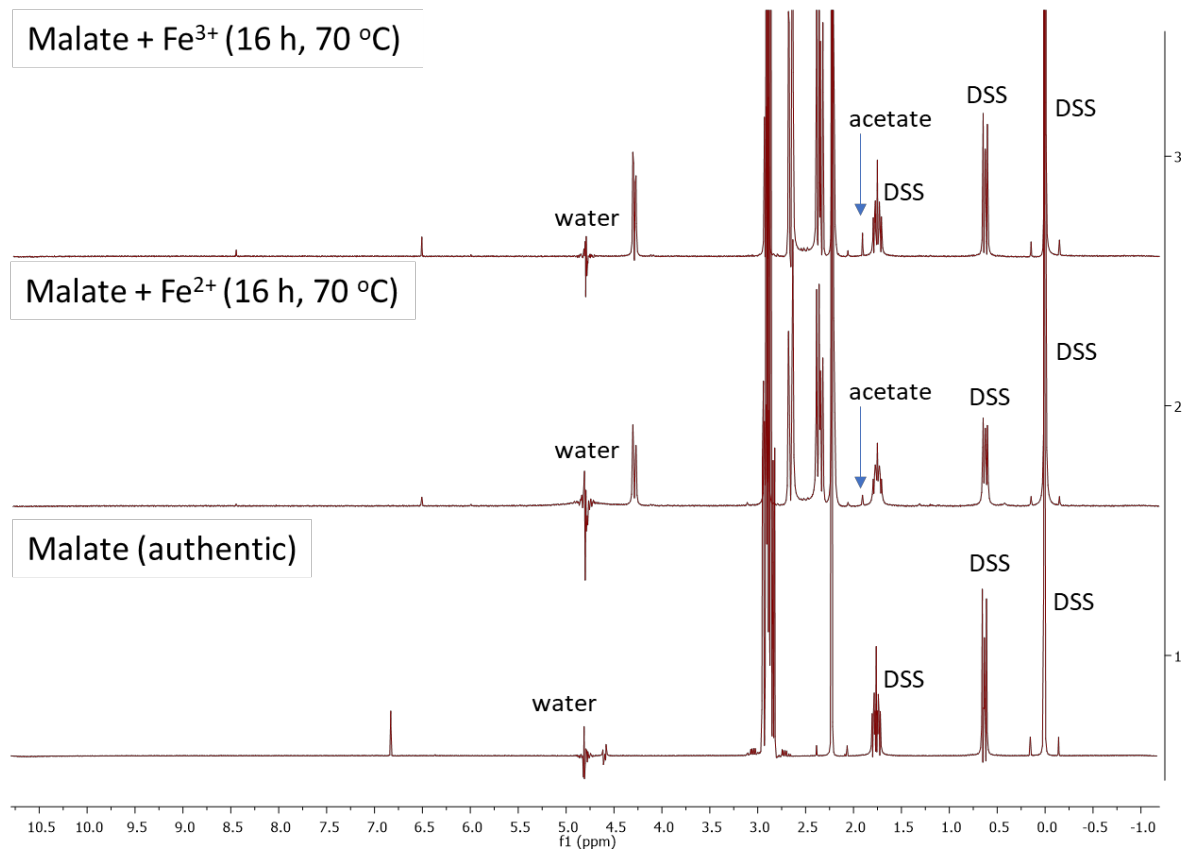

**Figure S19**

$^1\text{H}$  NMR of control reactions (malate +  $\text{Fe}^{2+}$  or  $\text{Fe}^{3+}$ , 70 °C for 16 h), highlighting the presence of acetate (oxidation of malate to oxaloacetate, then  $\text{Fe}^{2+}$  (or  $\text{Fe}^{3+}$ )-promoted decarboxylation to pyruvate and subsequently to acetate). DSS was used as standard.

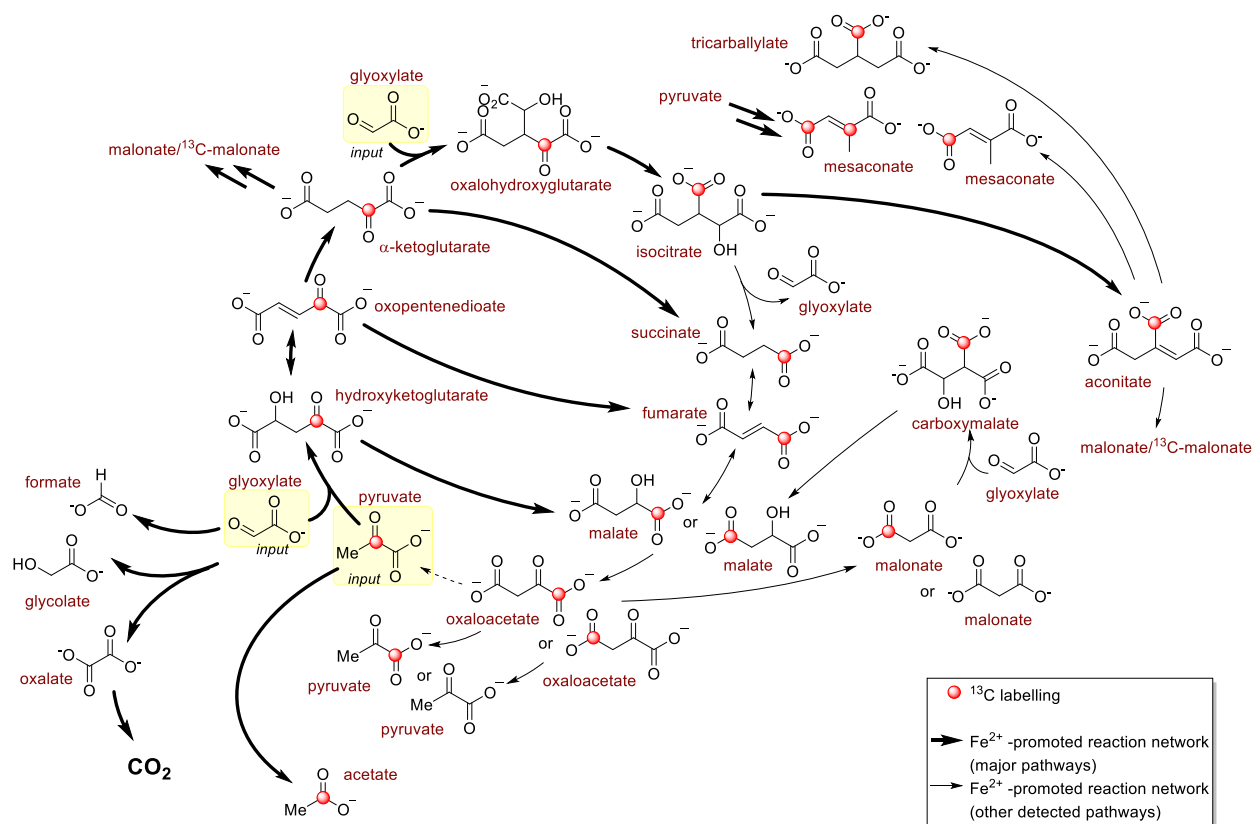

**Figure S20**

Propagation of the  $^{13}\text{C}$  label in the Fe $^{2+}$ -promoted reaction network arising from glyoxylate and pyruvate-2- $^{13}\text{C}$  at 70 °C.

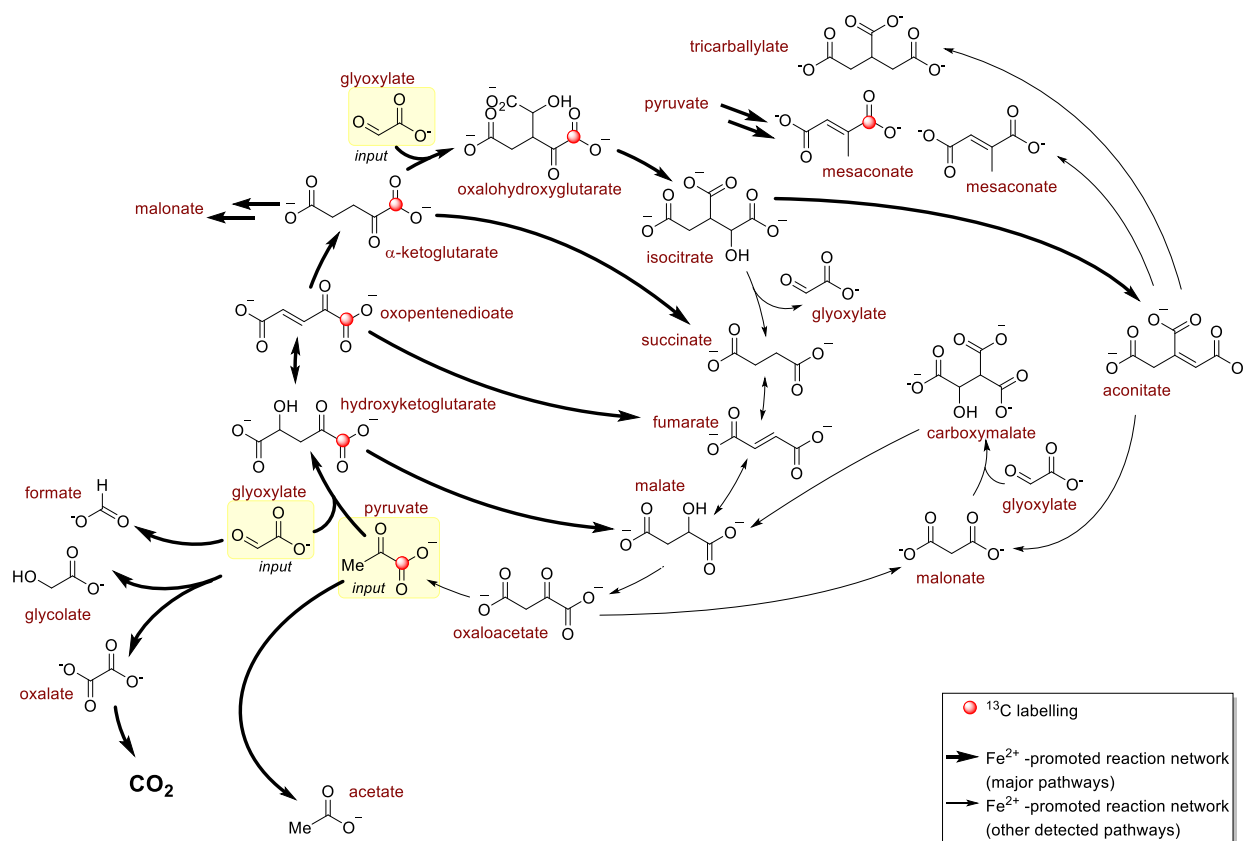

**Figure S21**

Propagation of the  $^{13}\text{C}$  label in the  $\text{Fe}^{2+}$ -promoted reaction network arising from glyoxylate and pyruvate-1- $^{13}\text{C}$  at 70 °C.

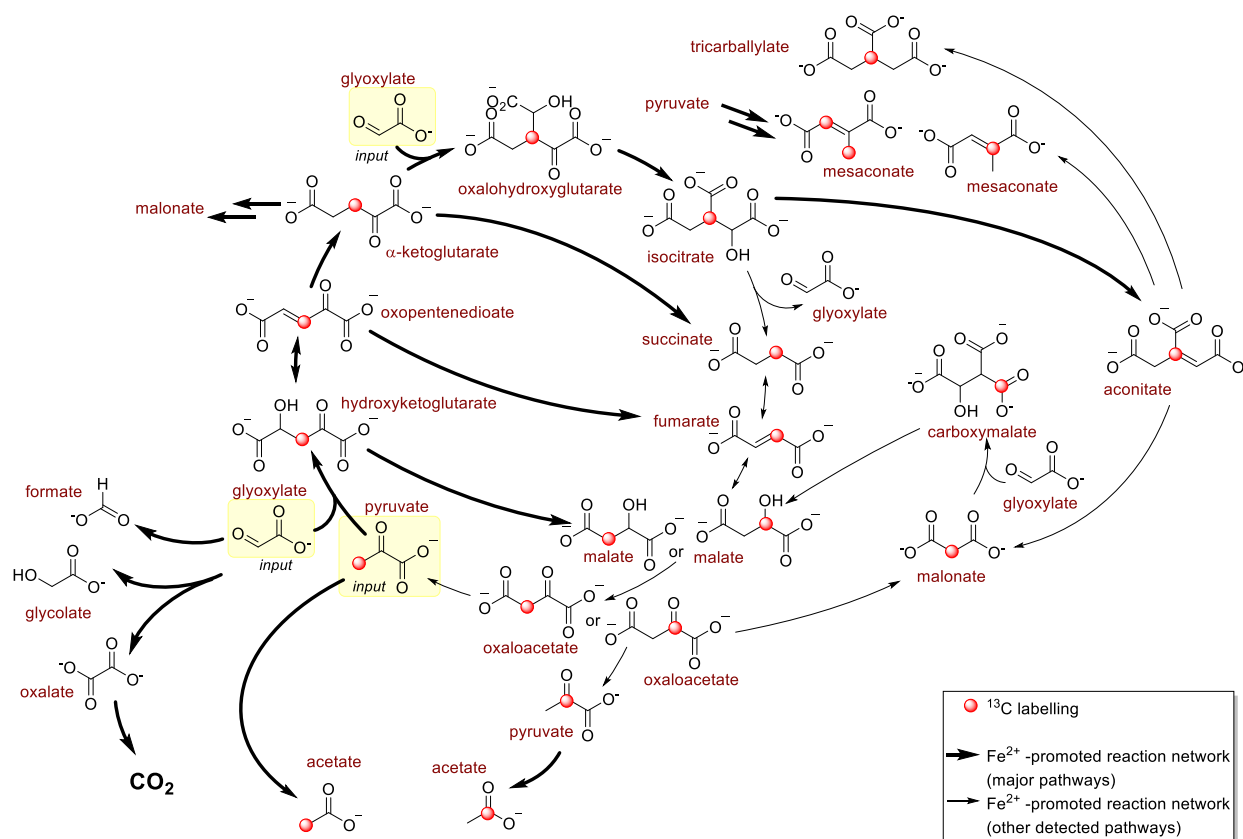

**Figure S22**

Propagation of the  $^{13}\text{C}$  label in the  $\text{Fe}^{2+}$ -promoted reaction network arising from glyoxylate and pyruvate-3- $^{13}\text{C}$  at 70 °C.

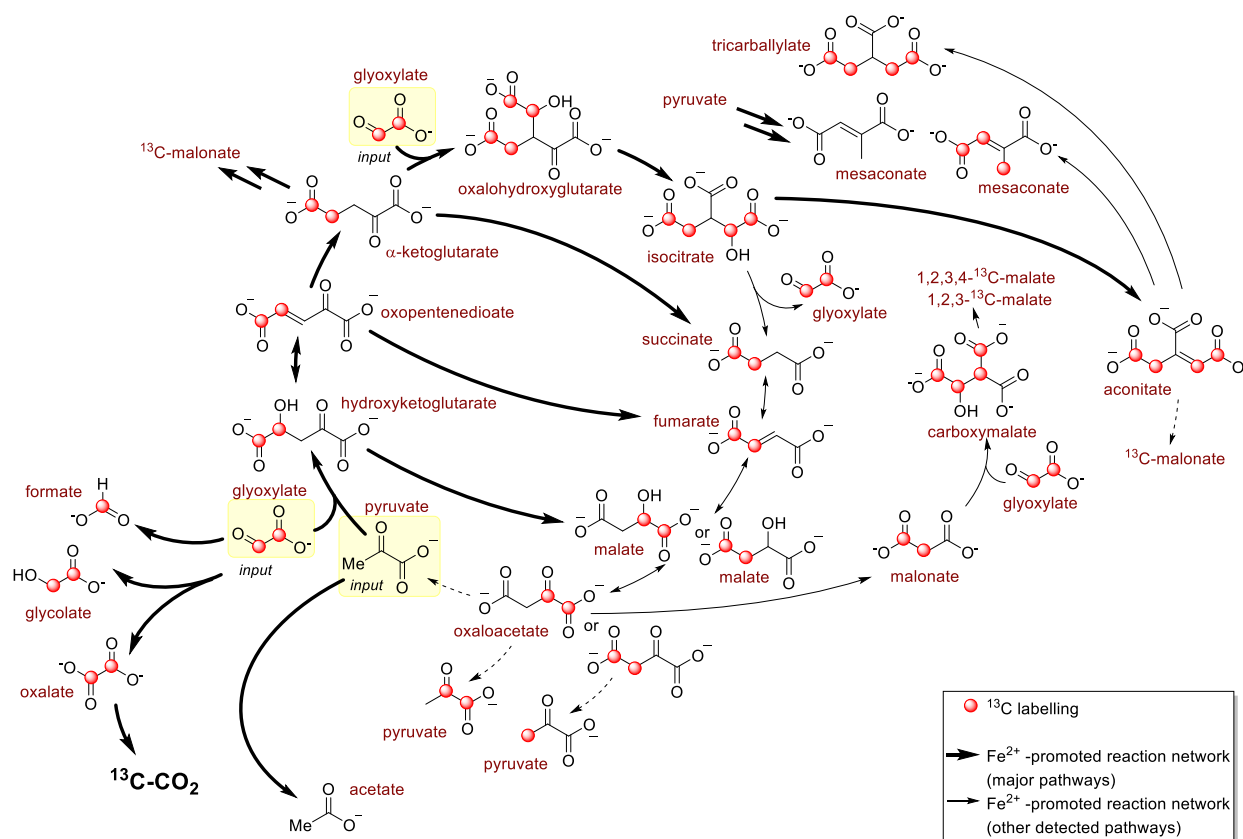

**Figure S23**

Propagation of the  $^{13}\text{C}$  label in the Fe<sup>2+</sup>-promoted reaction network arising from glyoxylate and glyoxylate-1,2- $^{13}\text{C}_2$  at 70 °C.



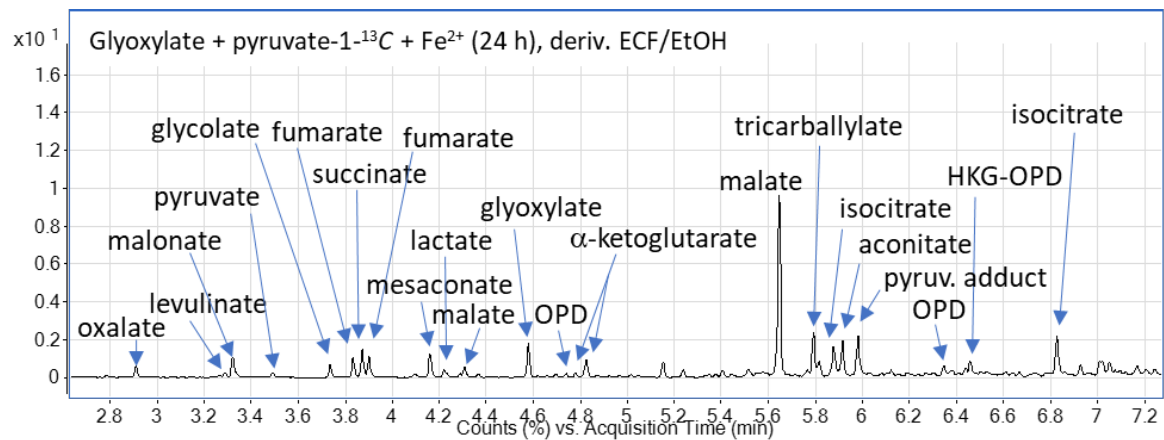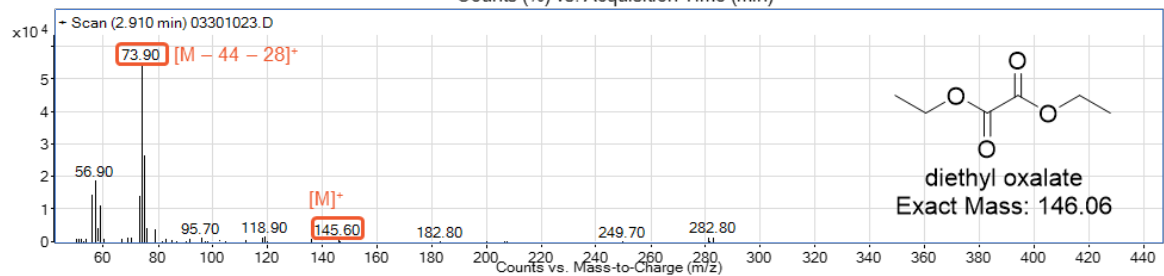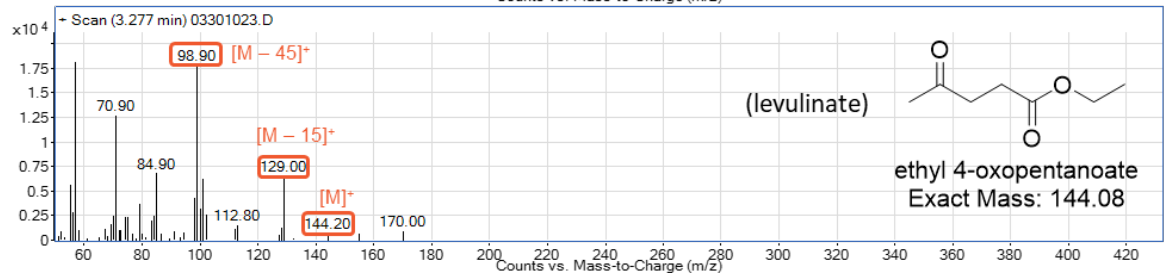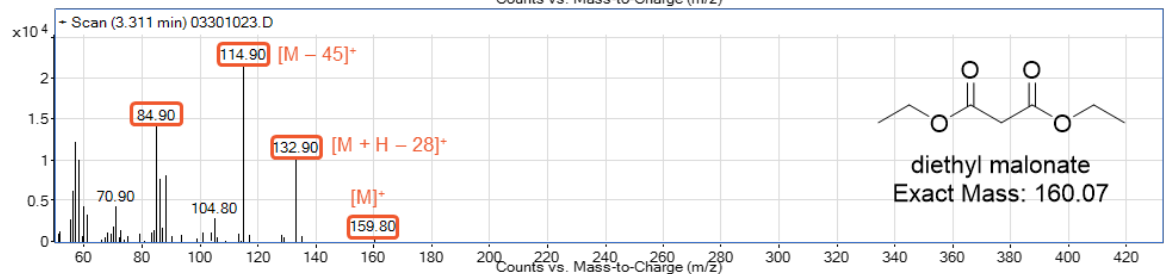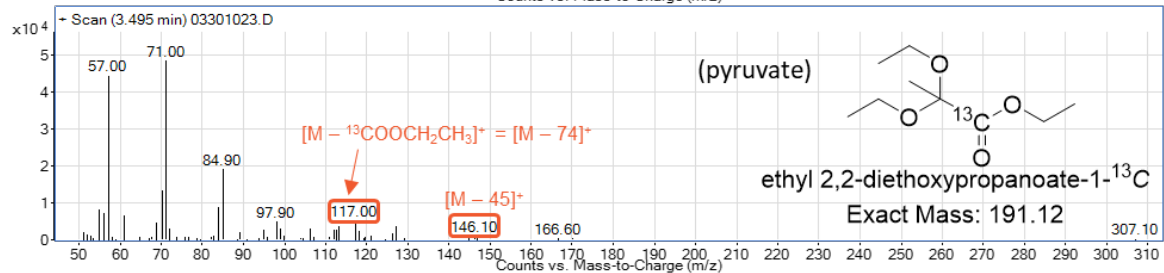

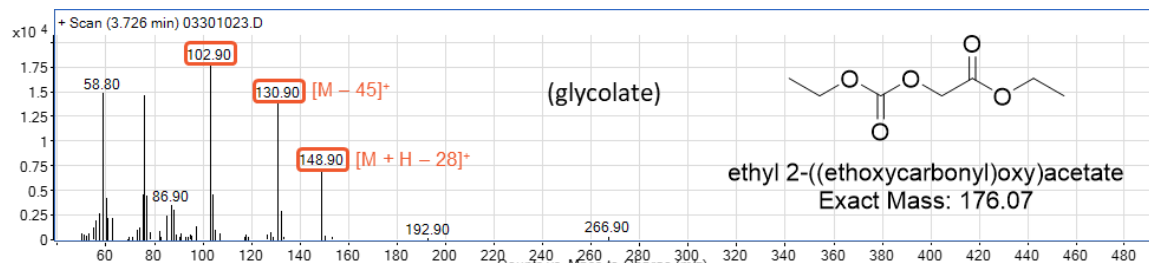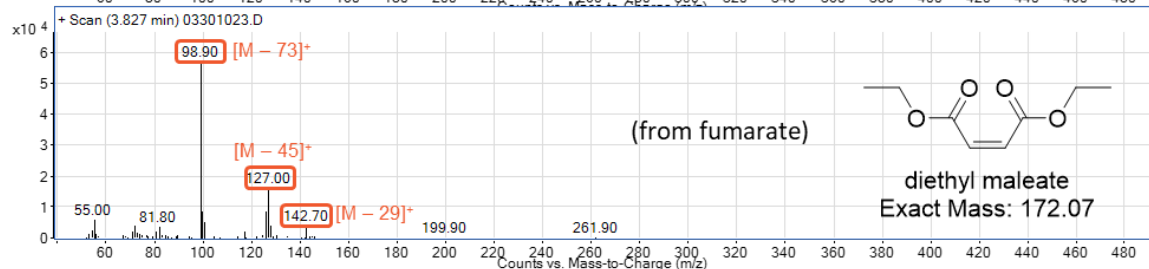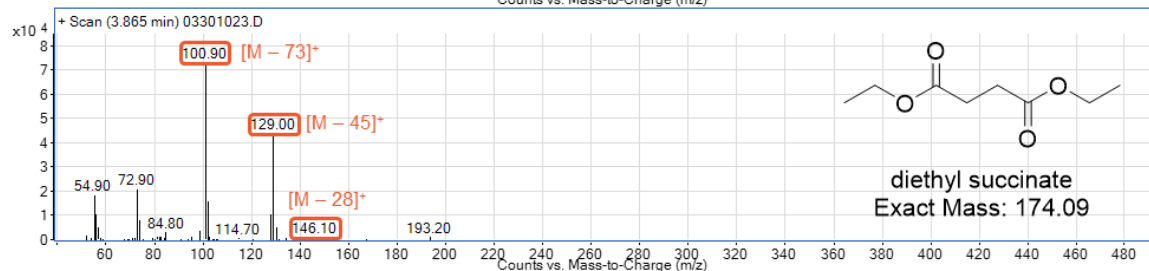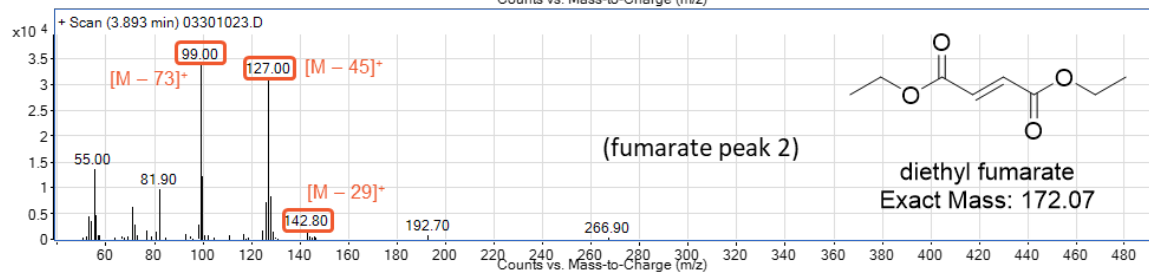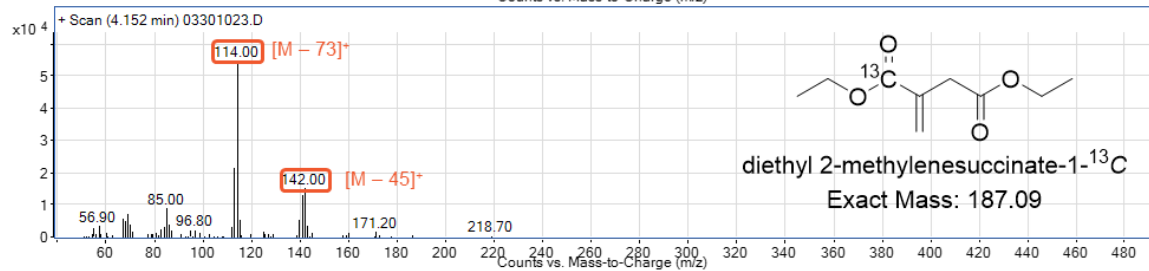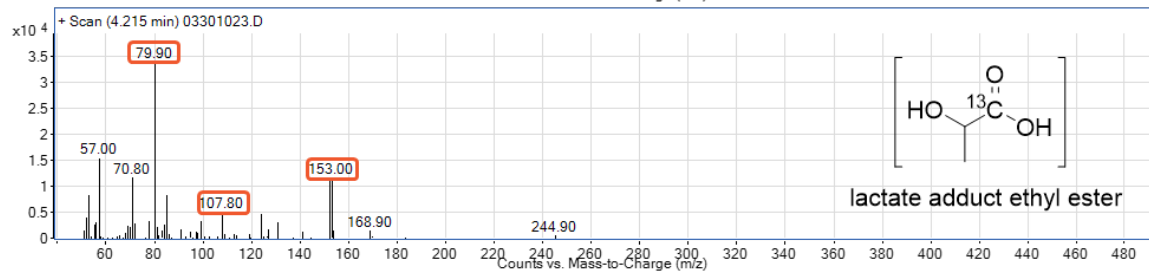

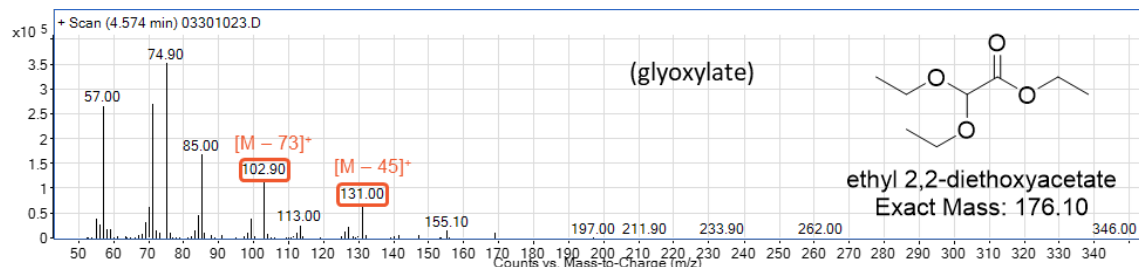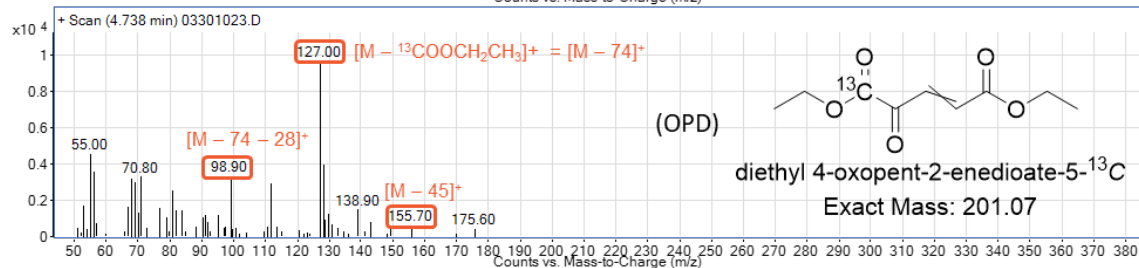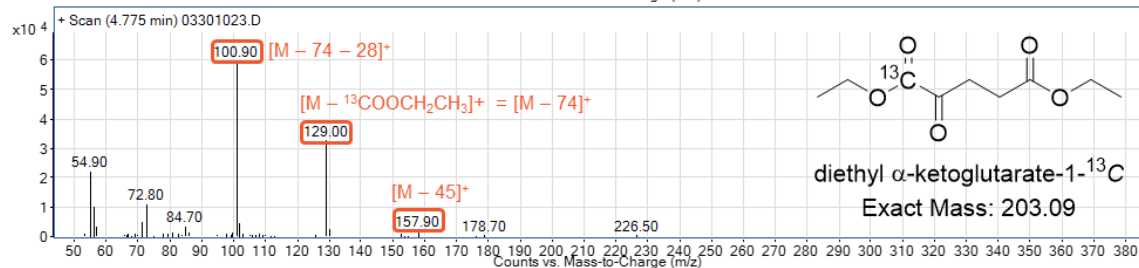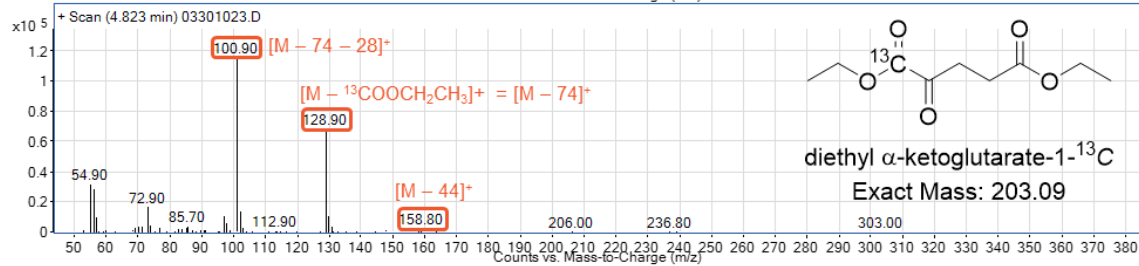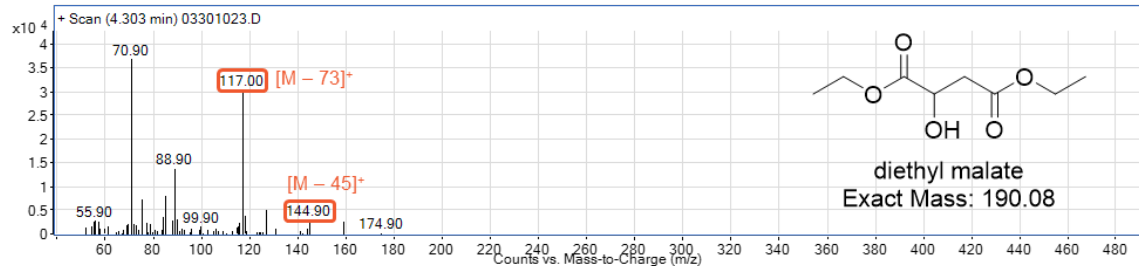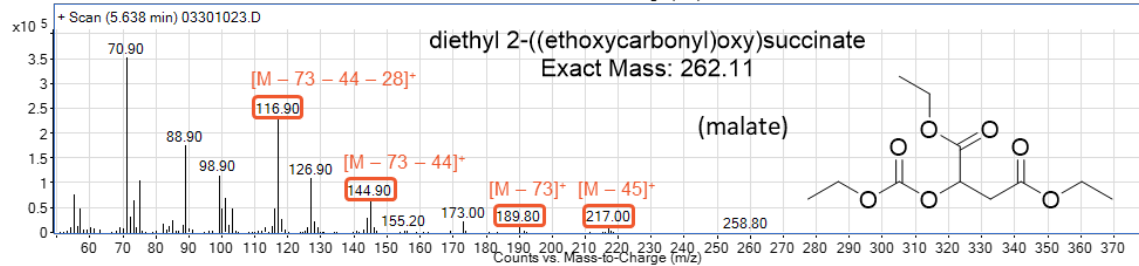

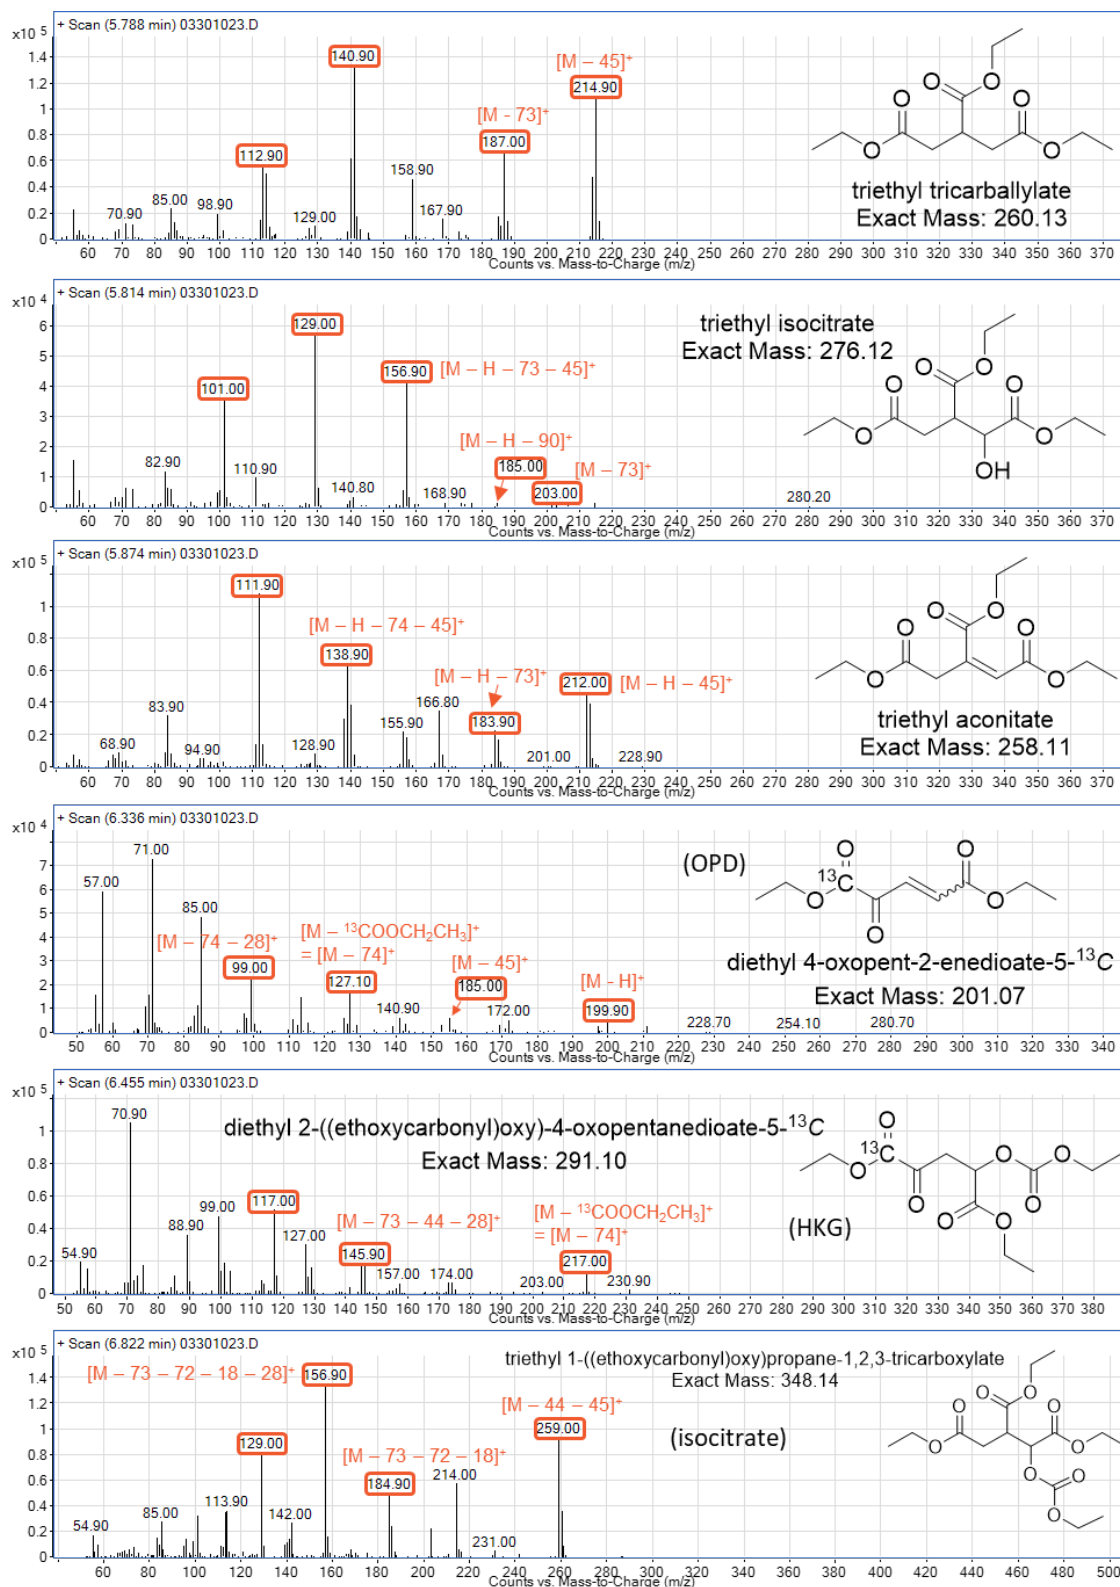

**Figure S24.**

GC chromatogram and mass spectra of ECF/EtOH-derivatized compounds detected at t = 24 h in the reaction network arising from pyruvate-1-<sup>13</sup>C and glyoxylate, promoted by Fe<sup>2+</sup> at 70 °C. Characteristic (“fingerprint”) peaks are highlighted in red.

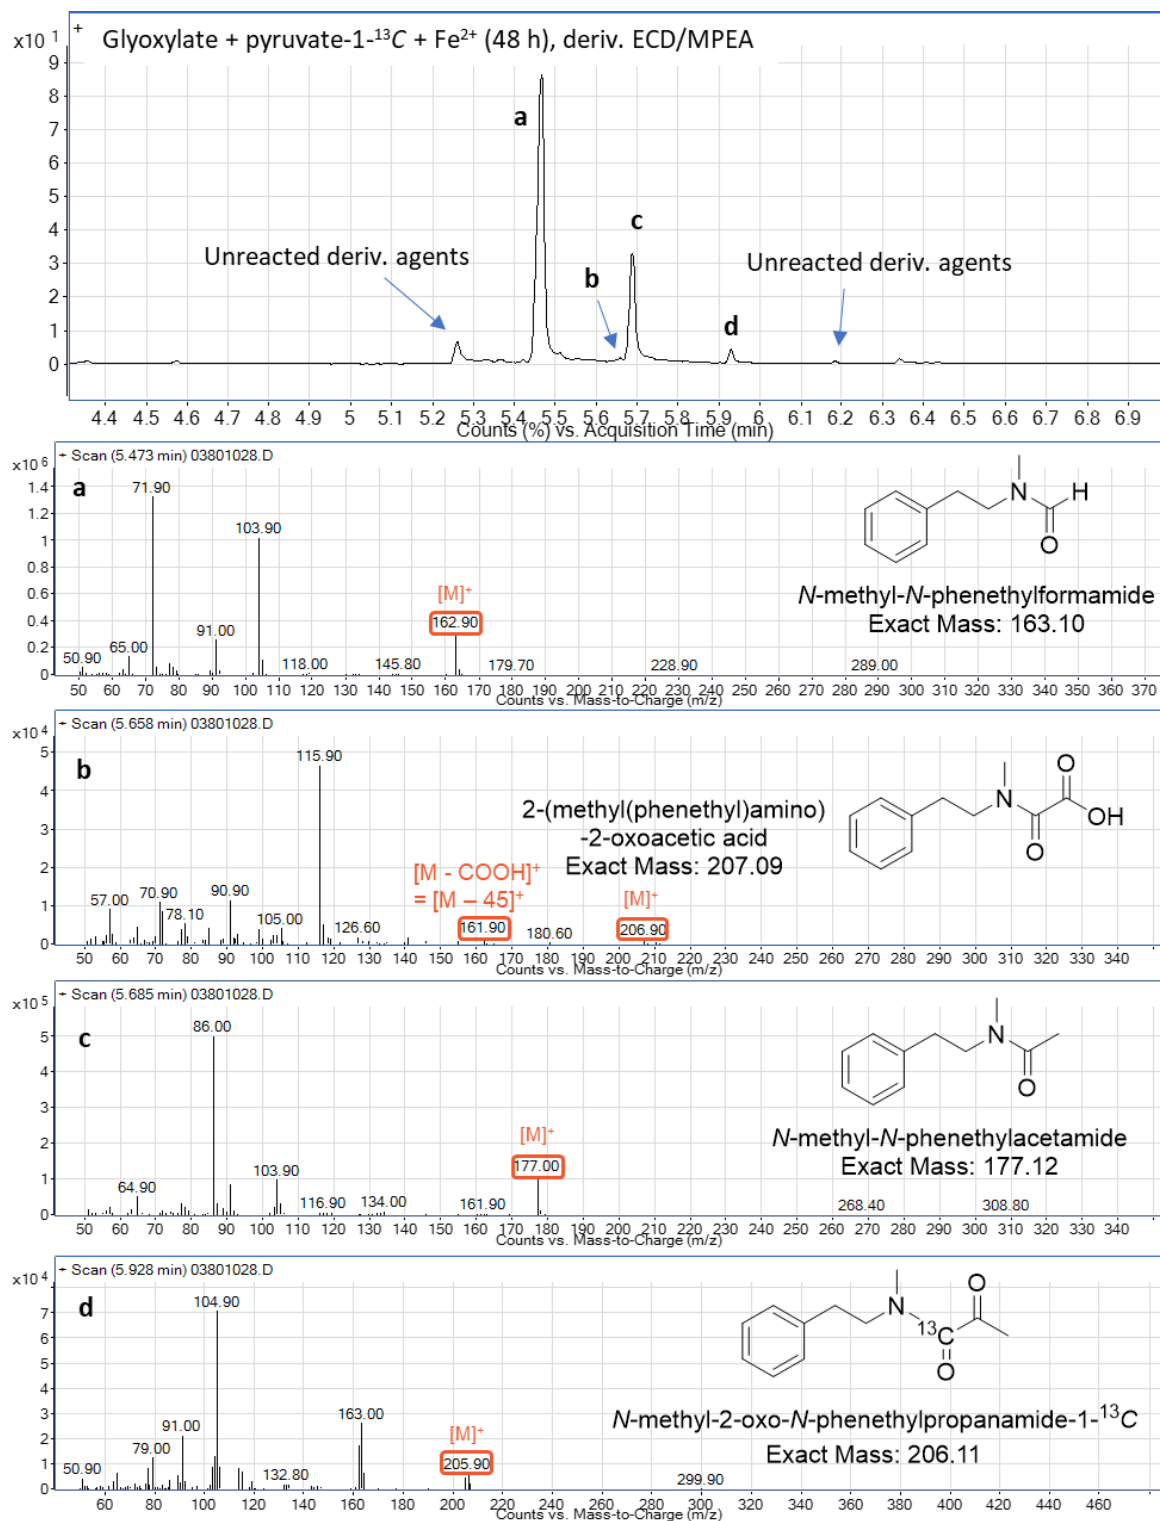

**Figure S25.**

GC chromatogram and mass spectra confirming the presence of formate, oxalate and acetate, detected as their *N*-methyl-*N*-phenethylamides, after derivatization of a typical reaction mixture (pyruvate-1-<sup>13</sup>C + glyoxylate) with ECD/MPEA after 48 h reaction time.

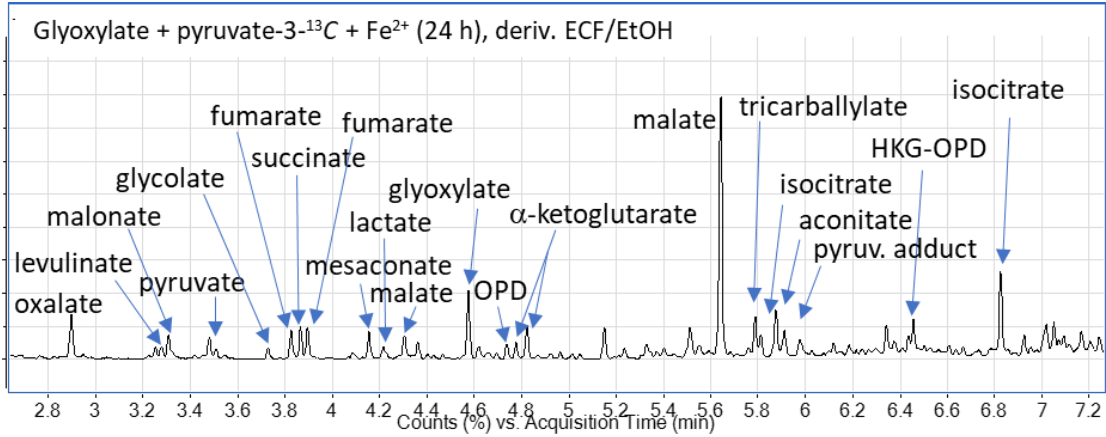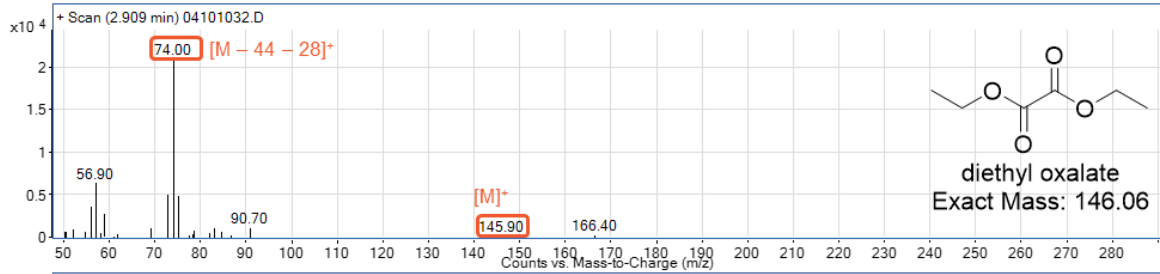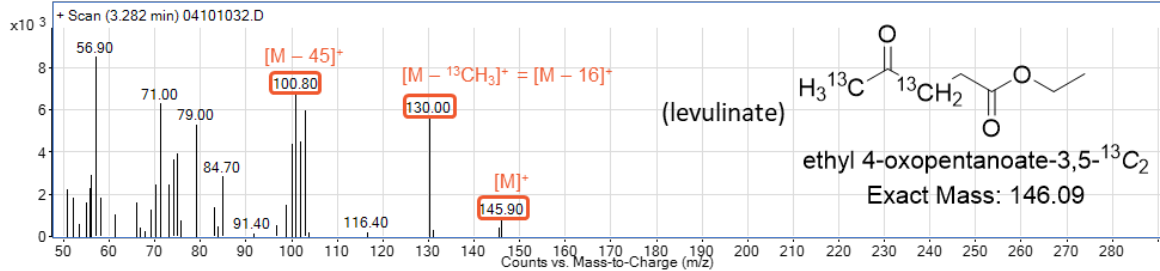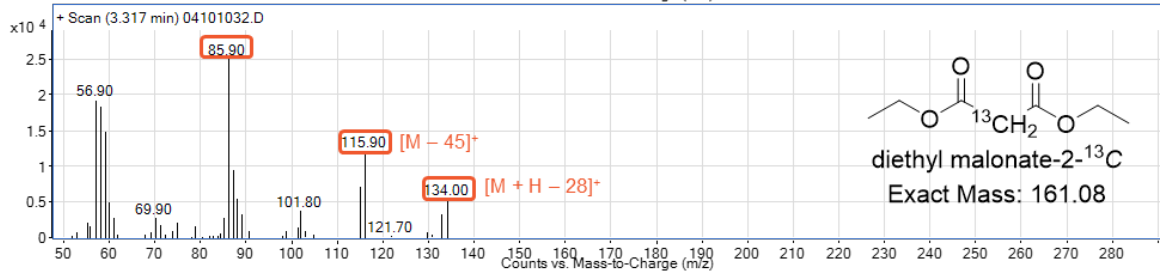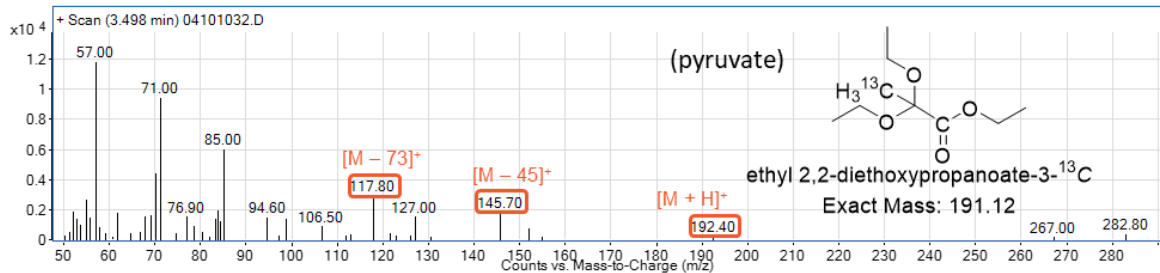

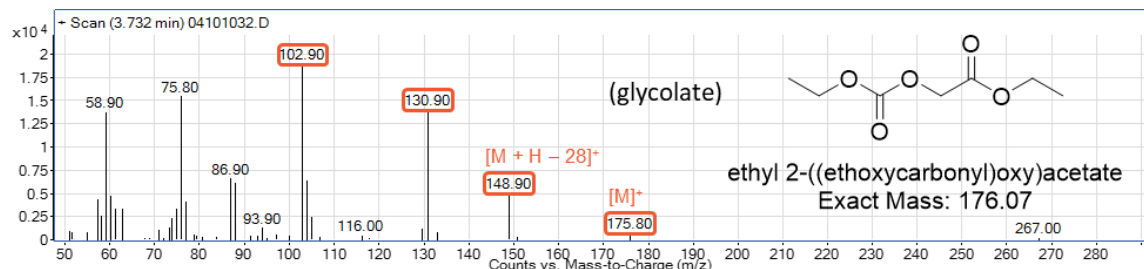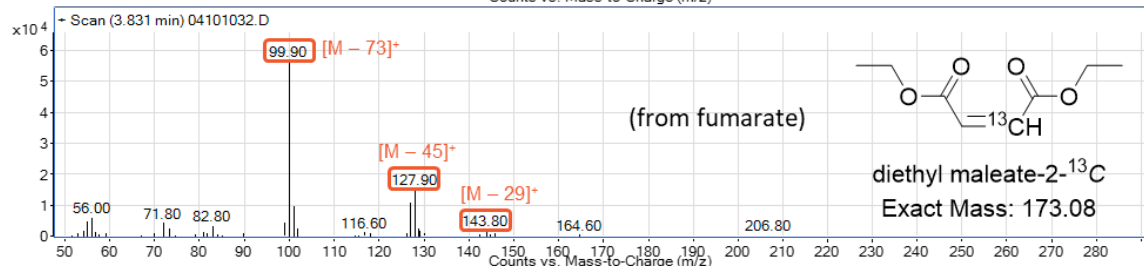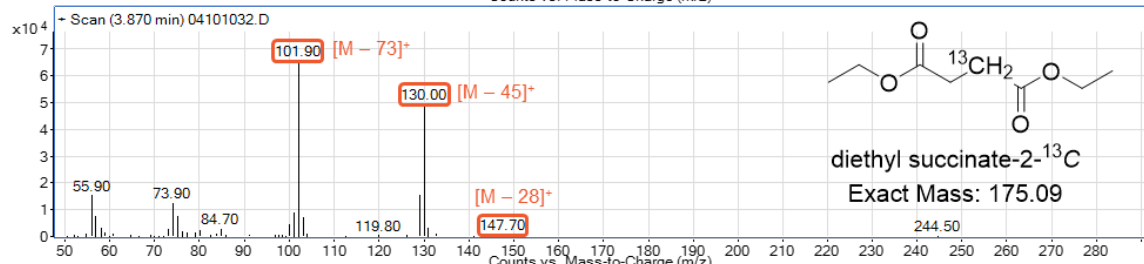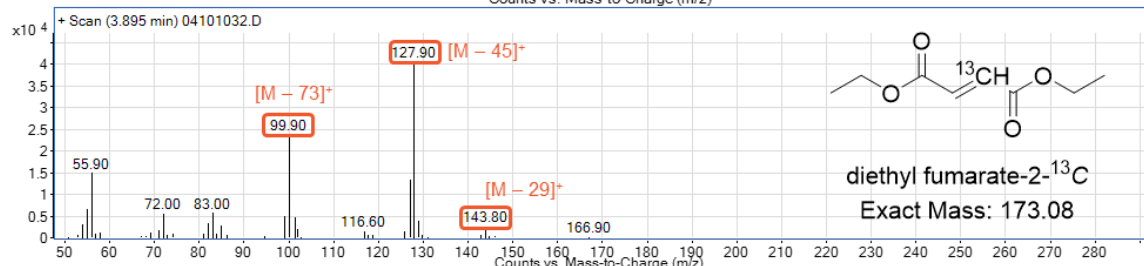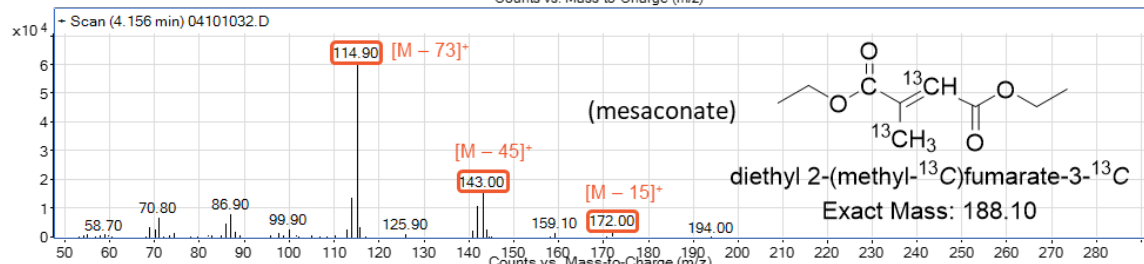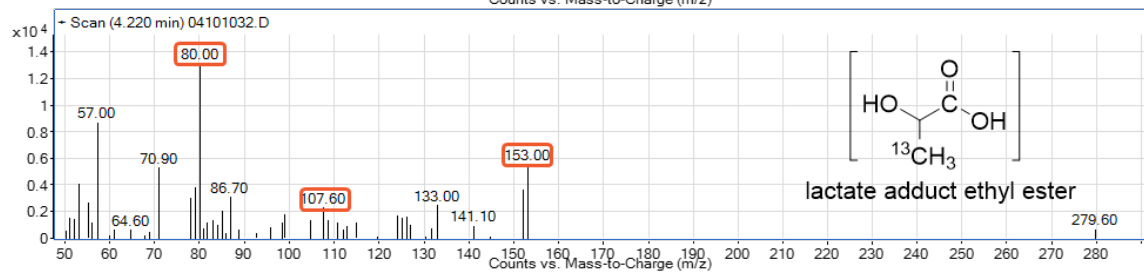

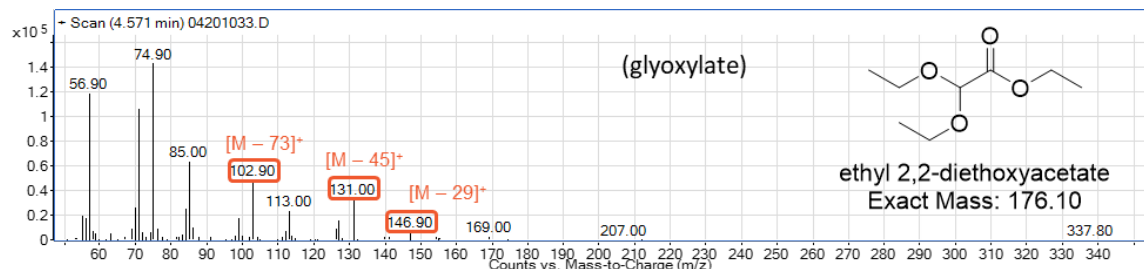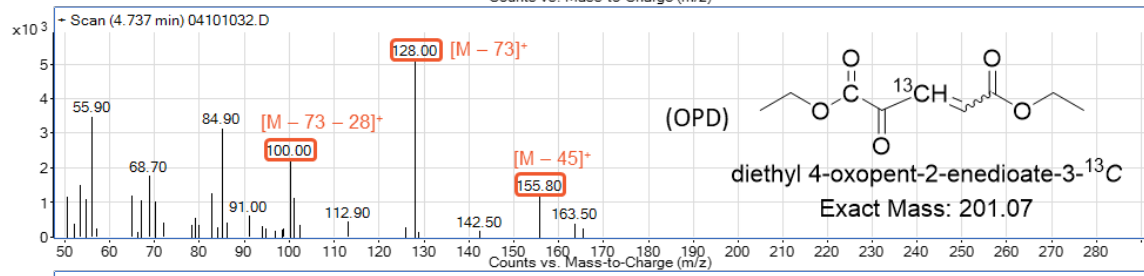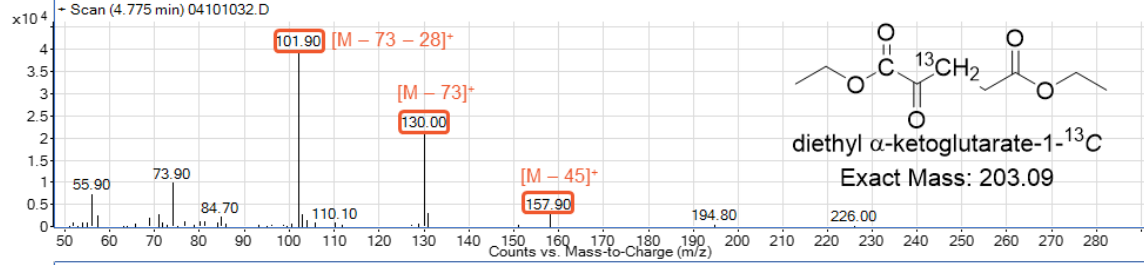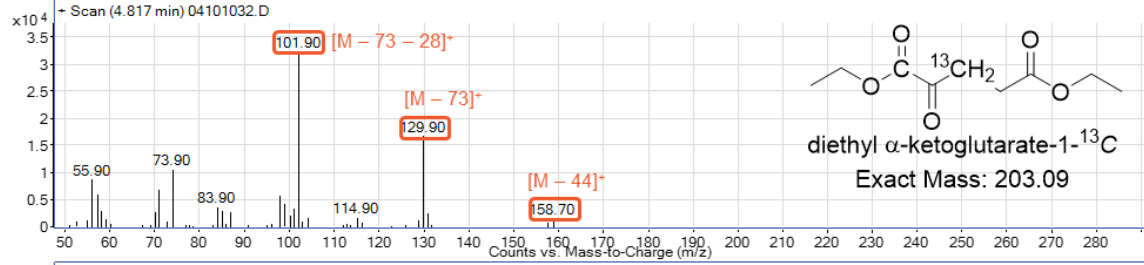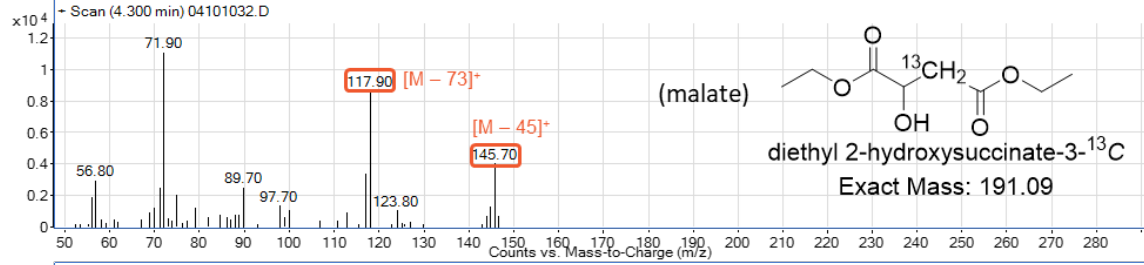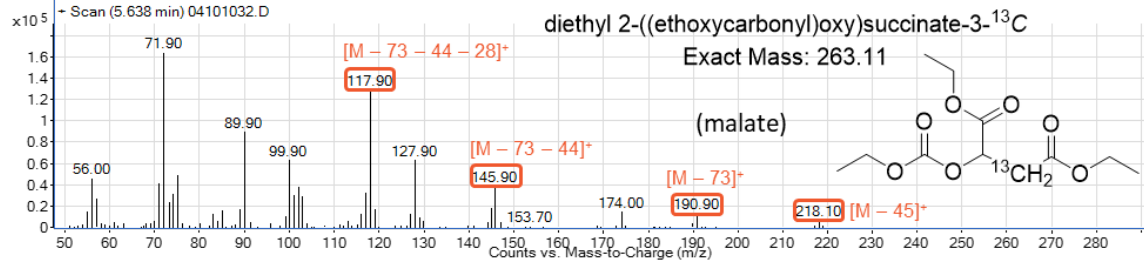



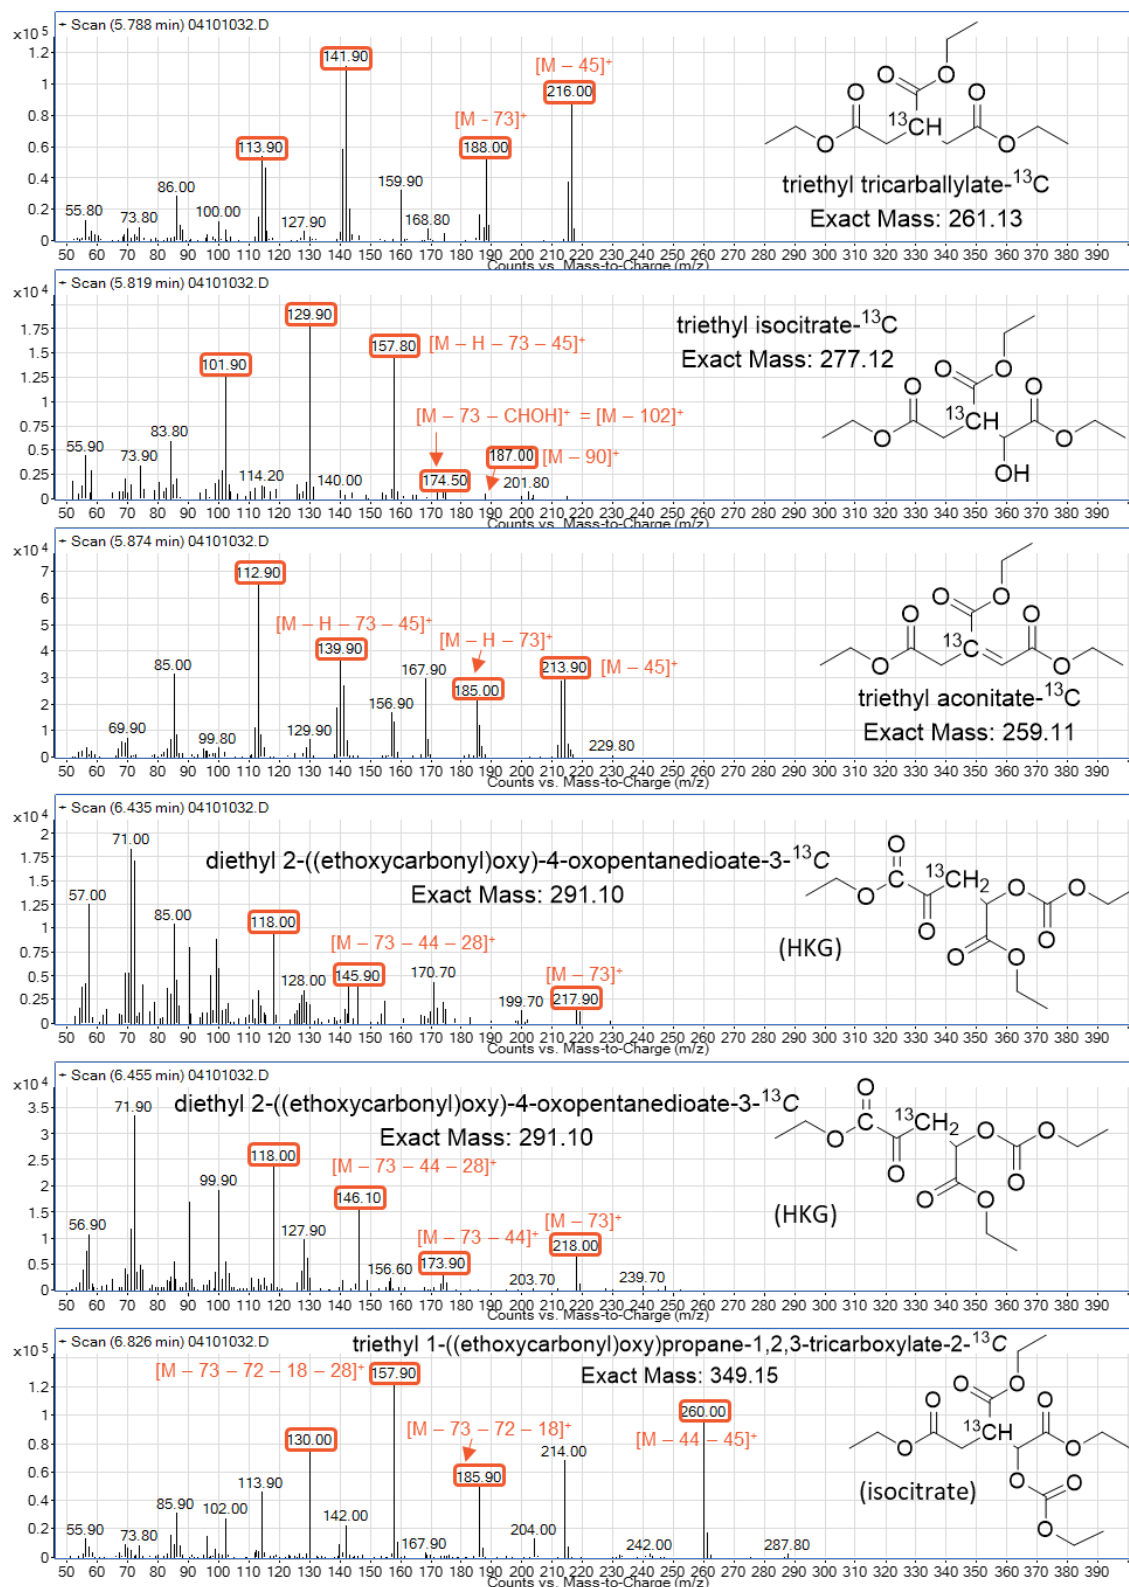

**Figure S26.**

GC chromatogram and mass spectra of ECF/EtOH-derivatized compounds detected at  $t = 24$  h in the reaction network arising from pyruvate-3- $^{13}\text{C}$  and glyoxylate, promoted by  $\text{Fe}^{2+}$  at  $70^\circ\text{C}$ . Characteristic ("fingerprint") peaks are highlighted in red.

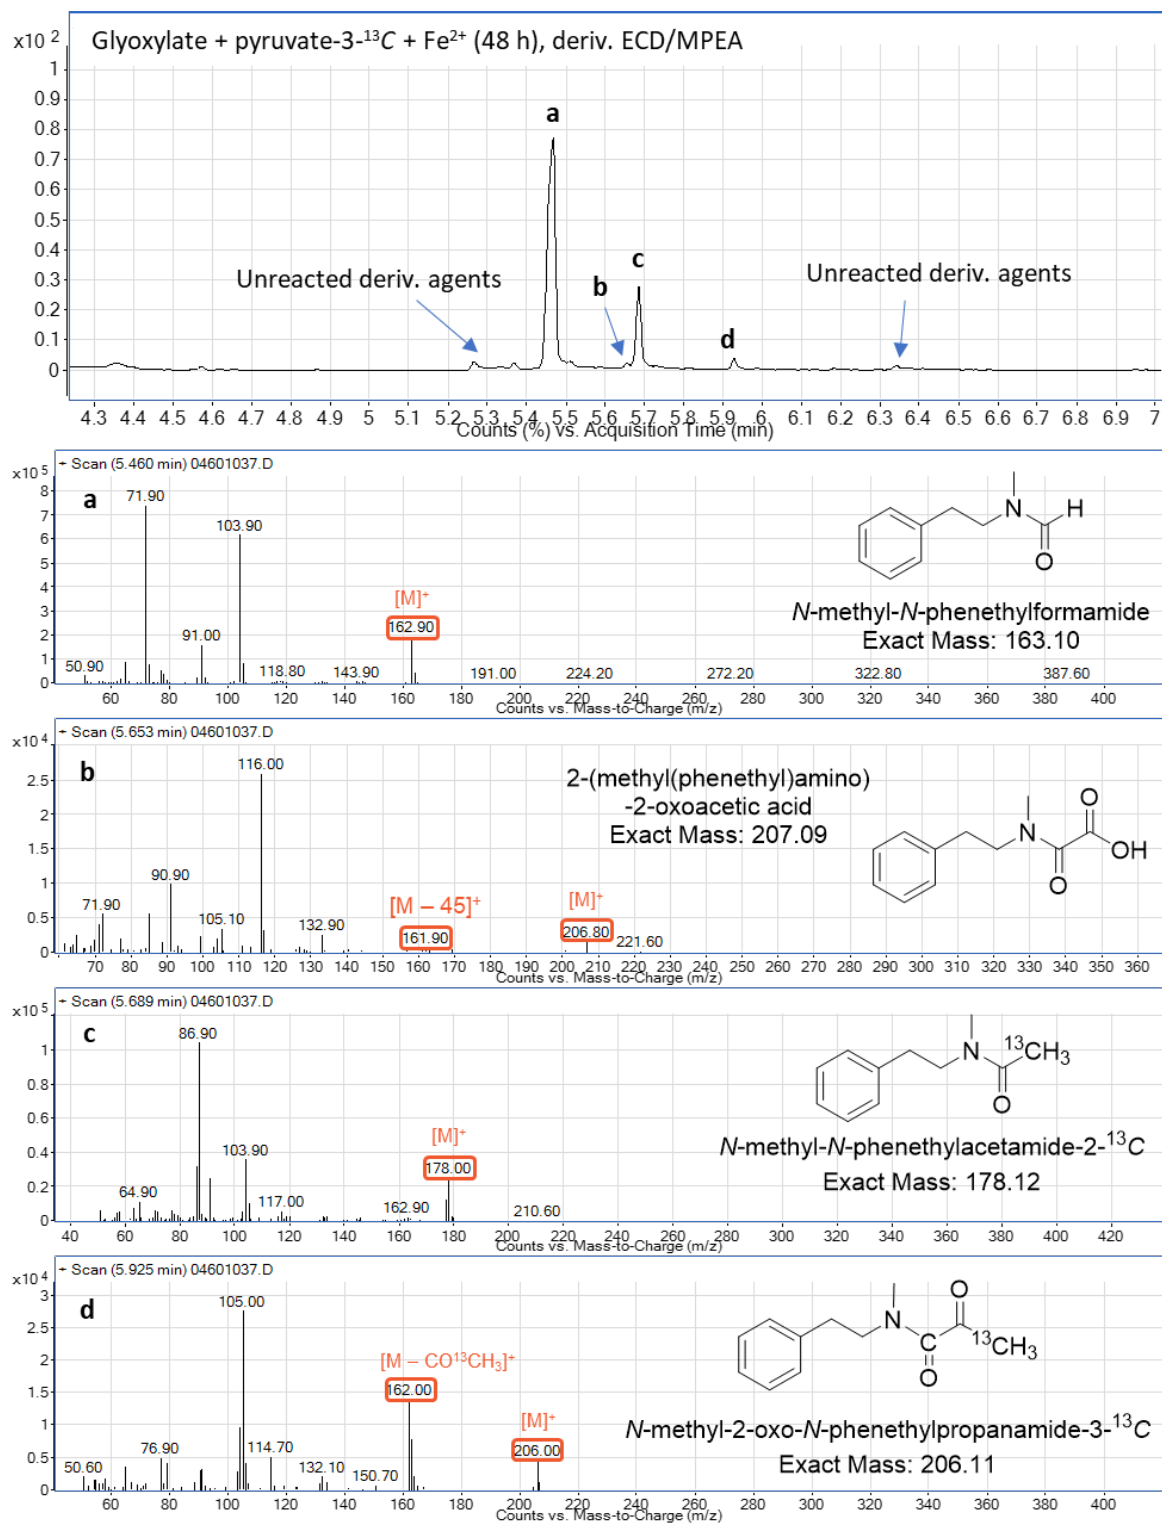

**Figure S27.**

GC chromatogram and mass spectra confirming the presence of formate, oxalate and acetate, detected as their *N*-methyl-*N*-phenethylamides, after derivatization of a typical reaction mixture (pyruvate-3-<sup>13</sup>C + glyoxylate) with ECD/MPEA after 48 h reaction time.

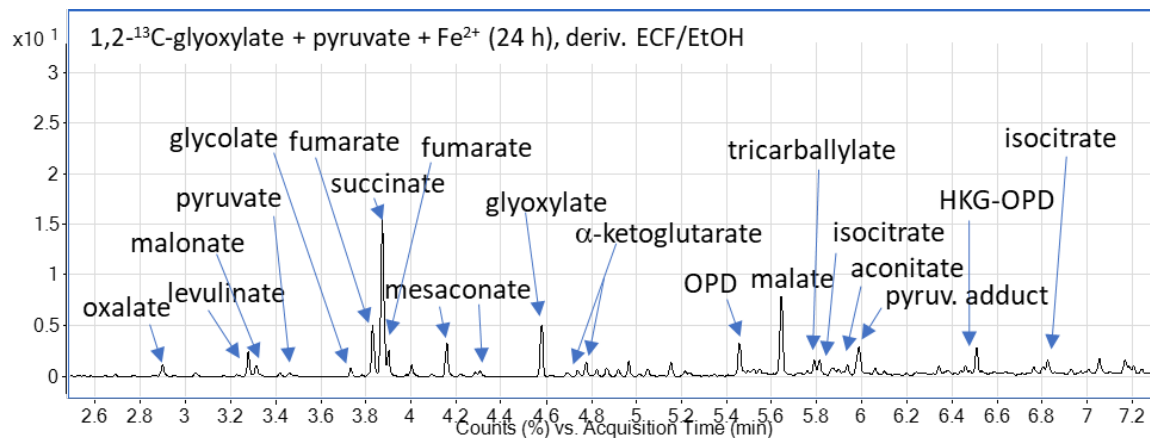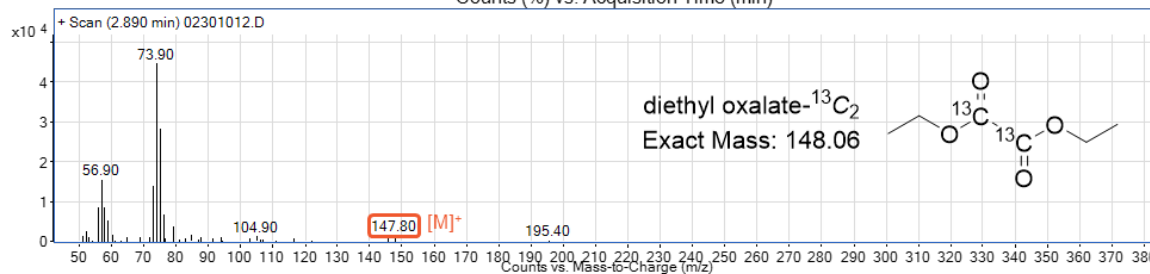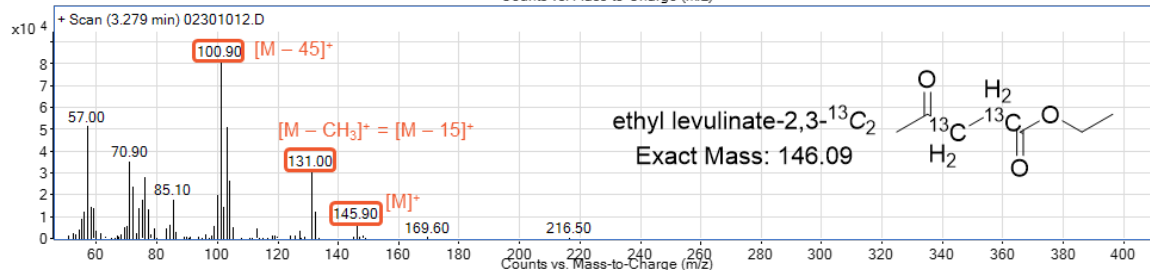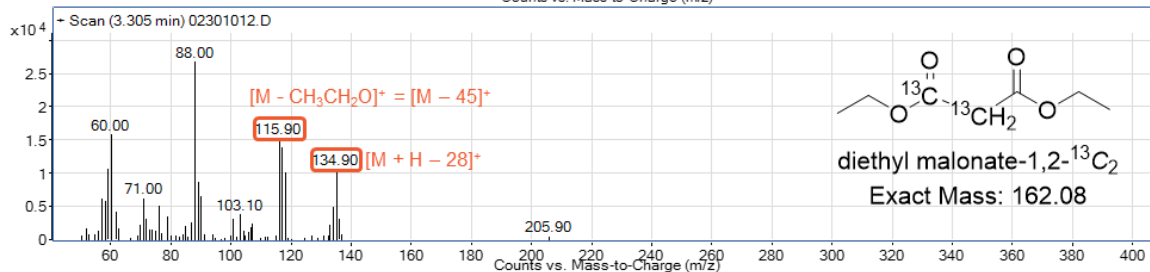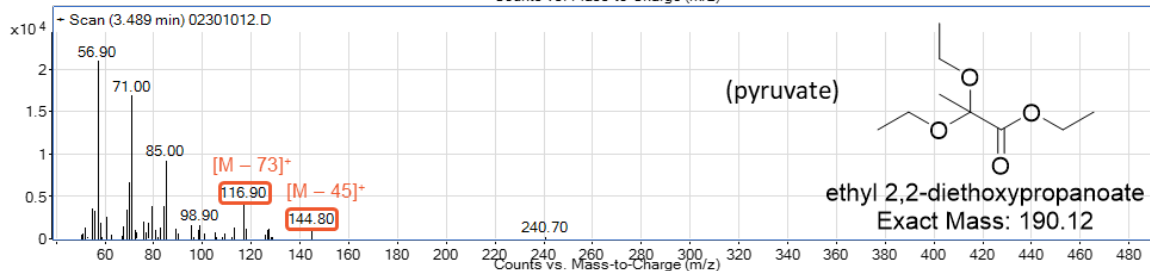

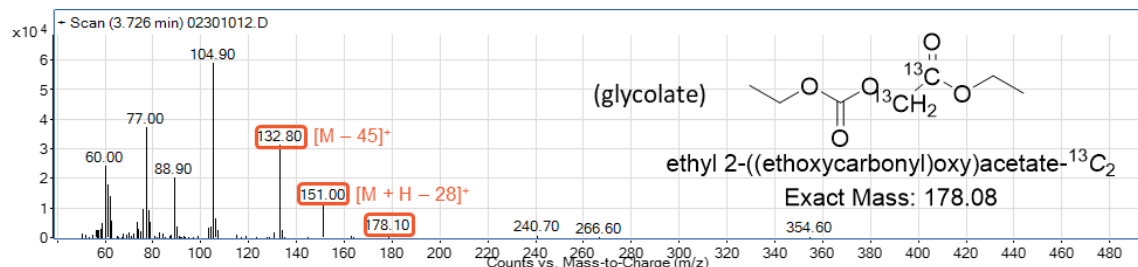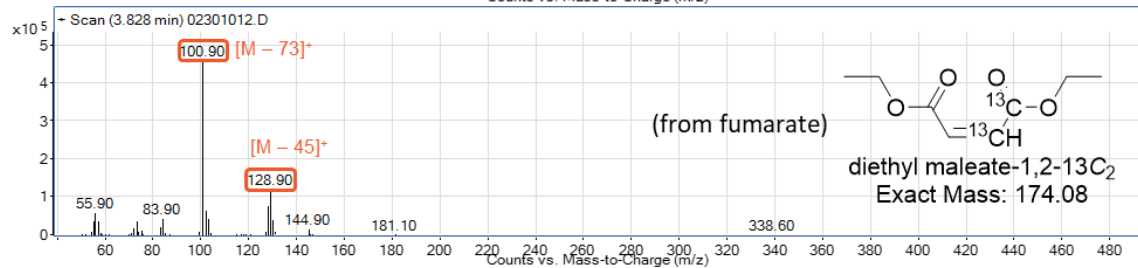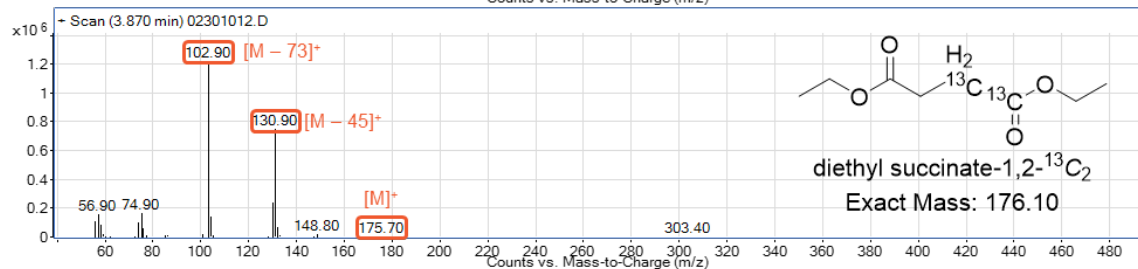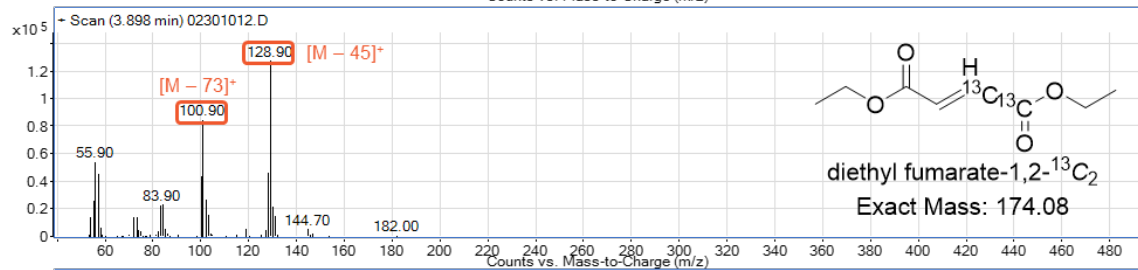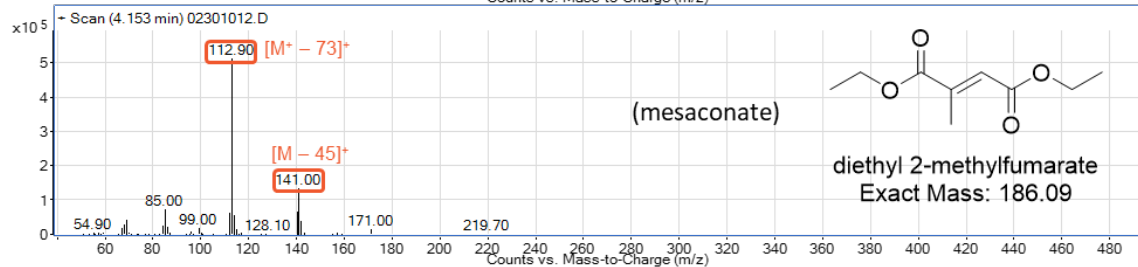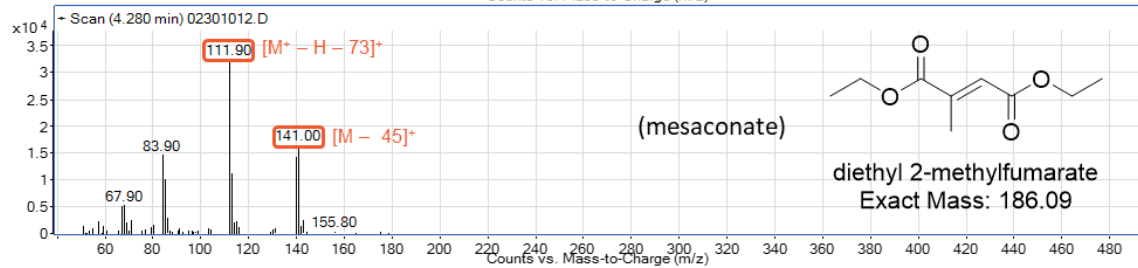

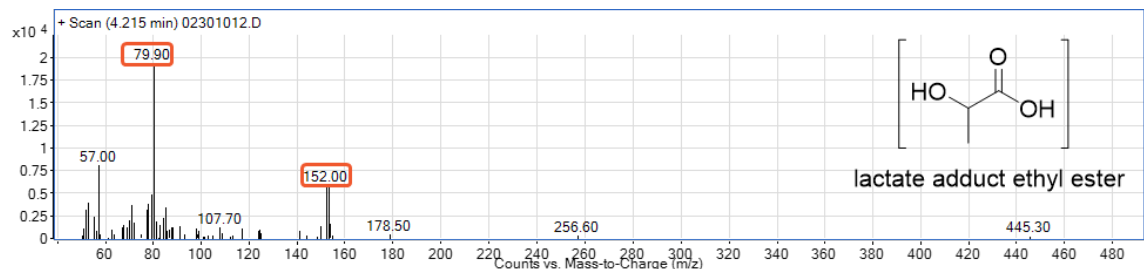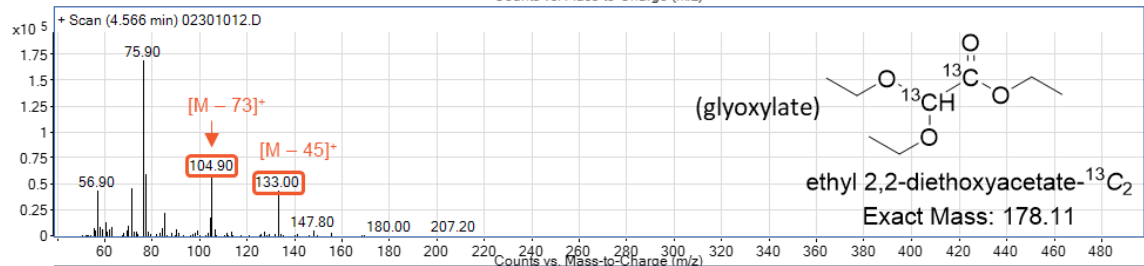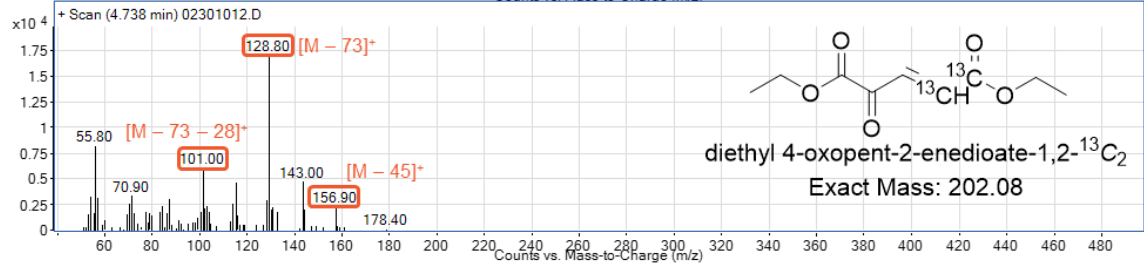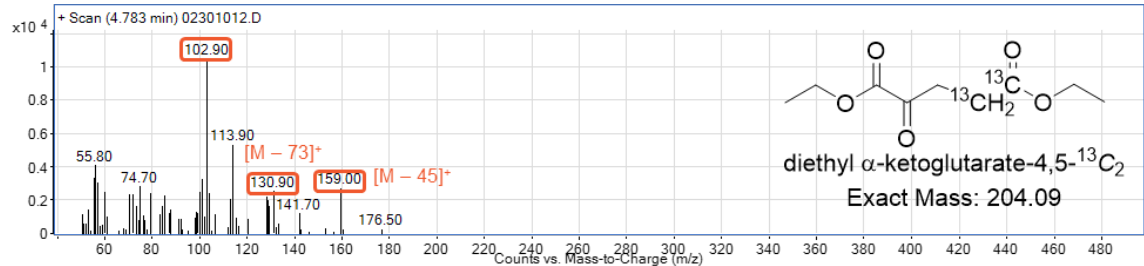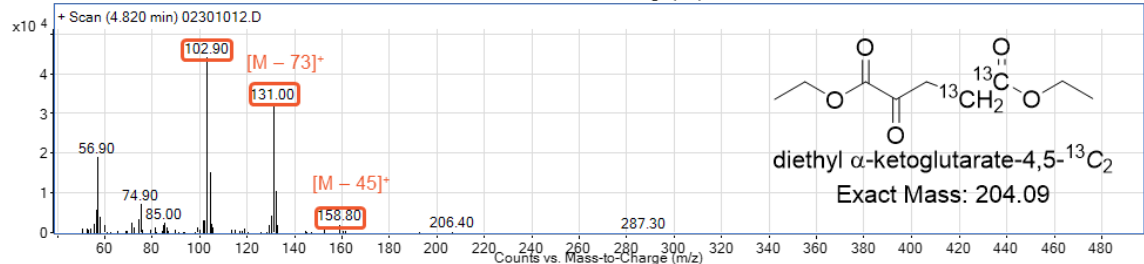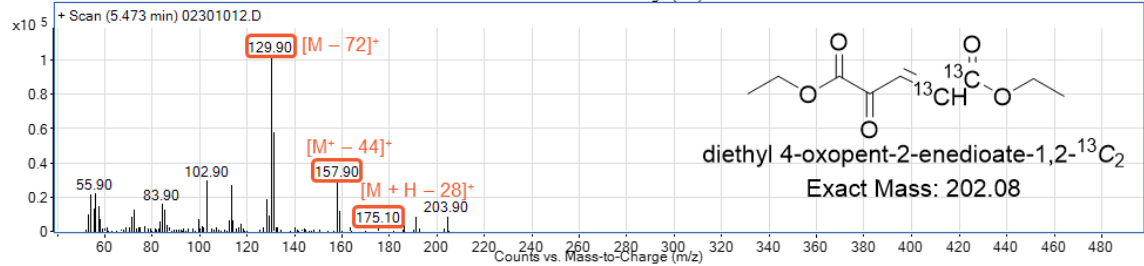

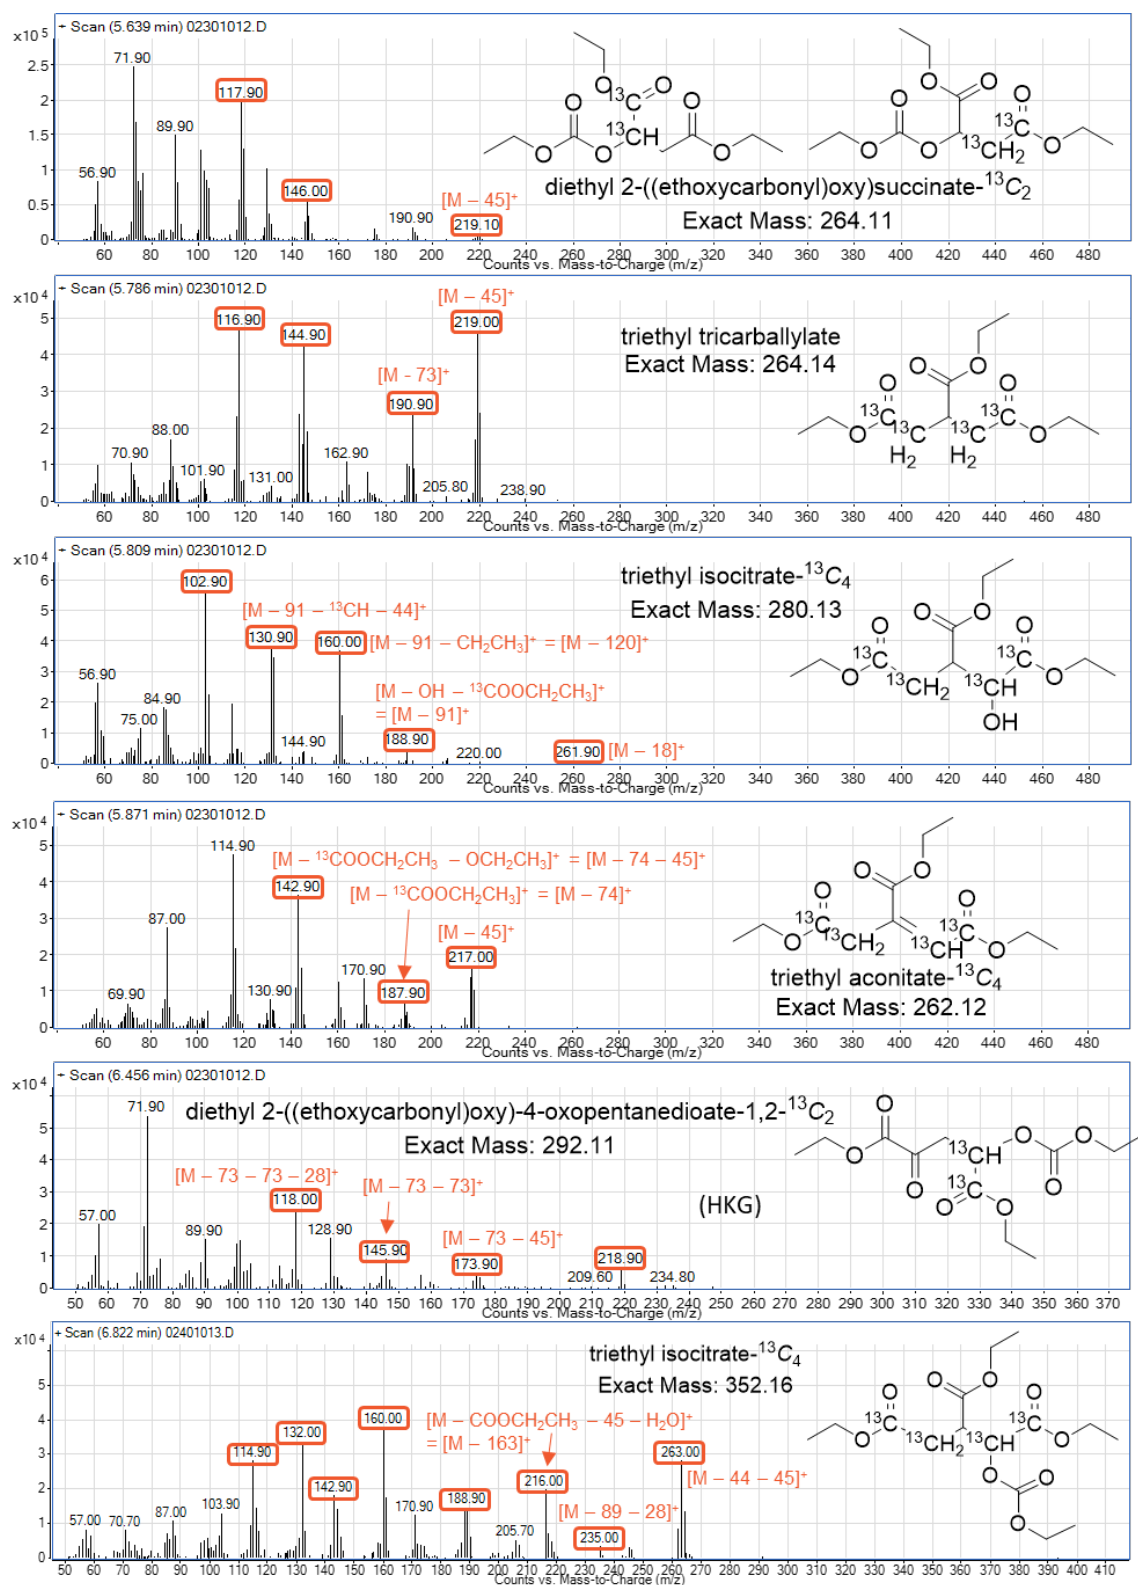

**Figure S28.**

GC chromatogram and mass spectra of ECF/EtOH-derivatized compounds detected at  $t = 24$  h in the reaction network arising from pyruvate and glyoxylate-1,2- $^{13}\text{C}_2$ , promoted by  $\text{Fe}^{2+}$  at  $70^\circ\text{C}$ . Characteristic (“fingerprint”) peaks are highlighted in red.

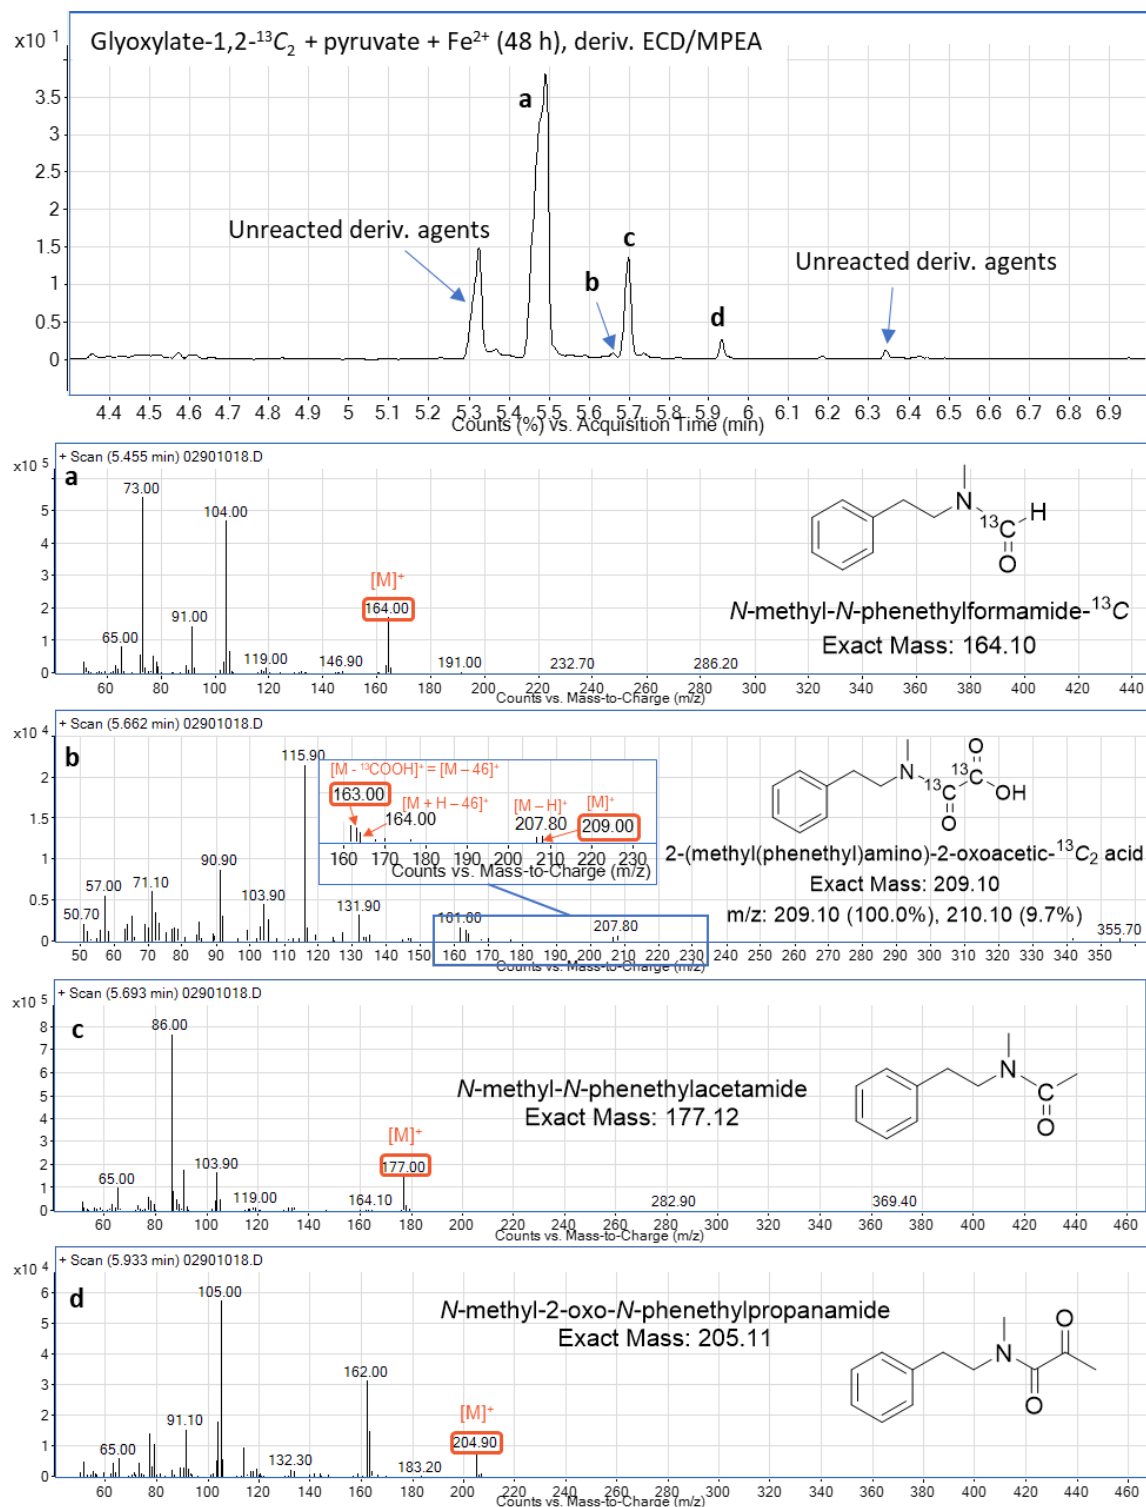

**Figure S29.**

GC chromatogram and mass spectra confirming the presence of formate, oxalate and acetate, detected as their *N*-methyl-*N*-phenethylamides, after derivatization of a typical reaction mixture (pyruvate + glyoxylate-1,2-<sup>13</sup>C<sub>2</sub>) with ECD/MPEA after 48 h reaction time.

**Table S1.**

Response factors corresponding to calibration lines ( $c = ax^2 + bx$ , where  $c$  = concentration in  $\text{mmol mL}^{-1}$ ,  $x$  = peak area, and  $a$ ,  $b$  = response factors) for all the compounds detected as their ethyl esters on the GC-MS in this study. Calibration lines were obtained in at least 3 replicas, with % error corresponding to the standard deviation of  $b$  (linear fit). \*For polynomial curves, see Figure S2 and Figure S10 for 95% confidence bounds (nonlinear fit, *OriginPro*).

| Intermediate                                  | Response factors |             | Error (on $b$ ), % |
|-----------------------------------------------|------------------|-------------|--------------------|
|                                               | $a$              | $b$         |                    |
| <i>Carboxylic acids detected on the GC-MS</i> |                  |             |                    |
| Oxalic                                        | 1871637755       | 105933343   | *                  |
| Malonic                                       | 7966254029       | 59730553    | *                  |
| Glycolic                                      | -                | 87414654    | 3                  |
| Levulinic                                     | 3551346017       | 114690195   | *                  |
| Glyoxylic                                     | -                | 1512276534  | 9                  |
| Pyruvic                                       | -                | 100121708   | 6                  |
| Lactic                                        | -                | 18684986864 | <i>single run</i>  |
| Malic                                         | -                | 7404200671  | 3                  |
| Fumaric                                       | -                | 5504902362  | 6                  |
| Succinic                                      | -                | 3013611468  | 8                  |
| $\alpha$ -Ketoglutaric                        | -                | 1230698200  | 4                  |
| $\alpha$ -Hydroxyglutaric                     | -                | 2397763078  | <i>single run</i>  |
| HKG/OPD                                       | 1871637755       | 105933343   | *                  |
| Isocitric                                     | -                | 1706650152  | 7                  |
| Aconitic                                      | -                | 2264986318  | 11                 |
| Mesaconic                                     | -                | 1790780000  | 4                  |
| Tricarballic                                  | -                | 3181106809  | 4                  |
| <i>Amino acids detected on the GC-MS</i>      |                  |             |                    |
| Glycine                                       | 8766531636       | 384533833.4 | *                  |
| Alanine                                       | -                | 3811220283  | 1                  |
| Aspartic acid                                 | 73528291403      | 556120932.3 |                    |
| Glutamic acid                                 | 7524177005       | 424126900.3 | *                  |
| <i>Carboxylic acids detected by NMR</i>       |                  |             |                    |
| Acetic acid (2.19 ppm)                        | -                | 40.97509    | 5                  |
| Formic acid (8.46 ppm)                        | -                | 18.26024    | 8                  |



**Table S2.**

Carbon balance of the glyoxylate-pyruvate reaction network calculated as mmol of carbon atoms retained in a typical reaction mixture (see: Synthetic procedures) at  $t = 0$  h to  $t = 48$  h time points. Reported values are an average obtained from two independent runs. Errors correspond to  $\pm$  standard deviation. “100%” corresponds to the material recovered from an aqueous solution of starting materials (SM) without  $\text{Fe}^{2+}$  added. *n. d.* = not determined.

| Intermediate     | #C | 0 h                                          | 5 min              | 1 h                | 3 h                | 7 h                | 10 h               | 24 h               | 48 h               |
|------------------|----|----------------------------------------------|--------------------|--------------------|--------------------|--------------------|--------------------|--------------------|--------------------|
|                  |    | C in reaction mixture, mmol mL <sup>-1</sup> |                    |                    |                    |                    |                    |                    |                    |
| SM: Glyoxylate   | 2  | 0.140 ± 0.016                                | 0.046 ± 0.013      | 0.002 ± 0.001      | 0.001 ± 0.000      | 0.001 ± 0.000      | 0.001 ± 0.000      | 0.001 ± 0.001      | 0.001 ± 0.000      |
| SM: Pyruvate     | 3  | 0.002 ± 0.000                                | 0.003 ± 0.000      | 0.002 ± 0.001      | 0.002 ± 0.001      | 0.006 ± 0.001      | 0.005 ± 0.000      | 0.003 ± 0.000      | 0.004 ± 0.001      |
| Lactate          | 3  | 0.000 ± 0.000                                | 0.000 ± 0.000      | 0.000 ± 0.000      | 0.000 ± 0.000      | 0.000 ± 0.000      | 0.000 ± 0.000      | 0.000 ± 0.000      | 0.000 ± 0.000      |
| Malate           | 4  | 0.000 ± 0.000                                | 0.000 ± 0.000      | 0.000 ± 0.000      | 0.000 ± 0.000      | 0.001 ± 0.000      | 0.001 ± 0.000      | 0.004 ± 0.000      | 0.004 ± 0.002      |
| Fumarate         | 4  | 0.000 ± 0.000                                | 0.000 ± 0.000      | 0.000 ± 0.000      | 0.000 ± 0.000      | 0.000 ± 0.000      | 0.000 ± 0.000      | 0.001 ± 0.000      | 0.001 ± 0.000      |
| Succinate        | 4  | 0.000 ± 0.000                                | 0.000 ± 0.000      | 0.000 ± 0.000      | 0.000 ± 0.000      | 0.000 ± 0.000      | 0.000 ± 0.000      | 0.001 ± 0.000      | 0.001 ± 0.000      |
| a-Keto-glutarate | 5  | 0.000 ± 0.000                                | 0.001 ± 0.000      | 0.009 ± 0.002      | 0.009 ± 0.005      | 0.007 ± 0.000      | 0.003 ± 0.000      | 0.002 ± 0.001      | 0.002 ± 0.000      |
| HKG/OPD          | 5  | 0.417 ± 0.026                                | 0.258 ± 0.018      | 0.183 ± 0.014      | 0.121 ± 0.001      | 0.096 ± 0.002      | 0.079 ± 0.009      | 0.042 ± 0.001      | 0.017 ± 0.001      |
| Isocitrate       | 6  | 0.000 ± 0.000                                | 0.000 ± 0.000      | 0.003 ± 0.000      | 0.007 ± 0.002      | 0.011 ± 0.000      | 0.010 ± 0.000      | 0.004 ± 0.001      | 0.005 ± 0.000      |
| Aconitate        | 6  | 0.000 ± 0.000                                | 0.000 ± 0.000      | 0.000 ± 0.000      | 0.000 ± 0.000      | 0.001 ± 0.000      | 0.001 ± 0.000      | 0.001 ± 0.000      | 0.002 ± 0.000      |
| Mesaconate       | 5  | 0.000 ± 0.000                                | 0.000 ± 0.000      | 0.000 ± 0.000      | 0.000 ± 0.000      | 0.000 ± 0.000      | 0.000 ± 0.000      | 0.000 ± 0.000      | 0.000 ± 0.000      |
| Tricarballylate  | 6  | 0.000 ± 0.000                                | 0.000 ± 0.000      | 0.000 ± 0.000      | 0.000 ± 0.000      | 0.000 ± 0.000      | 0.000 ± 0.000      | 0.002 ± 0.000      | 0.003 ± 0.000      |
| Oxalate          | 2  | 0.000 ± 0.000                                | 0.000 ± 0.000      | 0.000 ± 0.000      | 0.000 ± 0.000      | 0.001 ± 0.000      | 0.001 ± 0.000      | 0.001 ± 0.000      | 0.001 ± 0.000      |
| Malonate         | 3  | 0.000 ± 0.000                                | 0.000 ± 0.000      | 0.000 ± 0.000      | 0.003 ± 0.002      | 0.007 ± 0.000      | 0.006 ± 0.002      | 0.017 ± 0.007      | 0.006 ± 0.001      |
| Glycolate        | 2  | 0.000 ± 0.000                                | 0.000 ± 0.000      | 0.000 ± 0.000      | 0.000 ± 0.000      | 0.003 ± 0.001      | 0.002 ± 0.001      | 0.018 ± 0.004      | 0.030 ± 0.001      |
| Levulinate       | 5  | 0.003 ± 0.000                                | 0.013 ± 0.001      | 0.004 ± 0.001      | 0.004 ± 0.001      | 0.004 ± 0.001      | 0.004 ± 0.000      | 0.003 ± 0.000      | 0.004 ± 0.001      |
| <b>Sum, mmol</b> |    | <b>0.56 ± 0.01</b>                           | <b>0.32 ± 0.03</b> | <b>0.20 ± 0.02</b> | <b>0.15 ± 0.01</b> | <b>0.14 ± 0.00</b> | <b>0.12 ± 0.01</b> | <b>0.10 ± 0.00</b> | <b>0.09 ± 0.01</b> |
| <b>Sum, mol%</b> |    | <b>100% ± 2%</b>                             | <b>56% ± 6%</b>    | <b>36% ± 3%</b>    | <b>26% ± 2%</b>    | <b>24% ± 0%</b>    | <b>21% ± 2%</b>    | <b>18% ± 1%</b>    | <b>16% ± 1%</b>    |
| Acetate          | 2  | <i>n. d.</i>                                 |                    |                    |                    |                    |                    |                    | 0.009 ± 0.000      |
| Formate          | 1  | <i>n. d.</i>                                 |                    |                    |                    |                    |                    |                    | 0.012 ± 0.001      |

**Table S3.**

Products of the reaction of ketoacids with hydroxylamine hydrochloride (1 equiv) and  $\text{Fe}^0$  (10 equiv) at 100 °C over 16 h. Reported values are an average obtained from two independent runs. Errors correspond to  $\pm$ standard deviation.

| 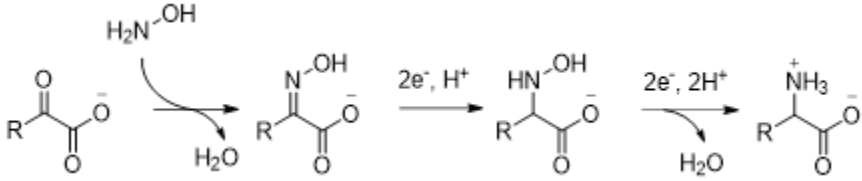 |                             |                                              |
|------------------------------------------------------------------------------------|-----------------------------|----------------------------------------------|
| Ketoacid                                                                           | Products (%)                |                                              |
|                                                                                    | Amination                   | Reduction                                    |
| Glyoxylic                                                                          | Glycine (63 $\pm$ 9%)       | Glycolic acid (26 $\pm$ 11%)                 |
| Pyruvic                                                                            | Alanine (2 $\pm$ 0%)        | Lactic acid (< 1 %)                          |
| Oxaloacetic                                                                        | Aspartic acid (17 $\pm$ 1%) | Malic acid (7 $\pm$ 1%)                      |
| $\alpha$ -Ketoglutaric                                                             | Glutamic acid (9 $\pm$ 2%)  | $\alpha$ -hydroxyglutaric acid (11 $\pm$ 0%) |

**Table S4.**

Carbon balance of the glyoxylate-pyruvate-2-<sup>13</sup>C reaction network calculated as mmol of carbon atoms retained in a typical reaction mixture (see: Synthetic procedures) at t = 0 h to t = 48 h time points. Reported values are an average obtained from two independent runs. Errors correspond to  $\pm$  standard deviation. “100%” corresponds to the material recovered from an aqueous solution of starting materials (SM) without Fe<sup>2+</sup> added. Grey shading denotes compounds with a detected <sup>13</sup>C label.

| Intermediate             | #C | 0 h                                          | 5 min                             | 1 h                               | 3 h                               | 7 h                               | 10 h                              | 24 h                              | 48 h                              |
|--------------------------|----|----------------------------------------------|-----------------------------------|-----------------------------------|-----------------------------------|-----------------------------------|-----------------------------------|-----------------------------------|-----------------------------------|
|                          |    | C in reaction mixture, mmol mL <sup>-1</sup> |                                   |                                   |                                   |                                   |                                   |                                   |                                   |
| SM: Glyoxylate           | 2  | 0.100 $\pm$ 0.001                            | 0.010 $\pm$ 0.000                 | 0.004 $\pm$ 0.000                 | 0.001 $\pm$ 0.001                 | 0.001 $\pm$ 0.000                 | 0.002 $\pm$ 0.000                 | 0.001 $\pm$ 0.000                 | 0.001 $\pm$ 0.000                 |
| SM: Pyruvate             | 3  | 0.000 $\pm$ 0.000                            | 0.007 $\pm$ 0.002                 | 0.003 $\pm$ 0.000                 | 0.001 $\pm$ 0.000                 | 0.004 $\pm$ 0.001                 | 0.003 $\pm$ 0.000                 | 0.003 $\pm$ 0.000                 | 0.003 $\pm$ 0.000                 |
| Lactate                  | 3  | 0.000 $\pm$ 0.000                            | 0.000 $\pm$ 0.000                 | 0.000 $\pm$ 0.000                 | 0.000 $\pm$ 0.000                 | 0.000 $\pm$ 0.000                 | 0.000 $\pm$ 0.000                 | 0.000 $\pm$ 0.000                 | 0.000 $\pm$ 0.000                 |
| Malate                   | 4  | 0.000 $\pm$ 0.000                            | 0.000 $\pm$ 0.000                 | 0.000 $\pm$ 0.000                 | 0.000 $\pm$ 0.000                 | 0.001 $\pm$ 0.000                 | 0.001 $\pm$ 0.001                 | 0.004 $\pm$ 0.001                 | 0.004 $\pm$ 0.001                 |
| Fumarate                 | 4  | 0.000 $\pm$ 0.000                            | 0.000 $\pm$ 0.000                 | 0.000 $\pm$ 0.000                 | 0.000 $\pm$ 0.000                 | 0.000 $\pm$ 0.000                 | 0.001 $\pm$ 0.000                 | 0.001 $\pm$ 0.000                 | 0.001 $\pm$ 0.000                 |
| Succinate                | 4  | 0.000 $\pm$ 0.000                            | 0.000 $\pm$ 0.000                 | 0.000 $\pm$ 0.000                 | 0.000 $\pm$ 0.000                 | 0.000 $\pm$ 0.000                 | 0.001 $\pm$ 0.000                 | 0.001 $\pm$ 0.000                 | 0.001 $\pm$ 0.000                 |
| $\alpha$ -Keto-glutarate | 5  | 0.000 $\pm$ 0.000                            | 0.000 $\pm$ 0.000                 | 0.011 $\pm$ 0.001                 | 0.006 $\pm$ 0.001                 | 0.004 $\pm$ 0.000                 | 0.005 $\pm$ 0.000                 | 0.002 $\pm$ 0.000                 | 0.002 $\pm$ 0.000                 |
| HKG/OPD                  | 5  | 0.361 $\pm$ 0.008                            | 0.224 $\pm$ 0.037                 | 0.164 $\pm$ 0.016                 | 0.111 $\pm$ 0.024                 | 0.094 $\pm$ 0.003                 | 0.061 $\pm$ 0.007                 | 0.034 $\pm$ 0.007                 | 0.010 $\pm$ 0.001                 |
| Isocitrate               | 6  | 0.000 $\pm$ 0.000                            | 0.000 $\pm$ 0.000                 | 0.001 $\pm$ 0.000                 | 0.002 $\pm$ 0.001                 | 0.003 $\pm$ 0.000                 | 0.006 $\pm$ 0.000                 | 0.003 $\pm$ 0.000                 | 0.002 $\pm$ 0.000                 |
| Aconitate                | 6  | 0.000 $\pm$ 0.000                            | 0.000 $\pm$ 0.000                 | 0.000 $\pm$ 0.000                 | 0.000 $\pm$ 0.000                 | 0.000 $\pm$ 0.000                 | 0.001 $\pm$ 0.000                 | 0.001 $\pm$ 0.000                 | 0.001 $\pm$ 0.000                 |
| Mesaconate               | 5  | 0.000 $\pm$ 0.000                            | 0.000 $\pm$ 0.000                 | 0.000 $\pm$ 0.000                 | 0.000 $\pm$ 0.000                 | 0.000 $\pm$ 0.000                 | 0.000 $\pm$ 0.000                 | 0.000 $\pm$ 0.000                 | 0.000 $\pm$ 0.000                 |
| Tricarballylate          | 6  | 0.000 $\pm$ 0.000                            | 0.000 $\pm$ 0.000                 | 0.000 $\pm$ 0.000                 | 0.000 $\pm$ 0.000                 | 0.000 $\pm$ 0.000                 | 0.000 $\pm$ 0.000                 | 0.001 $\pm$ 0.000                 | 0.002 $\pm$ 0.000                 |
| Oxalate                  | 2  | 0.000 $\pm$ 0.000                            | 0.000 $\pm$ 0.000                 | 0.000 $\pm$ 0.000                 | 0.000 $\pm$ 0.000                 | 0.000 $\pm$ 0.000                 | 0.001 $\pm$ 0.000                 | 0.000 $\pm$ 0.000                 | 0.001 $\pm$ 0.001                 |
| Malonate                 | 3  | 0.000 $\pm$ 0.000                            | 0.000 $\pm$ 0.000                 | 0.001 $\pm$ 0.000                 | 0.002 $\pm$ 0.000                 | 0.002 $\pm$ 0.001                 | 0.010 $\pm$ 0.003                 | 0.012 $\pm$ 0.005                 | 0.004 $\pm$ 0.000                 |
| Glycolate                | 2  | 0.000 $\pm$ 0.000                            | 0.000 $\pm$ 0.000                 | 0.000 $\pm$ 0.000                 | 0.000 $\pm$ 0.000                 | 0.005 $\pm$ 0.001                 | 0.006 $\pm$ 0.000                 | 0.026 $\pm$ 0.004                 | 0.041 $\pm$ 0.006                 |
| Levulinate               | 5  | 0.000 $\pm$ 0.000                            | 0.038 $\pm$ 0.011                 | 0.006 $\pm$ 0.001                 | 0.004 $\pm$ 0.002                 | 0.003 $\pm$ 0.000                 | 0.005 $\pm$ 0.001                 | 0.003 $\pm$ 0.000                 | 0.003 $\pm$ 0.000                 |
| <b>Sum, mmol</b>         |    | <b>0.46 <math>\pm</math> 0.01</b>            | <b>0.28 <math>\pm</math> 0.05</b> | <b>0.19 <math>\pm</math> 0.02</b> | <b>0.13 <math>\pm</math> 0.03</b> | <b>0.12 <math>\pm</math> 0.00</b> | <b>0.10 <math>\pm</math> 0.00</b> | <b>0.10 <math>\pm</math> 0.01</b> | <b>0.08 <math>\pm</math> 0.01</b> |
| <b>Sum, mol%</b>         |    | <b>100% <math>\pm</math> 2%</b>              | <b>49% <math>\pm</math> 9%</b>    | <b>33% <math>\pm</math> 3%</b>    | <b>22% <math>\pm</math> 5%</b>    | <b>21% <math>\pm</math> 0%</b>    | <b>18% <math>\pm</math> 0%</b>    | <b>17% <math>\pm</math> 1%</b>    | <b>15% <math>\pm</math> 1%</b>    |
